# Supplementary material for: Bioassay-guided purification of sesquiterpenoids from the fruiting bodies of Fomitopsis pinicola and their anti-inflammatory activity
Source: PubMed Central journal article supplement — RSC Adv. 2019 Oct 23;9(59):34184–95. doi: 10.1039/c9ra05899k (PMC9073629; doi:10.1039/c9ra05899k), 2019-10-23
Supplement: RA-009-C9RA05899K-s001.pdf [file RA-009-C9RA05899K-s001.pdf]

## **Bioassay-guided Purification of Sesquiterpsnoids from the Fruiting Bodies of *Fomitopsis pinicola* and Their Bioactivity**

Shih-Huang Tai,<sup>a, Δ</sup> Ping-Chung Kuo,<sup>b, Δ</sup> Ching-Che Hung,<sup>c</sup> Ying-Hsuan Lin,<sup>d</sup> Tsong-Long Hwang,<sup>e</sup> Sio Hong Lam,<sup>b</sup> Daih-Huang Kuo,<sup>f</sup> Jin-Bin Wu,<sup>g</sup> Hsin-Yi Hung,<sup>b,\*</sup> Tian-Shung Wu<sup>b,f,\*</sup>

<sup>a</sup> Departments of Surgery and Anesthesiology, and Institute of Biomedical Engineering, National Cheng Kung University, Medical Center and Medical School, Tainan 701, Taiwan

<sup>b</sup> School of Pharmacy, College of Medicine, National Cheng Kung University, Tainan 70101, Taiwan

<sup>c</sup> Department of Chemistry, National Cheng Kung University, Tainan 70101, Taiwan

<sup>d</sup> Department of Environmental Sciences, University of California, Riverside, California 92521, United States

<sup>e</sup> Graduate Institute of Natural Products, College of Medicine, Chang Gung University; Research Center for Industry of Human Ecology, Research Center for Chinese Herbal Medicine, and Graduate Institute of Health Industry Technology, College of Human Ecology, Chang Gung University of Science and Technology; and Department of Anesthesiology, Chang Gung Memorial Hospital, Taoyuan 333, Taiwan

<sup>f</sup> Department of Pharmacy, College of Pharmacy and Health Care, Tajen University, Pingtung 907, Taiwan

<sup>g</sup> Jen-Li Biotechnology Company, Taichung, Taiwan

<sup>Δ</sup> The authors contribute equally to this work.

## Table of Content

|                                                                                                |    |
|------------------------------------------------------------------------------------------------|----|
| S 1 <sup>1</sup> H NMR (400 MHz, CDCl <sub>3</sub> ) spectrum of fomitopin-A (1).....          | 7  |
| S 2 <sup>13</sup> C NMR (100 MHz, CDCl <sub>3</sub> ) spectrum of fomitopin-A (1).....         | 8  |
| S 3 COSY spectrum of fomitopin-A (1).....                                                      | 9  |
| S 4 HSQC spectrum and key of HSQC spectrum of fomitopin-A (1).....                             | 10 |
| S 5 HMBC spectrum of fomitopin-A (1). ....                                                     | 11 |
| S 6 ECD spectrum of fomitopin-A (1). ....                                                      | 12 |
| S 7 ORTEP drawing of fomitopin-A (1). ....                                                     | 13 |
| S 8 <sup>1</sup> H NMR (400 MHz, CDCl <sub>3</sub> ) spectrum of fomitopin-B (2).....          | 14 |
| S 9 <sup>13</sup> C NMR (100 MHz, CDCl <sub>3</sub> ) spectrum of fomitopin-B (2).....         | 15 |
| S 10 COSY spectrum of fomitopin-B (2).....                                                     | 16 |
| S 11 HSQC spectrum and key of HSQC spectrum of fomitopin-B (2).....                            | 17 |
| S 12 HMBC spectrum of fomitopin-B (2).....                                                     | 18 |
| S 13 ECD spectrum of fomitopin-B (2). ....                                                     | 19 |
| S 14 <sup>1</sup> H NMR (400 MHz, Acetone-d <sub>6</sub> ) spectrum of fomitopin-C (3).....    | 20 |
| S 15 <sup>13</sup> C NMR (100 MHz, Acetone-d <sub>6</sub> ) spectrum of fomitopin- C (3). .... | 21 |
| S 16 COSY spectrum of fomitopin-C (3).....                                                     | 22 |
| S 17 NOESY spectrum of fomitopin-C (3). ....                                                   | 23 |
| S 18 HSQC spectrum and key of HSQC spectrum of fomitopin-C (3).....                            | 24 |
| S 19 HMBC spectrum of fomitopin-C (3).....                                                     | 25 |
| S 20 ECD spectrum of fomitopin-C (3). ....                                                     | 26 |
| S 21 <sup>1</sup> H NMR (400 MHz, CDCl <sub>3</sub> ) spectrum of fomitopin-D (4).....         | 27 |
| S 22 <sup>13</sup> C NMR (100 MHz, CDCl <sub>3</sub> ) spectrum of fomitopin-D (4).....        | 28 |
| S 23 COSY spectrum of fomitopin-D (4).....                                                     | 29 |

|                                                                                           |    |
|-------------------------------------------------------------------------------------------|----|
| S 24 NOESY spectrum and key of NOESY spectrum of fomitopin-D (4). .....                   | 30 |
| S 25 HSQC spectrum and key of HSQC spectrum of fomitopin-D (4).....                       | 31 |
| S 26 HMBC spectrum of fomitopin-D (4). .....                                              | 32 |
| S 27 ECD spectrum of fomitopin-D (4). .....                                               | 33 |
| S 28 <sup>1</sup> H NMR (400 MHz, CDCl <sub>3</sub> ) spectrum of fomitopin-E (5). .....  | 34 |
| S 29 <sup>13</sup> C NMR (100 MHz, CDCl <sub>3</sub> ) spectrum of fomitopin-E (5). ..... | 35 |
| S 30 COSY spectrum of fomitopin-E (5). .....                                              | 36 |
| S 31 NOESY spectrum and key of NOESY spectrum of fomitopin-E (5).....                     | 37 |
| S 32 HSQC spectrum and key of HSQC spectrum of fomitopin-E (5). .....                     | 38 |
| S 33 HMBC spectrum of fomitopin-E (5). .....                                              | 39 |
| S 34 ECD spectrum of fomitopin-E (5).....                                                 | 40 |
| S 35 <sup>1</sup> H NMR (400 MHz, CDCl <sub>3</sub> ) spectrum of fomitopin-F (6). .....  | 41 |
| S 36 <sup>13</sup> C NMR (100 MHz, CDCl <sub>3</sub> ) spectrum of fomitopin-F (6). ..... | 42 |
| S 37 COSY spectrum of fomitopin-F (6). .....                                              | 43 |
| S 38 NOESY spectrum of fomitopin-F (6).....                                               | 44 |
| S 39 HSQC spectrum and key of HSQC spectrum of fomitopin-F (6). .....                     | 45 |
| S 40 HMBC spectrum of fomitopin-F (6). .....                                              | 46 |
| S 41 ECD spectrum of fomitopin-F (6).....                                                 | 47 |
| S 42 <sup>1</sup> H NMR (400 MHz, CDCl <sub>3</sub> ) spectrum of fomitopin-G (7).....    | 48 |
| S 43 <sup>13</sup> C NMR (100 MHz, CDCl <sub>3</sub> ) spectrum of fomitopin-G (7).....   | 49 |
| S 44 COSY spectrum of fomitopin-G (7).....                                                | 50 |
| S 45 HSQC spectrum and key of HSQC spectrum of fomitopin-G (7).....                       | 51 |
| S 46 HMBC spectrum of fomitopin-G (7). .....                                              | 52 |
| S 47 ECD spectrum of fomitopin-G (7). .....                                               | 53 |

|                                                                                                 |    |
|-------------------------------------------------------------------------------------------------|----|
| S 48 <sup>1</sup> H NMR (400 MHz, CDCl <sub>3</sub> ) spectrum of fomitopin-H (8).....          | 54 |
| S 49 <sup>13</sup> C NMR (100 MHz, CDCl <sub>3</sub> ) spectrum of fomitopin-H (8).....         | 55 |
| S 50 COSY spectrum of fomitopin-H (8).....                                                      | 56 |
| S 51 HSQC spectrum and key of HSQC spectrum of fomitopin-H (8).....                             | 57 |
| S 52 HMBC spectrum of fomitopin-H (8). .....                                                    | 58 |
| S 53 ECD spectrum of fomitopin-H (8). .....                                                     | 59 |
| S 54 <sup>1</sup> H NMR (400 MHz, CDCl <sub>3</sub> ) spectrum of fomitopin-I (9). .....        | 60 |
| S 55 <sup>13</sup> C NMR (100 MHz, CDCl <sub>3</sub> ) spectrum of fomitopin-I (9). .....       | 61 |
| S 56 COSY spectrum of fomitopin-I (9). .....                                                    | 62 |
| S 57 HSQC spectrum and key of HSQC spectrum of fomitopin-I (9). .....                           | 63 |
| S 58 HMBC spectrum of fomitopin-I (9). .....                                                    | 64 |
| S 59 ECD spectrum of fomitopin-I (9).....                                                       | 65 |
| S 60 <sup>1</sup> H NMR (400 MHz, CDCl <sub>3</sub> ) spectrum of fomitopin-J (10).....         | 66 |
| S 61 <sup>13</sup> C NMR (100 MHz, CDCl <sub>3</sub> ) spectrum of fomitopin-J (10).....        | 67 |
| S 62 COSY spectrum of fomitopin-J (10).....                                                     | 68 |
| S 63 NOESY spectrum and key of NOESY spectrum of fomitopin-J (10).....                          | 69 |
| S 64 HSQC spectrum and key of HSQC spectrum of fomitopin-J (10).....                            | 70 |
| S 65 HMBC spectrum of fomitopin-J (10).....                                                     | 71 |
| S 66 ECD spectrum of fomitopin-J (10).....                                                      | 72 |
| S 67 <sup>1</sup> H NMR (400 MHz, Acetone-d <sub>6</sub> ) spectrum of fomitopin-K (11). .....  | 73 |
| S 68 <sup>13</sup> C NMR (100 MHz, Acetone-d <sub>6</sub> ) spectrum of fomitopin-K (11). ..... | 74 |
| S 69 COSY spectrum of fomitopin-K (11).....                                                     | 75 |
| S 70 HSQC spectrum and key of HSQC spectrum of fomitopin-K (11).....                            | 76 |
| S 71 HMBC spectrum of fomitopin-K (11). .....                                                   | 77 |

|                                                                                            |    |
|--------------------------------------------------------------------------------------------|----|
| S 72 ECD spectrum of fomitopin-K (11). .....                                               | 78 |
| S 69 <sup>1</sup> H NMR (400 MHz, CDCl <sub>3</sub> ) spectrum of fomitopin-L (12). .....  | 79 |
| S 70 <sup>13</sup> C NMR (100 MHz, CDCl <sub>3</sub> ) spectrum of fomitopin-L (12). ..... | 80 |
| S 71 COSY spectrum of fomitopin-L (12). .....                                              | 81 |
| S 72 HSQC spectrum and key of HSQC spectrum of fomitopin-L (12). .....                     | 82 |
| S 73 HMBC spectrum of fomitopin-L (12). .....                                              | 83 |
| S 74 ECD spectrum of fomitopin-L (12). .....                                               | 84 |
| S 75 Anti-inflammatory activity of <i>Fomitopsis pinicola</i> fractions. ....              | 85 |
| Table 1. Crystal data and structure refinement for Fomitopin A. ....                       | 86 |

**S 1 <sup>1</sup>H NMR (400 MHz, CDCl<sub>3</sub>) spectrum of fomitopin-A (1).**

FP-5-v9 CDCl<sub>3</sub> 102/09/13 AVVIII400 (H1)

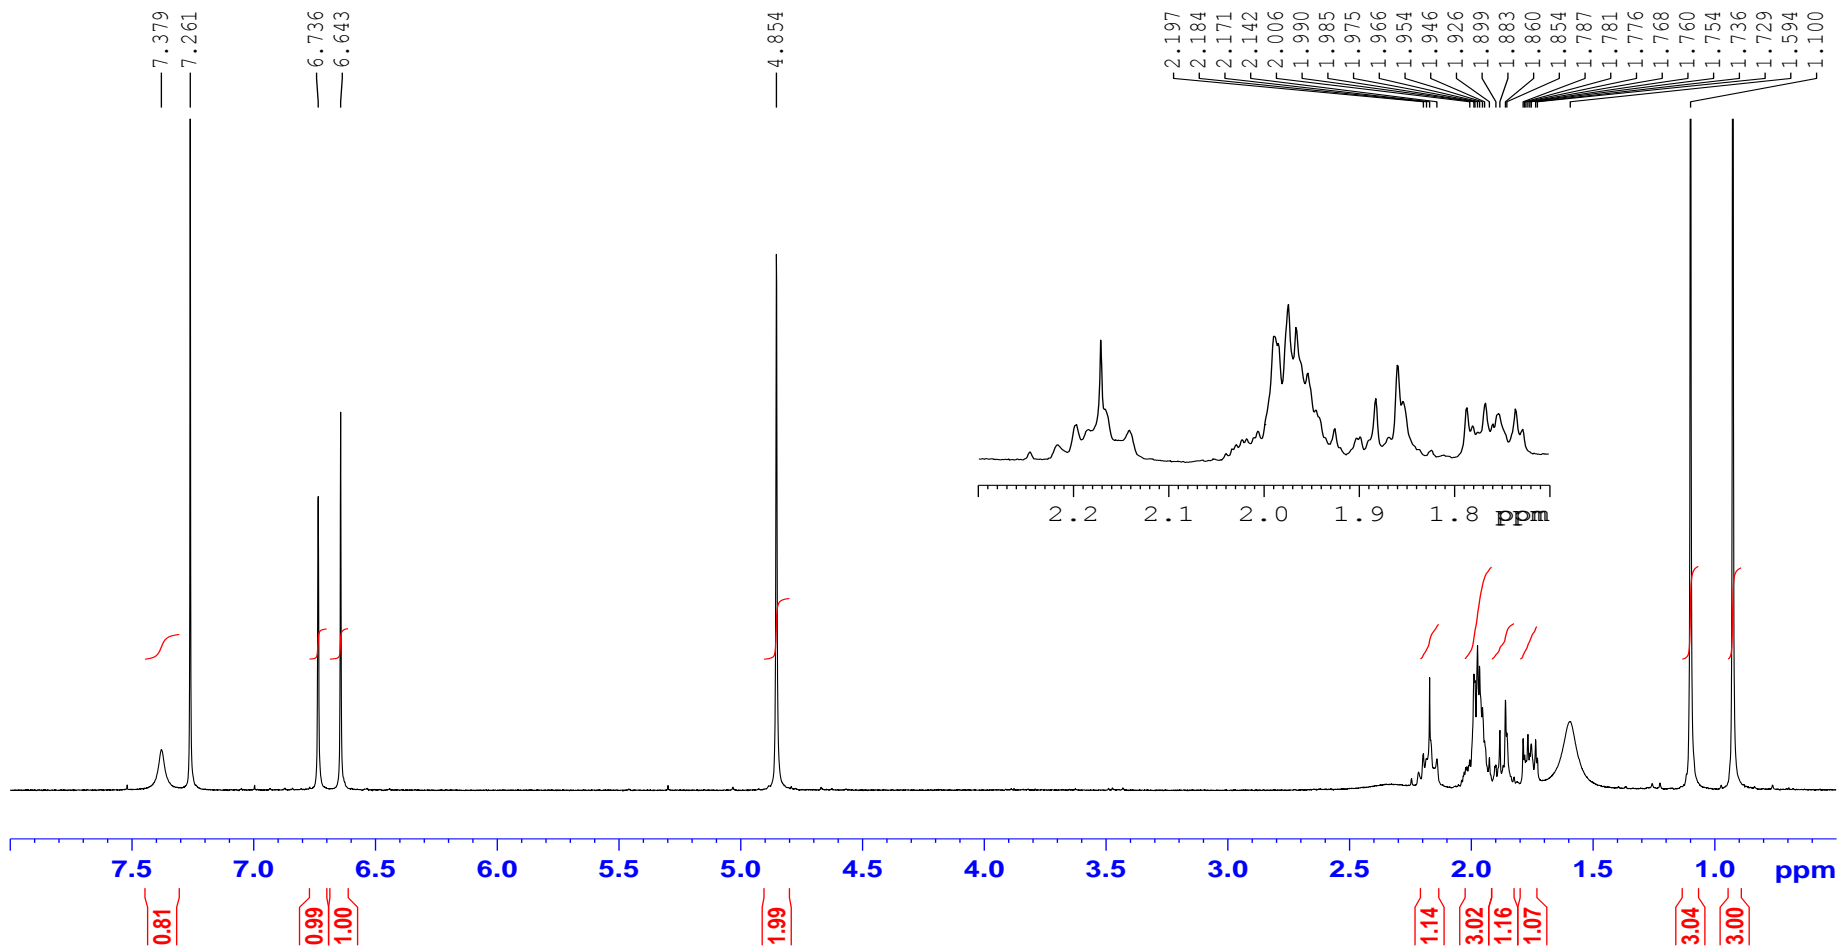

**S 2 <sup>13</sup>C NMR (100 MHz, CDCl<sub>3</sub>) spectrum of fomitopin-A (1).**

FP-5-v9 CDCl<sub>3</sub> 102/09/14 AVIII400

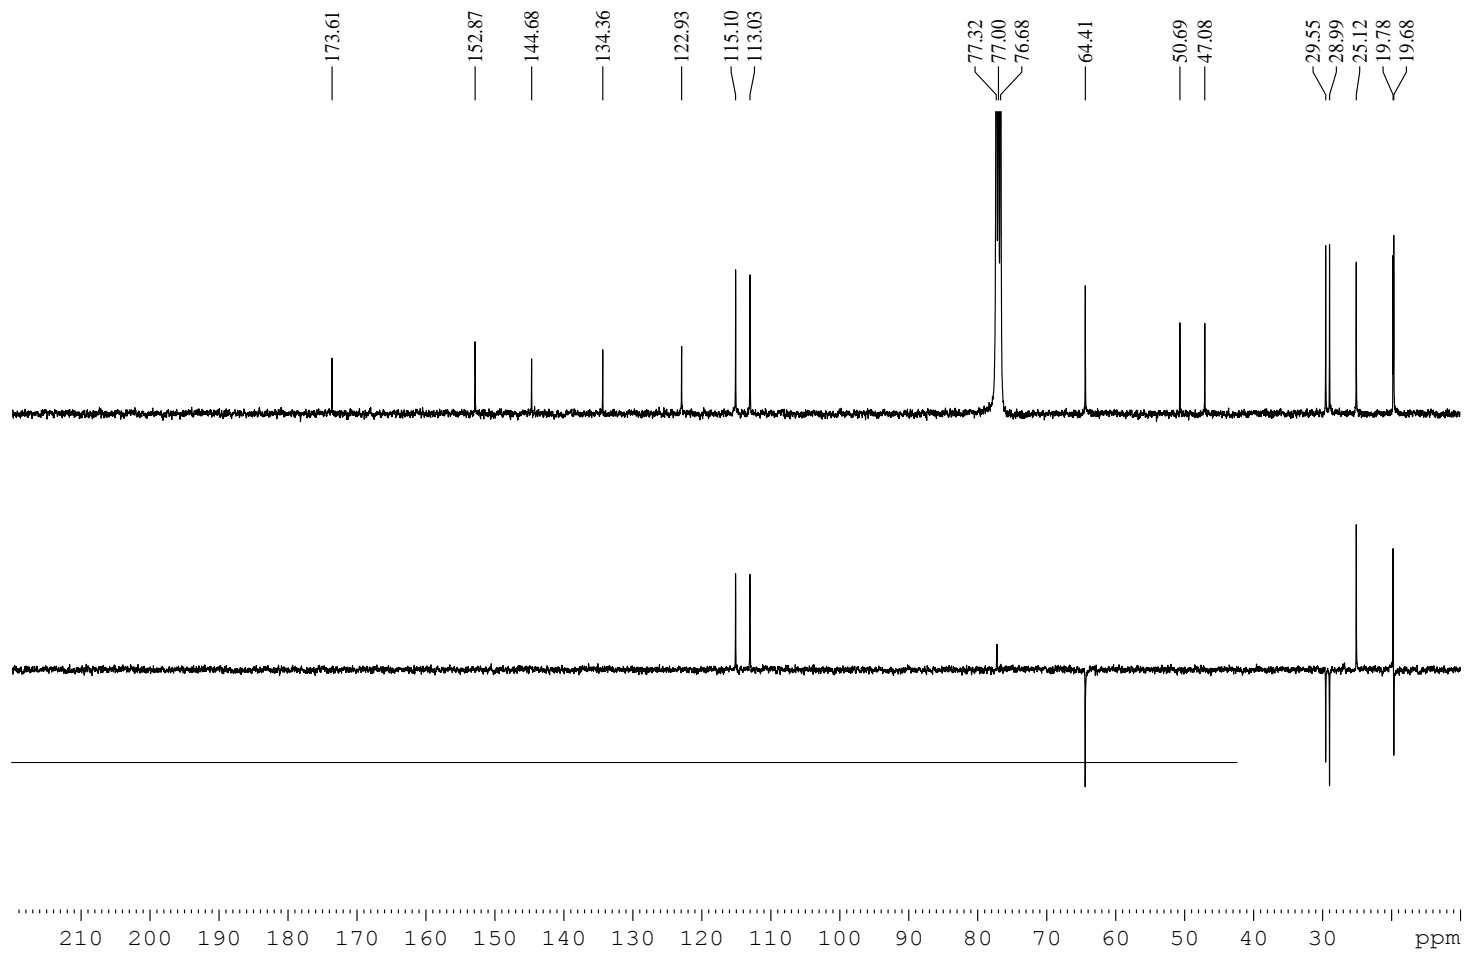



### S 3 COSY spectrum of fomitopin-A (1).

FP-5-v9 CDC13 102/09/14 AVIII400 COSY

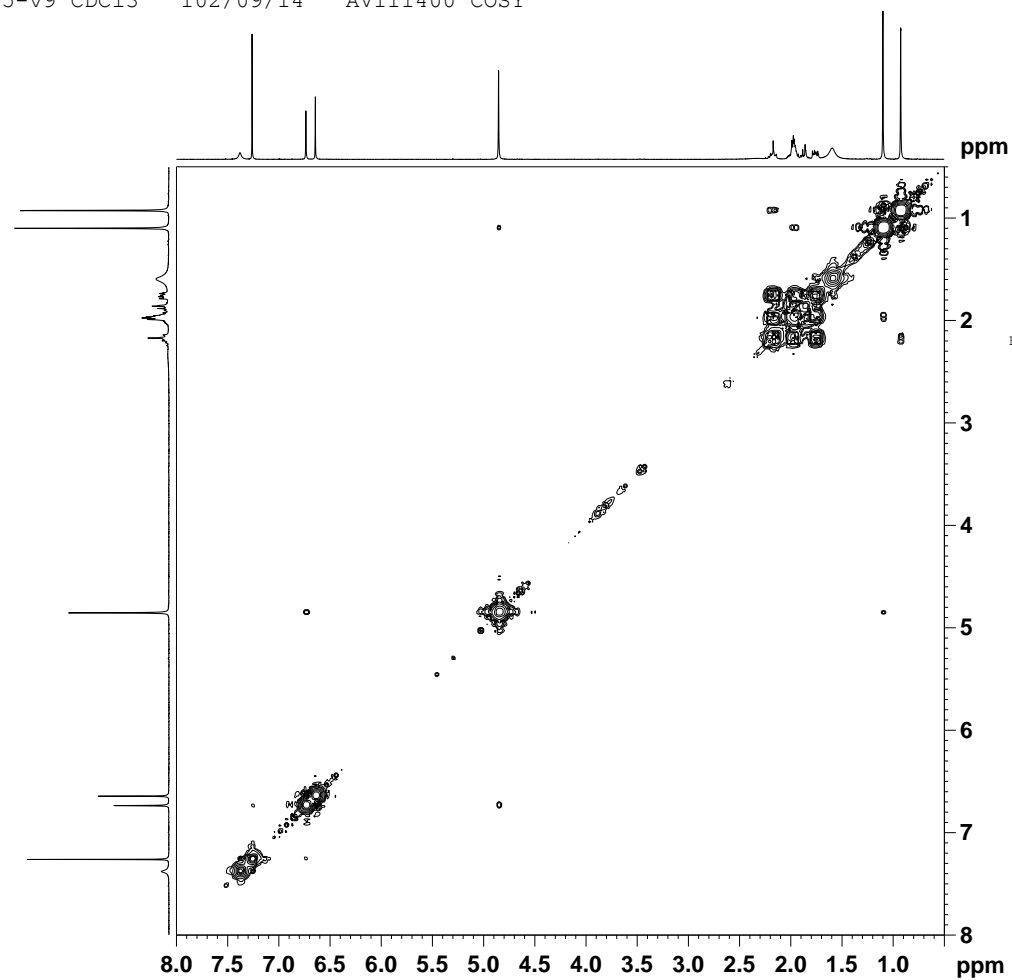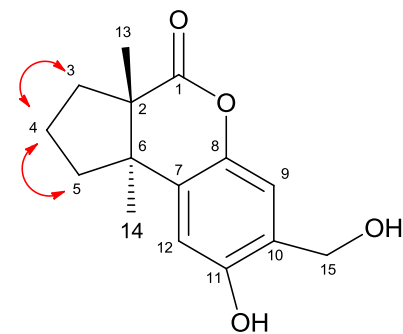

FP-5-v9 CDC13 102/09/14 AVIII400 COSY

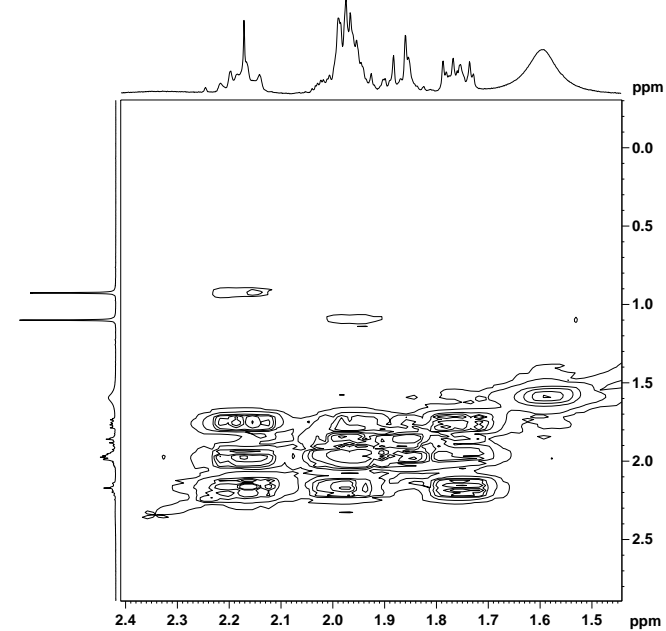

### S 4 HSQC spectrum and key of HSQC spectrum of fomitopin-A (1).

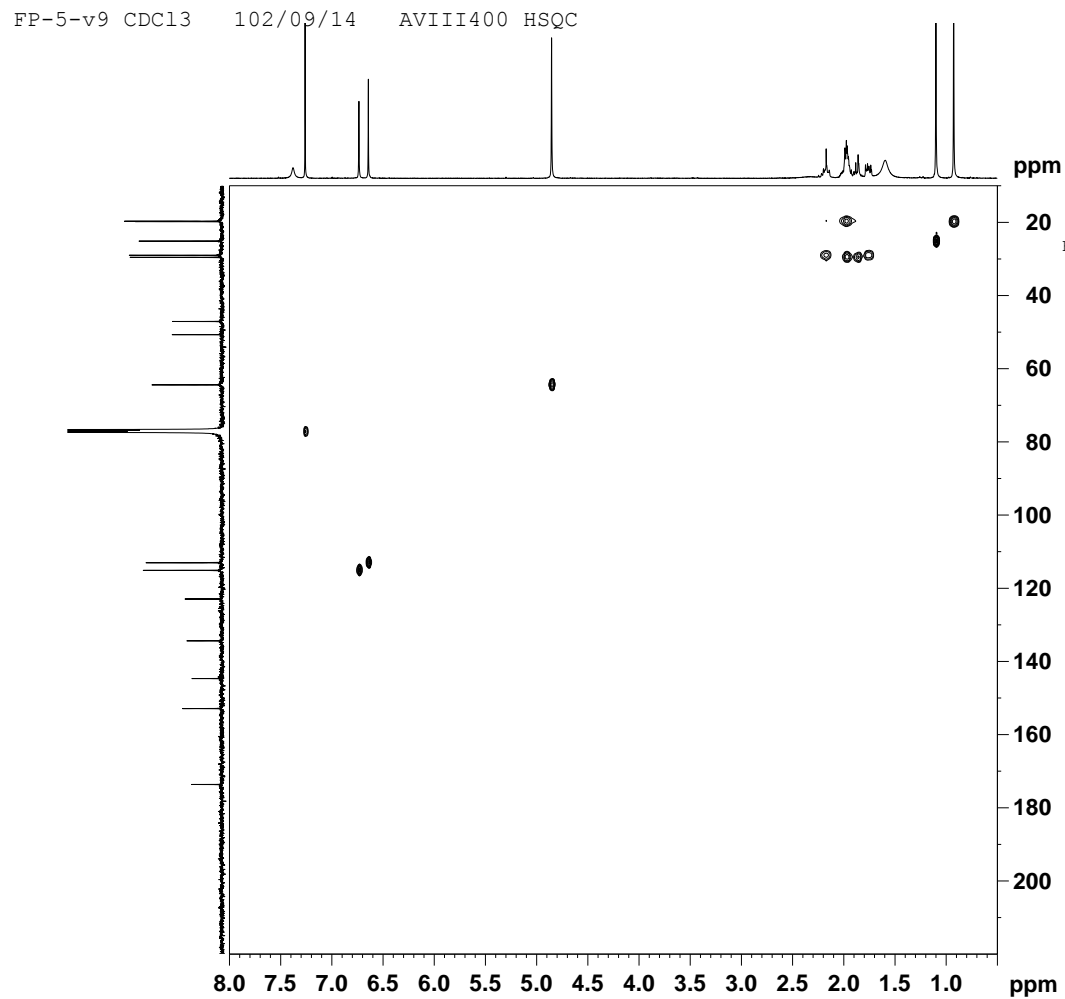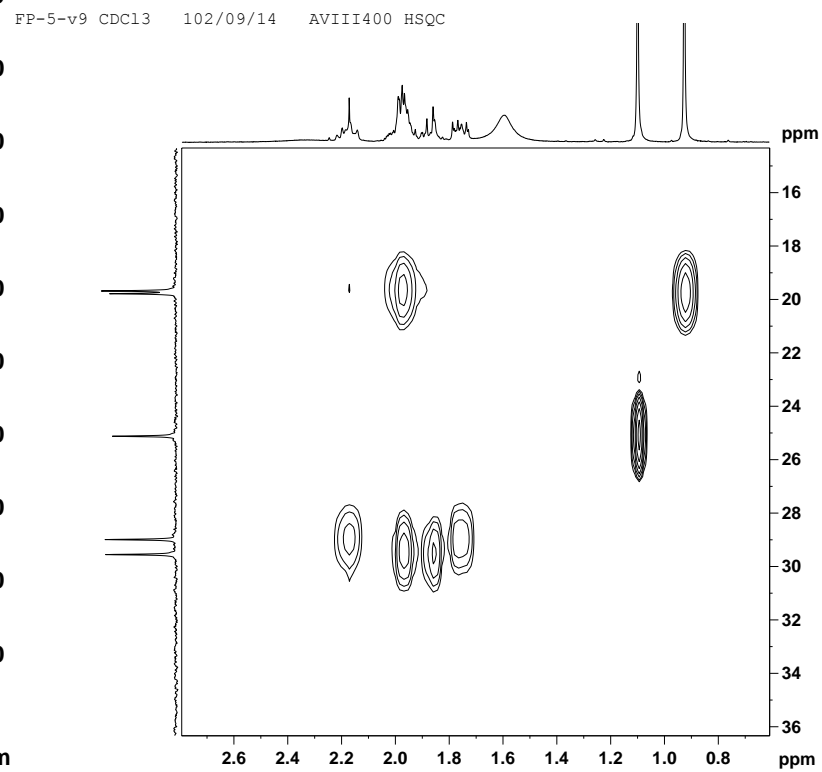

# S 5 HMBC spectrum of fomitopin-A (1).

FP-5-v9c CDCl3 102/09/14 AVIII400 HMBC

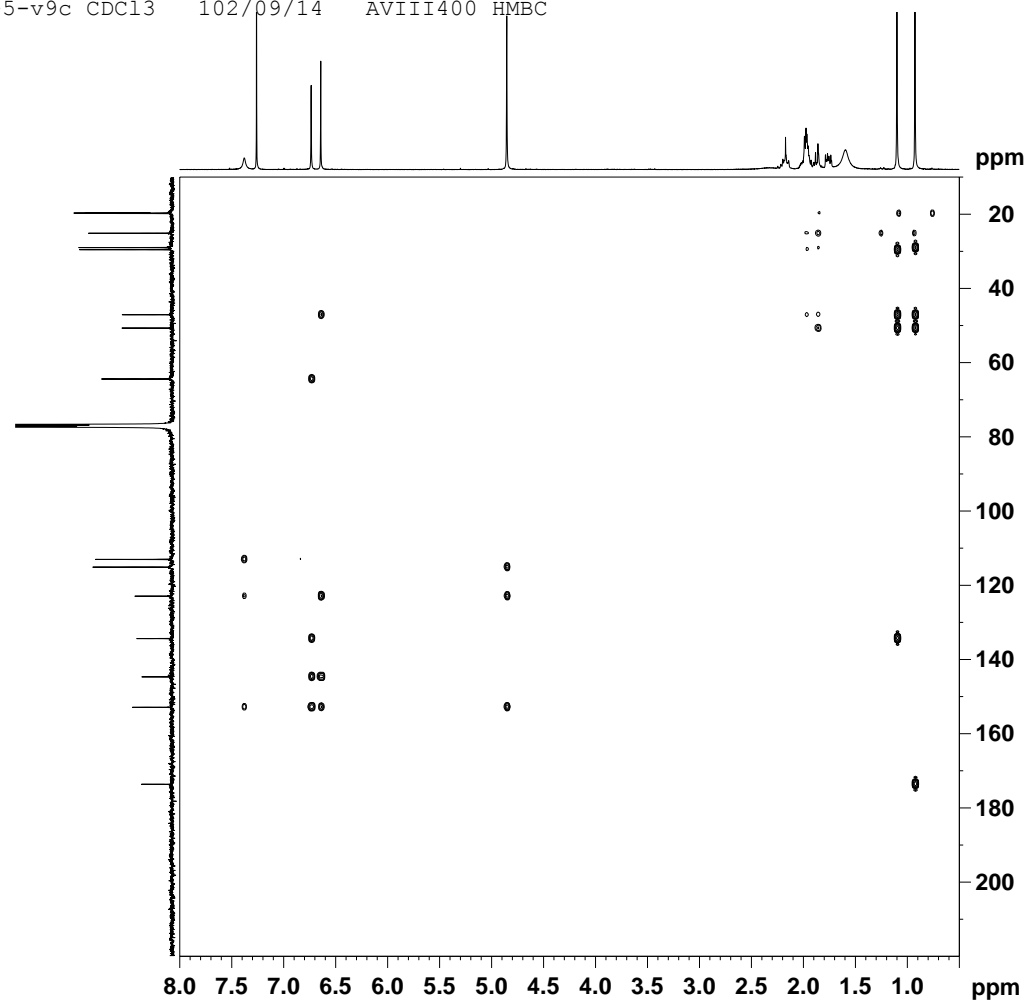

FP-5-v9c CDCl3 102/09/14 AVIII400 HMBC

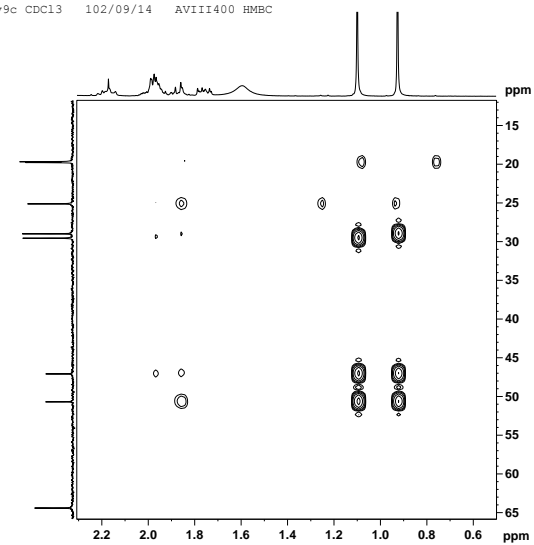

FP-5-v9c CDCl3 102/09/14 AVIII400 HMBC

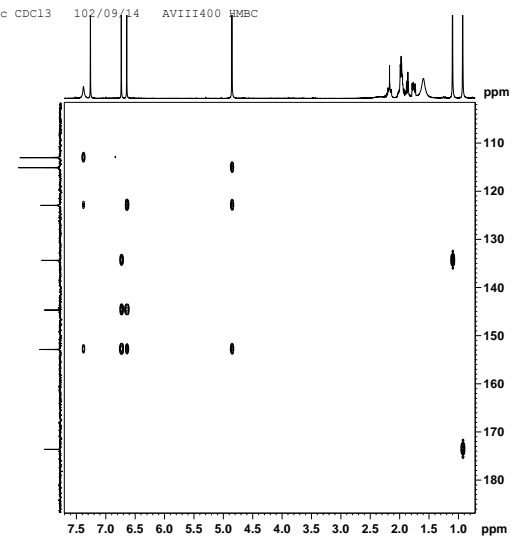

S 6 ECD spectrum of fomitopin-A (1).

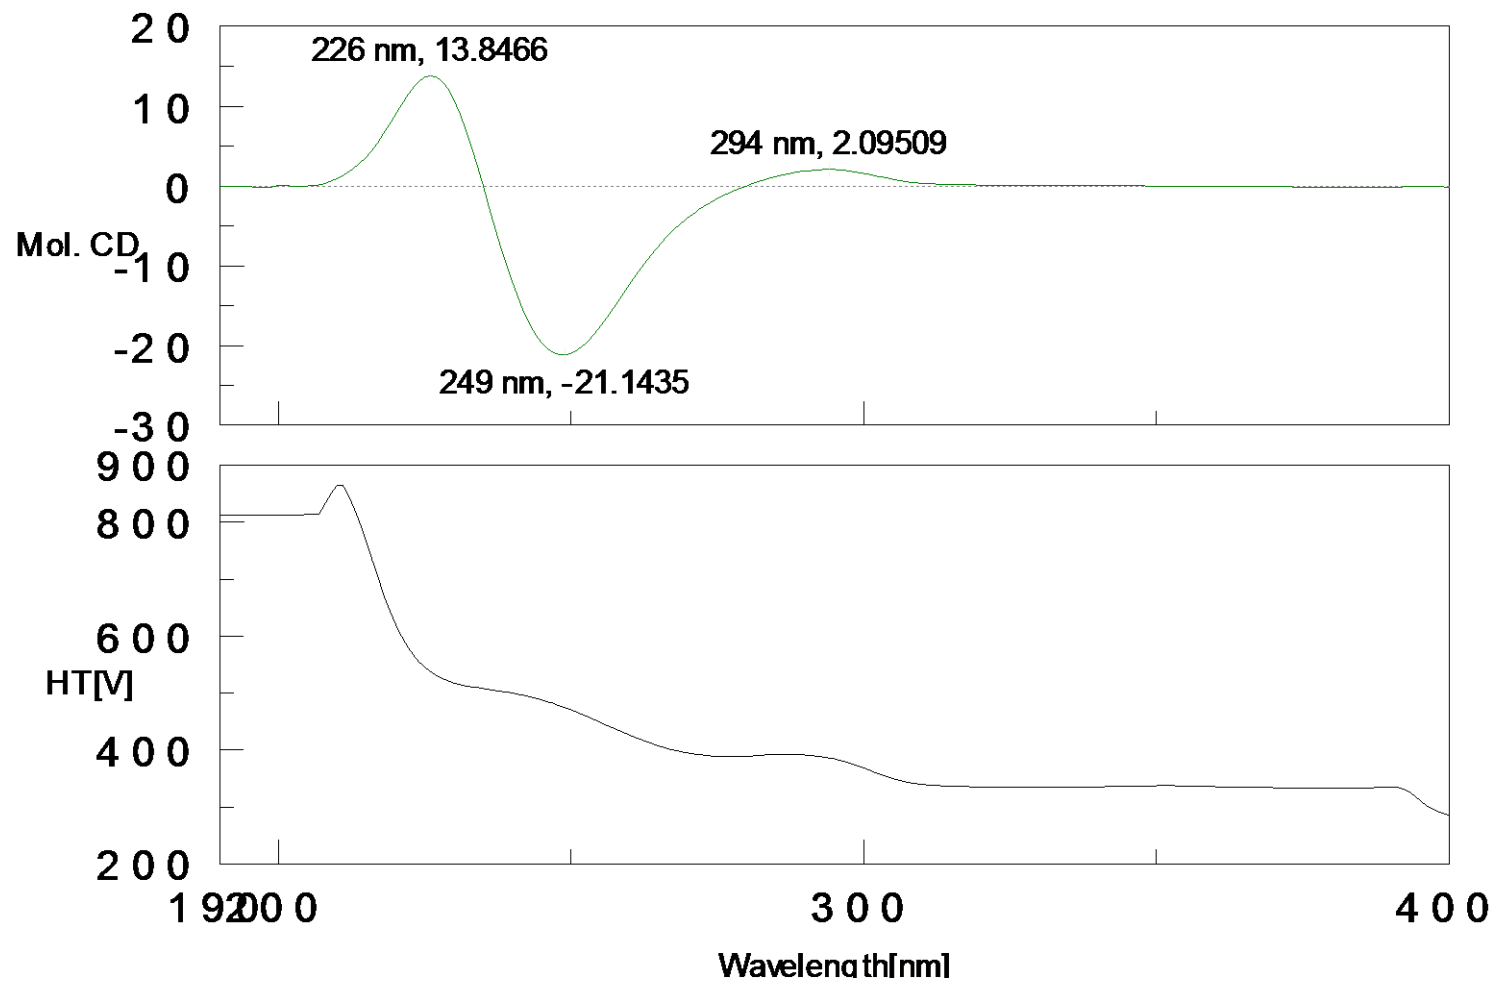

S 7 ORTEP drawing of fomitopin-A (1).

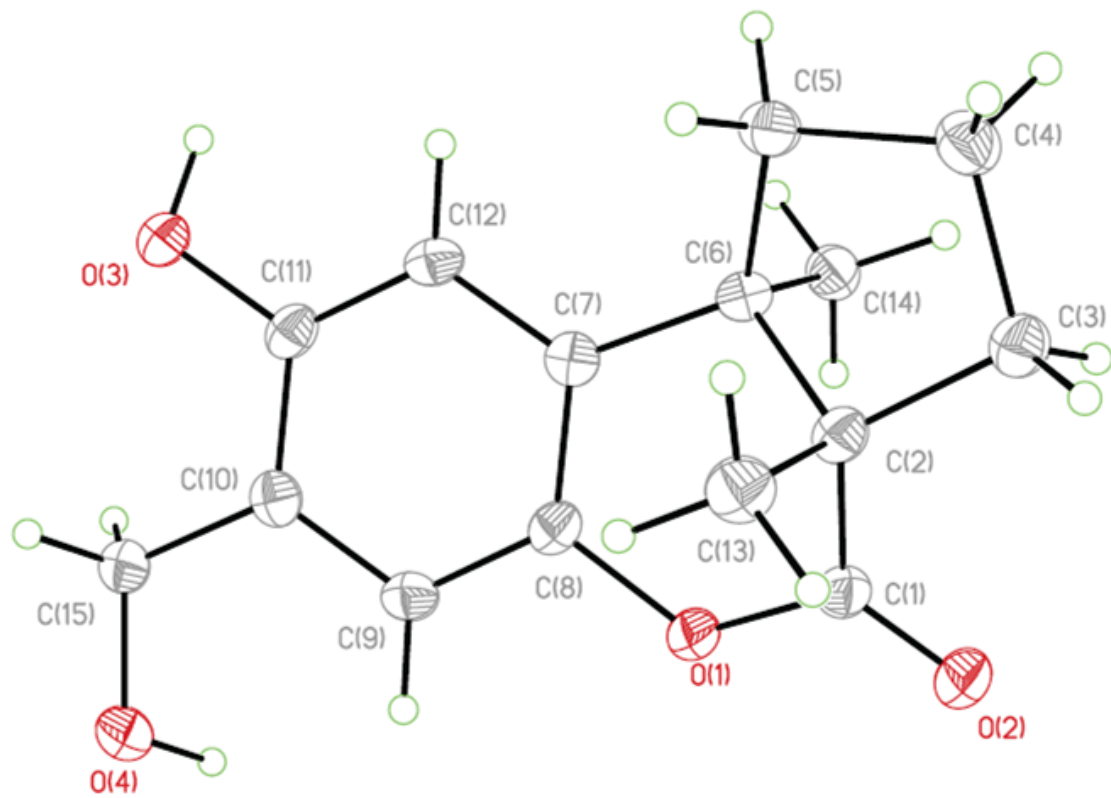

S 8 <sup>1</sup>H NMR (400 MHz, CDCl<sub>3</sub>) spectrum of fomitopin-B (2).

FP-6252-t7 CDCl<sub>3</sub> 103/08/02 AVIII400 (H1)

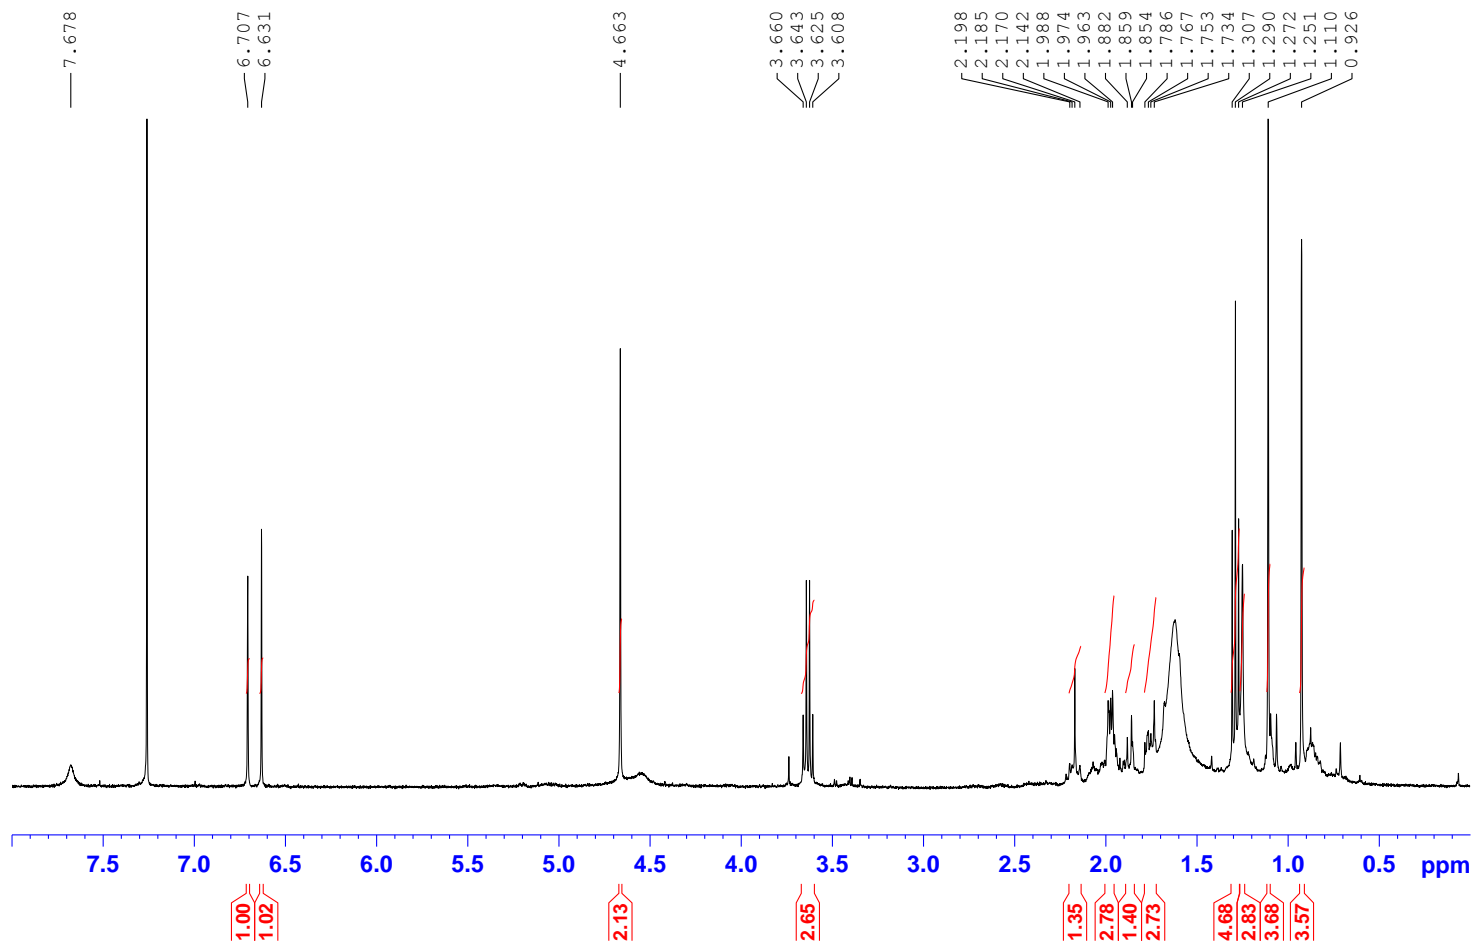

**S 9  $^{13}\text{C}$  NMR (100 MHz,  $\text{CDCl}_3$ ) spectrum of fomitopin-B (2).**

FP-6252-t7  $\text{CDCl}_3$  103/08/02 AVIII400 (C13)

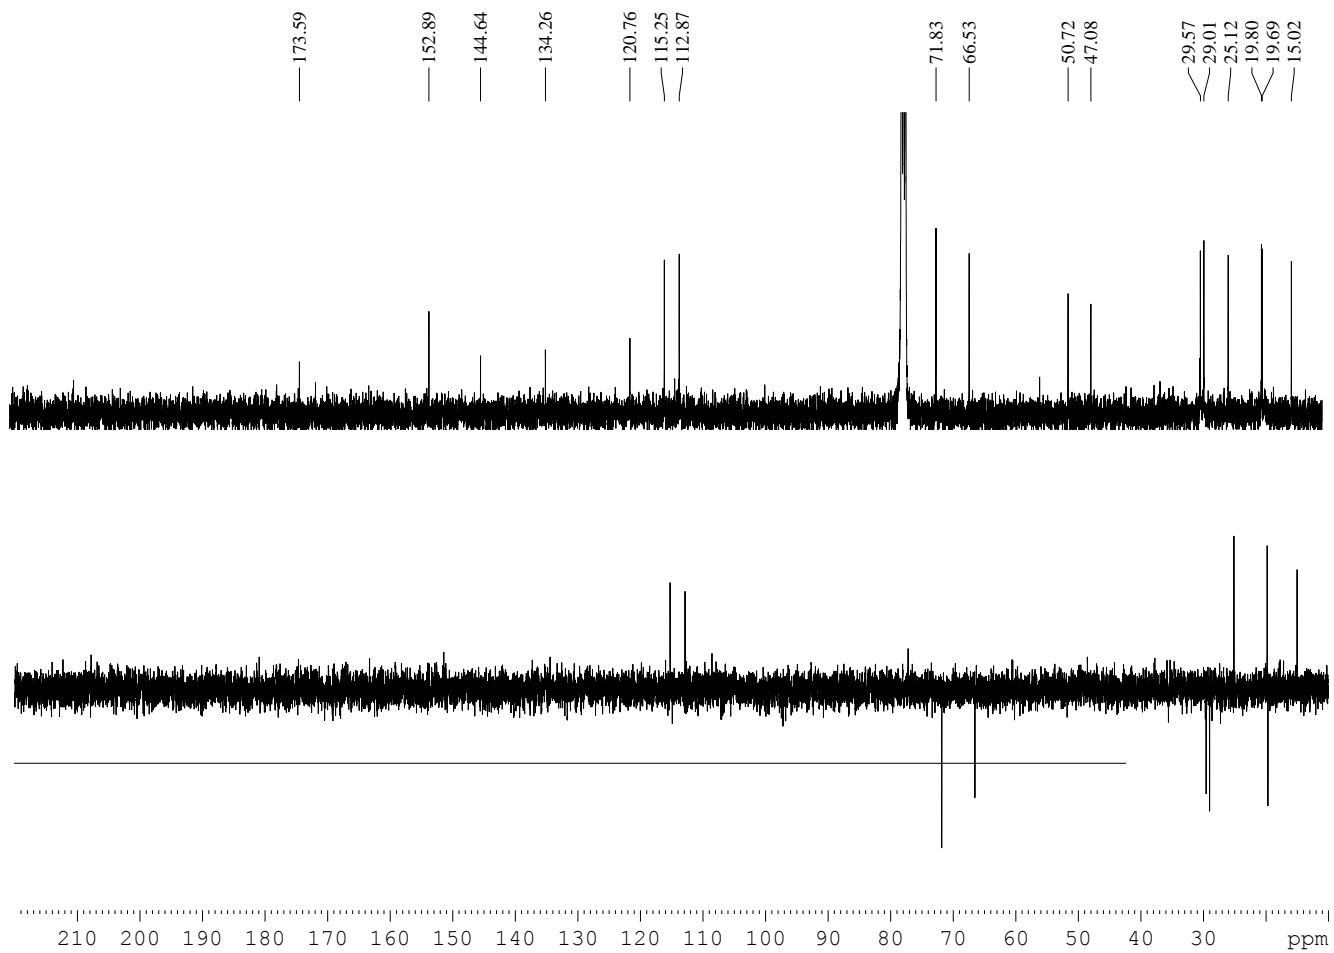

# S 10 COSY spectrum of fomitopin-B (2).

FP-6252-t7 CDC13 103/08/02 AVIII400 (COSY90)

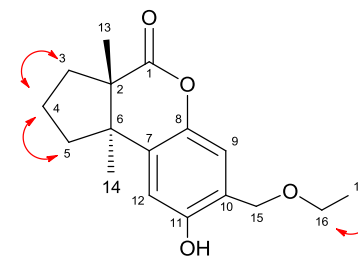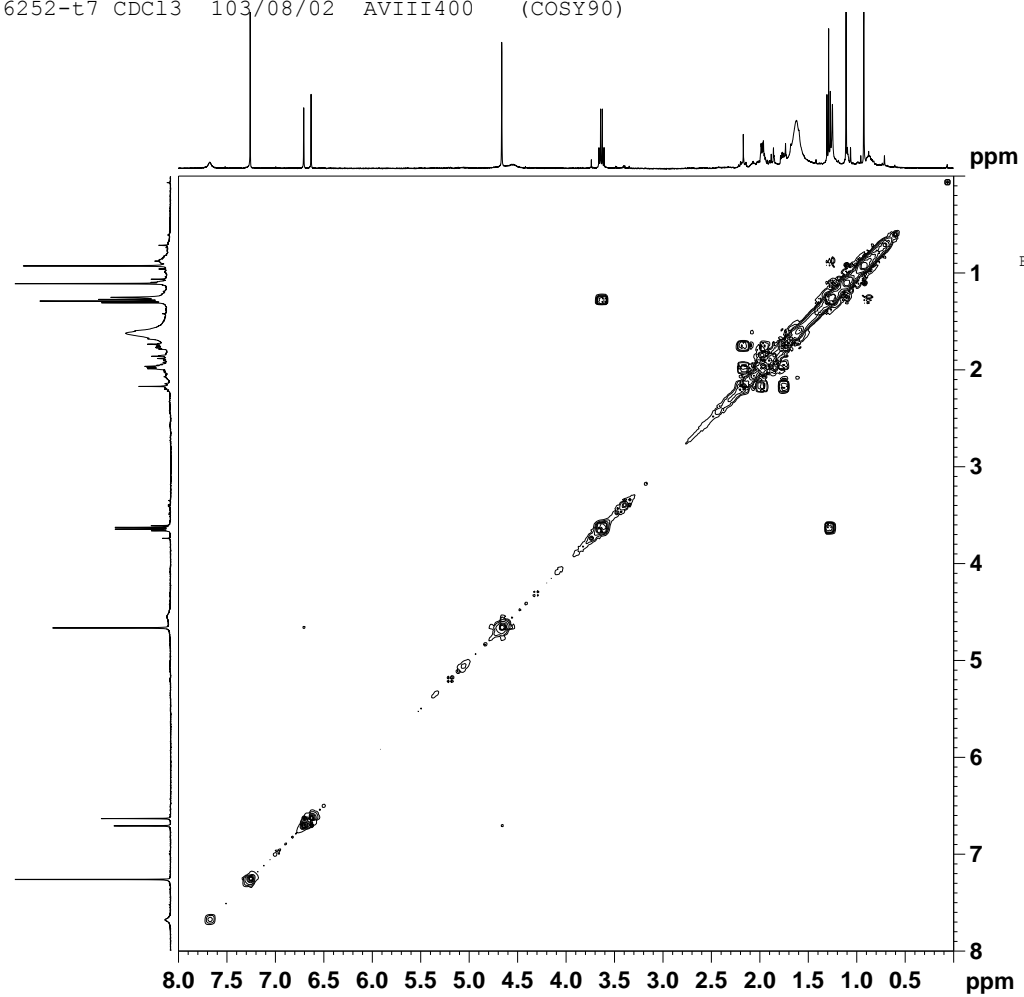

FP-6252-t7 CDC13 103/08/02 AVIII400 (COSY90)

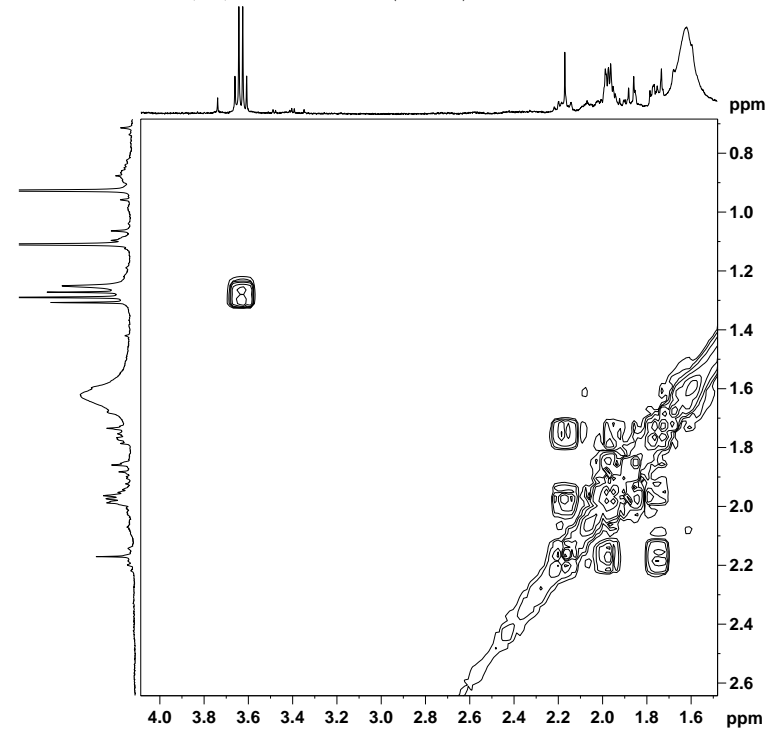



# S 11 HSQC spectrum and key of HSQC spectrum of fomitopin-B (2).

FP-6252-t7 CDC13 103/08/02 AVIII400 (HSQC)

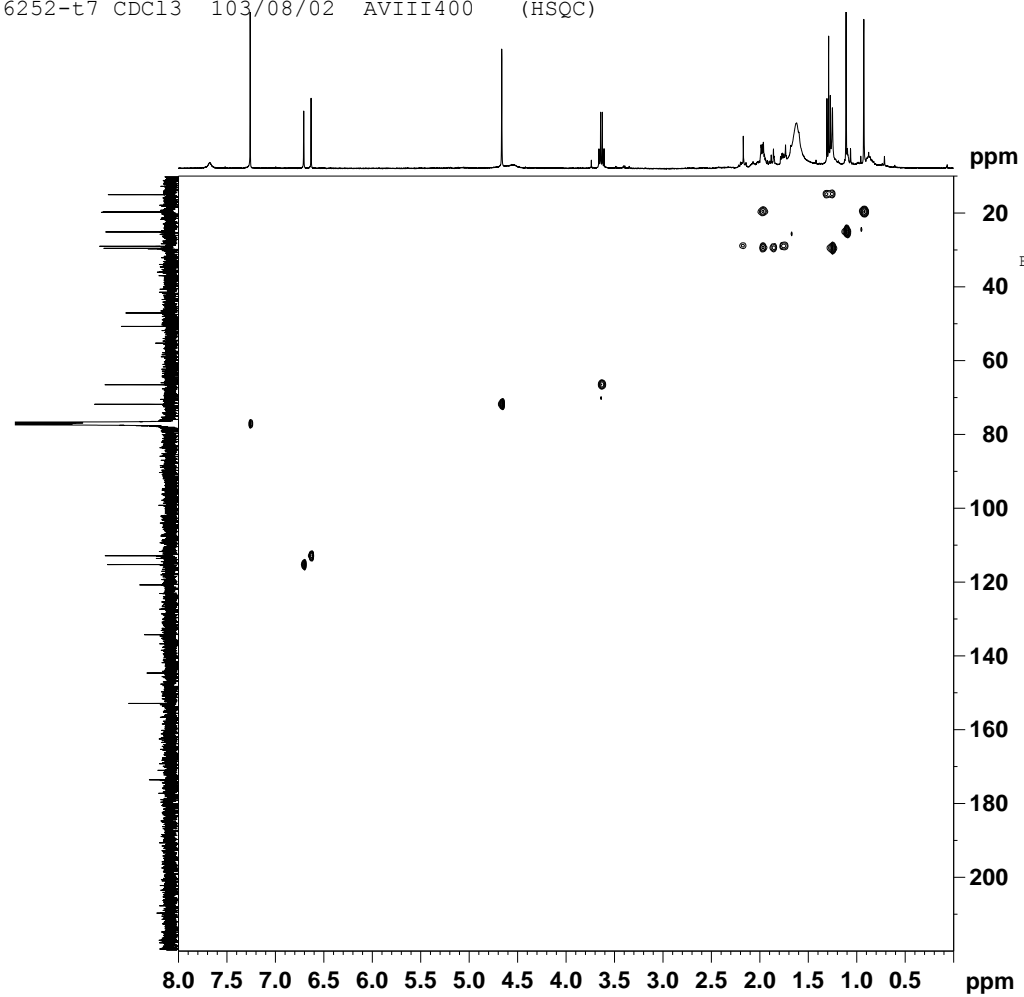

FP-6252-t7 CDC13 103/08/02 AVIII400 (HSQC)

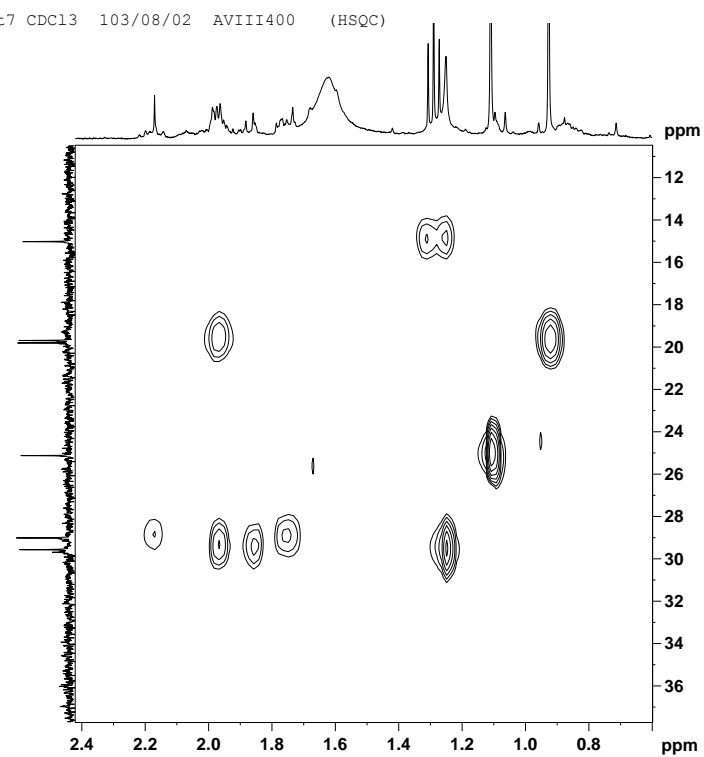

# S 12 HMBC spectrum of fomitopin-B (2).

FP-6252-t7 CDCl3 103/08/02 AVIII400 (HMBC)

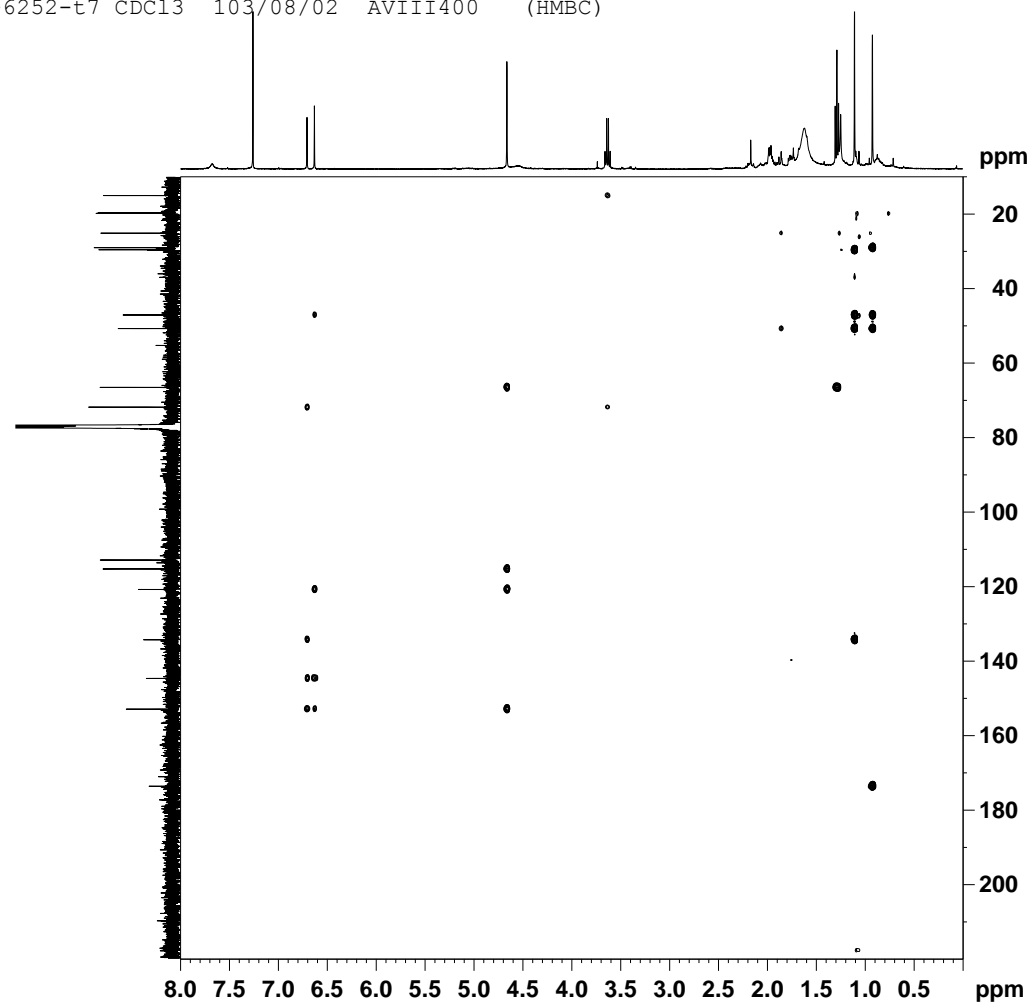

FP-6252-t7 CDCl3 103/08/02 AVIII400 (HMBC)

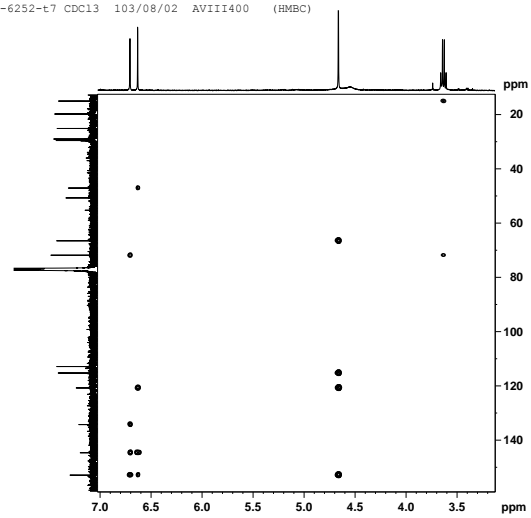

FP-6252-t7 CDCl3 108/08/02 AVIII400 (HMBC)

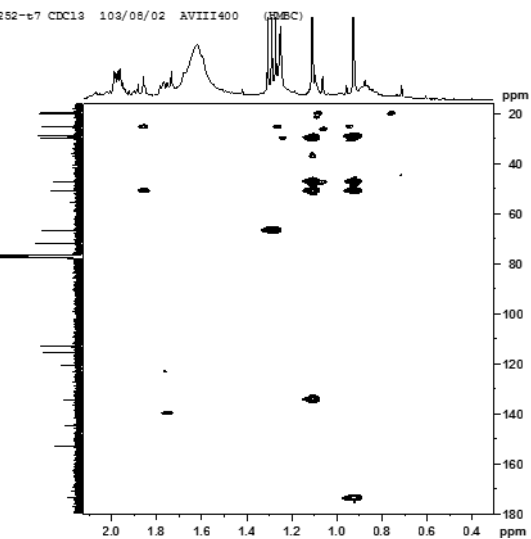

S 13 ECD spectrum of fomitopin-B (2).

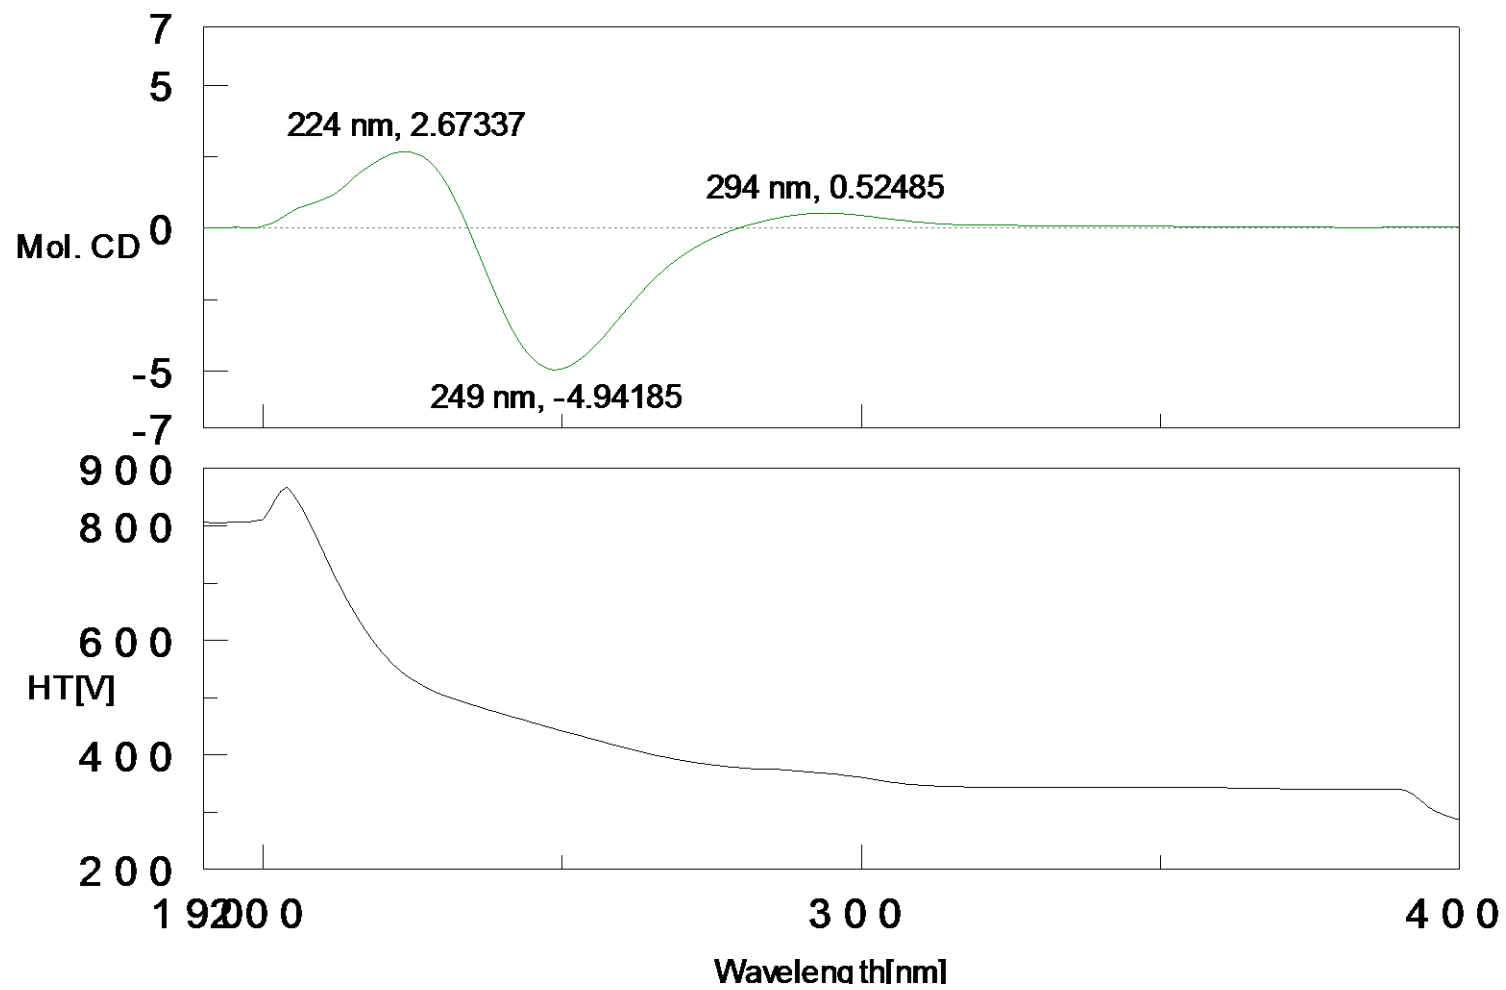

S 14 <sup>1</sup>H NMR (400 MHz, Acetone-d<sub>6</sub>) spectrum of fomitopin-C (3).

FP-5-7-5C (HPLC) Acetone-d<sub>6</sub> 103/1/28 AVIII400 (H1)

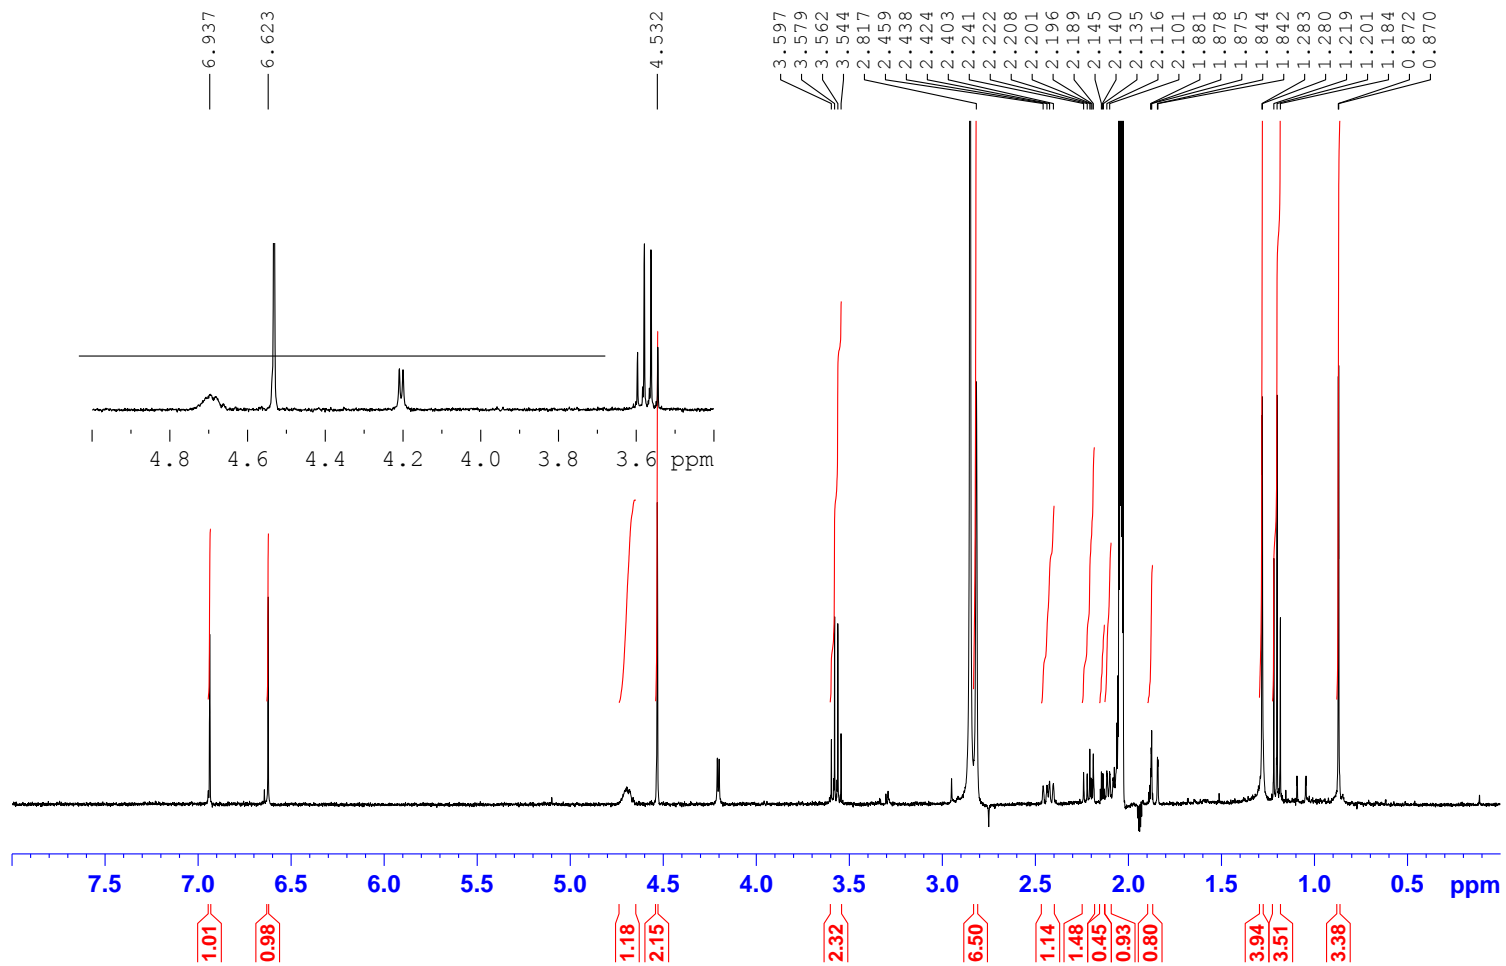

S 15 <sup>13</sup>C NMR (100 MHz, Acetone-d<sub>6</sub>) spectrum of fomitopin- C (3).

FP5-7-5C (HPLC) Acetone-d<sub>6</sub> 2014/01/28 AV700 C13

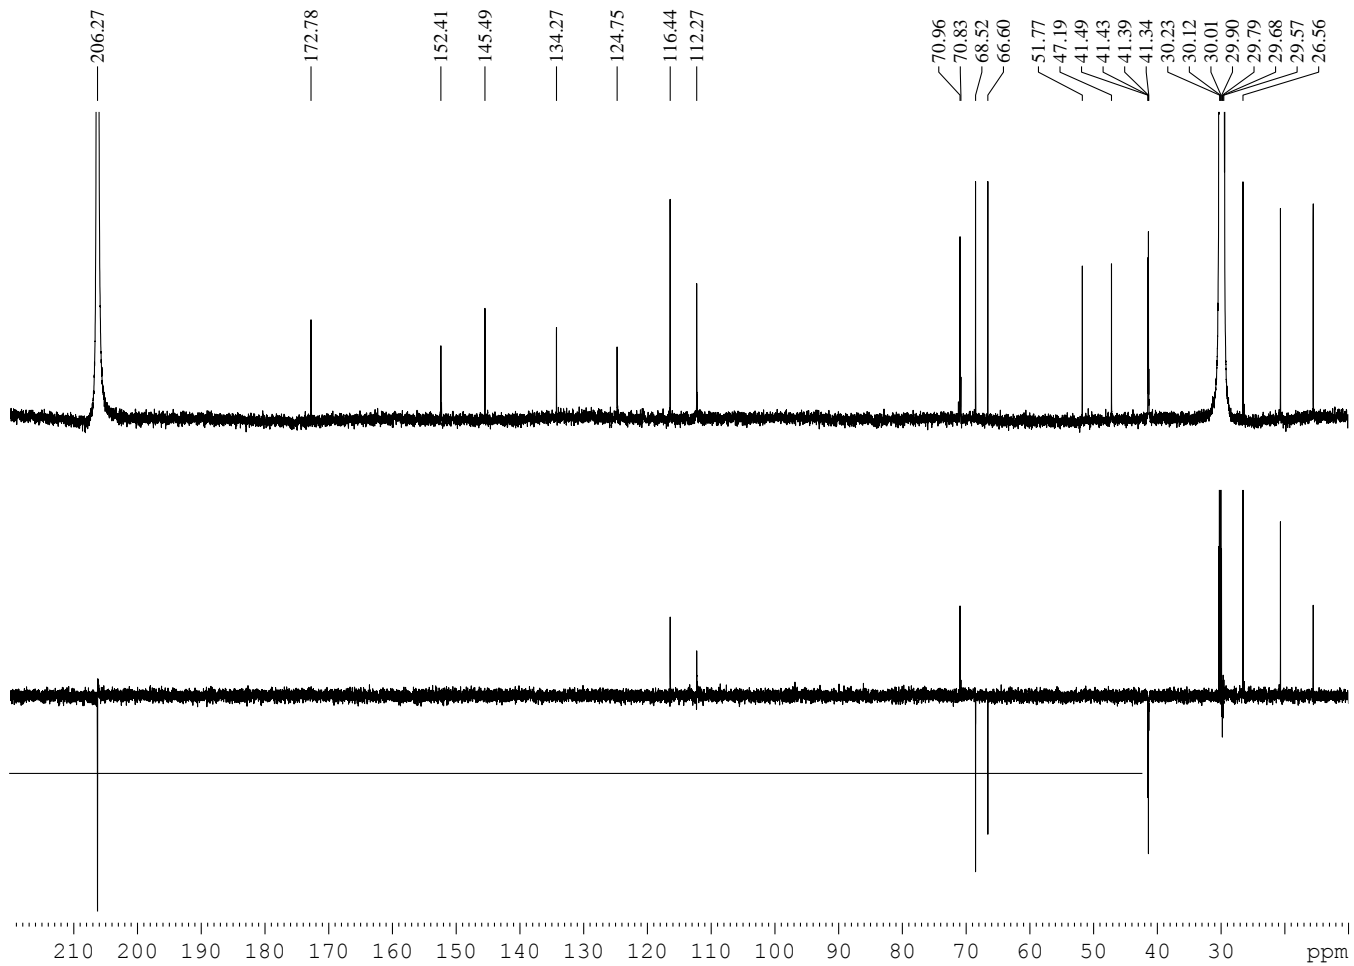

**S 16 COSY spectrum of fomitopin-C (3).**

FP-5-7-5C Acetone-d6 103/7/31 AVIII400 (COSY90)

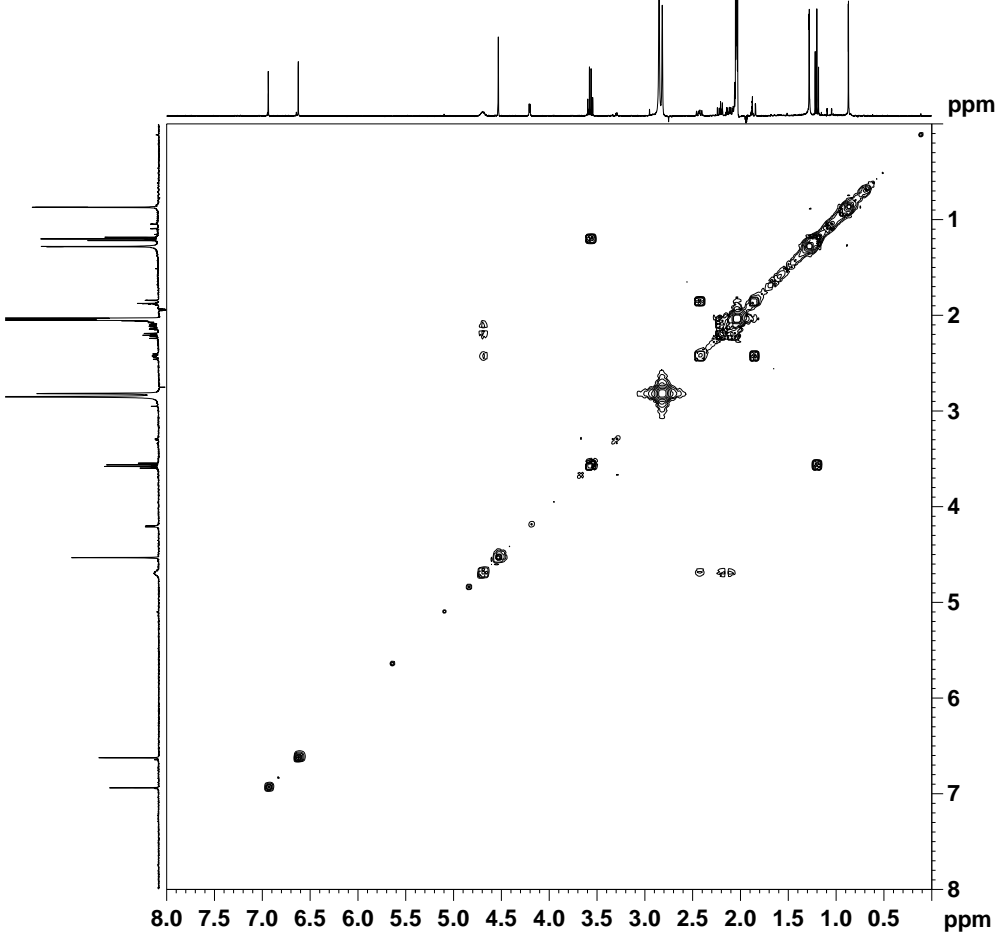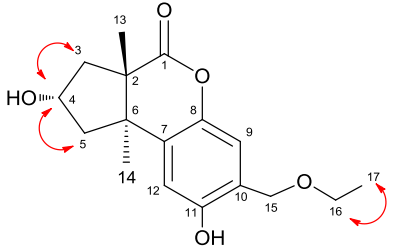

### S 17 NOESY spectrum of fomitopin-C (3).

FP-5-7-5C Acetone-d6 103/7/31 AVIII400 (NOESY)

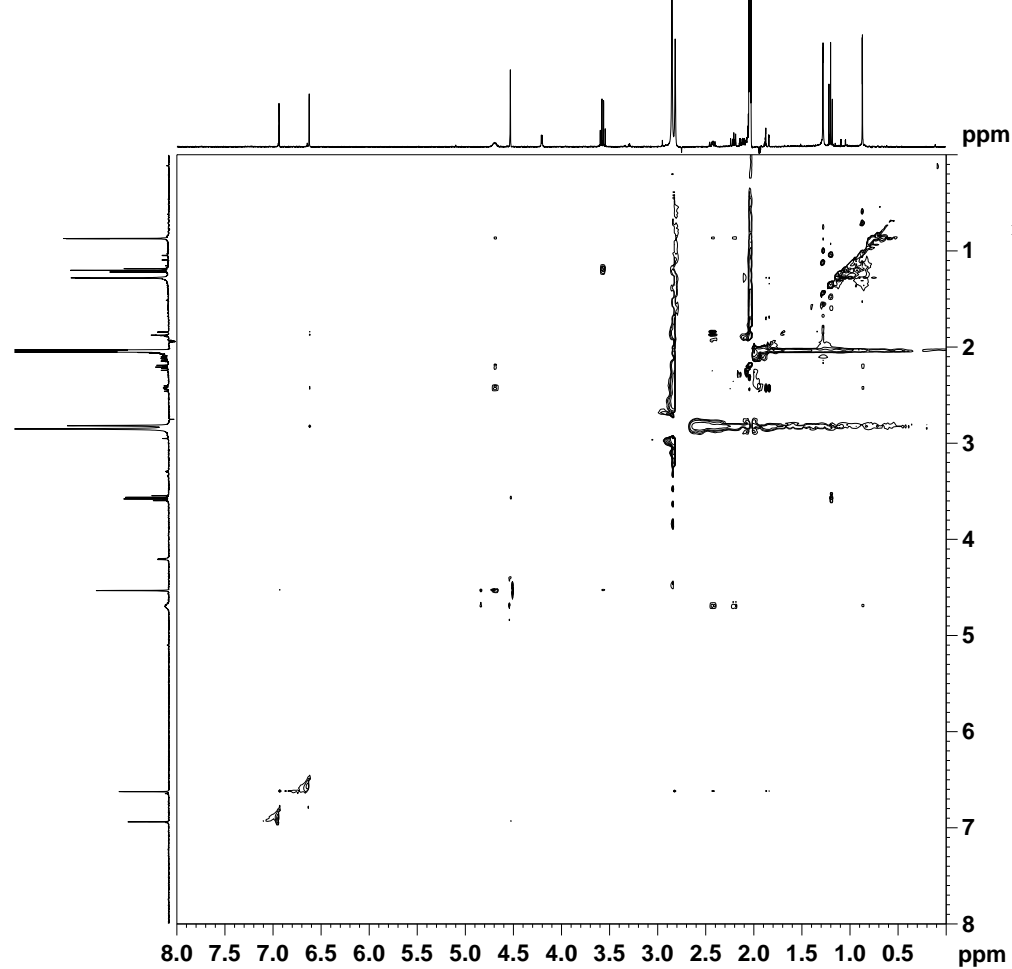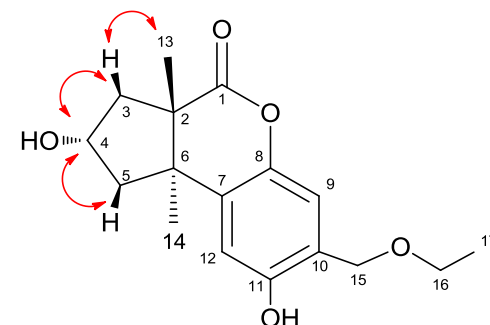

FP-5-7-5C Acetone-d6 103/7/31 AVIII400 (NOESY)

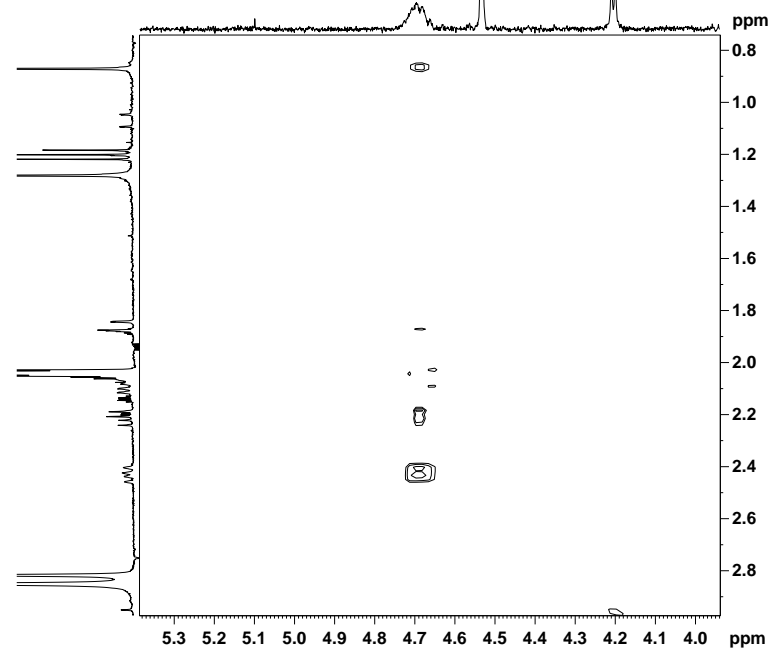

### S 18 HSQC spectrum and key of HSQC spectrum of fomitopin-C (3).

FP-5-7-5C Acetone-d6 103/7/31 AVIII400 (HSQC)

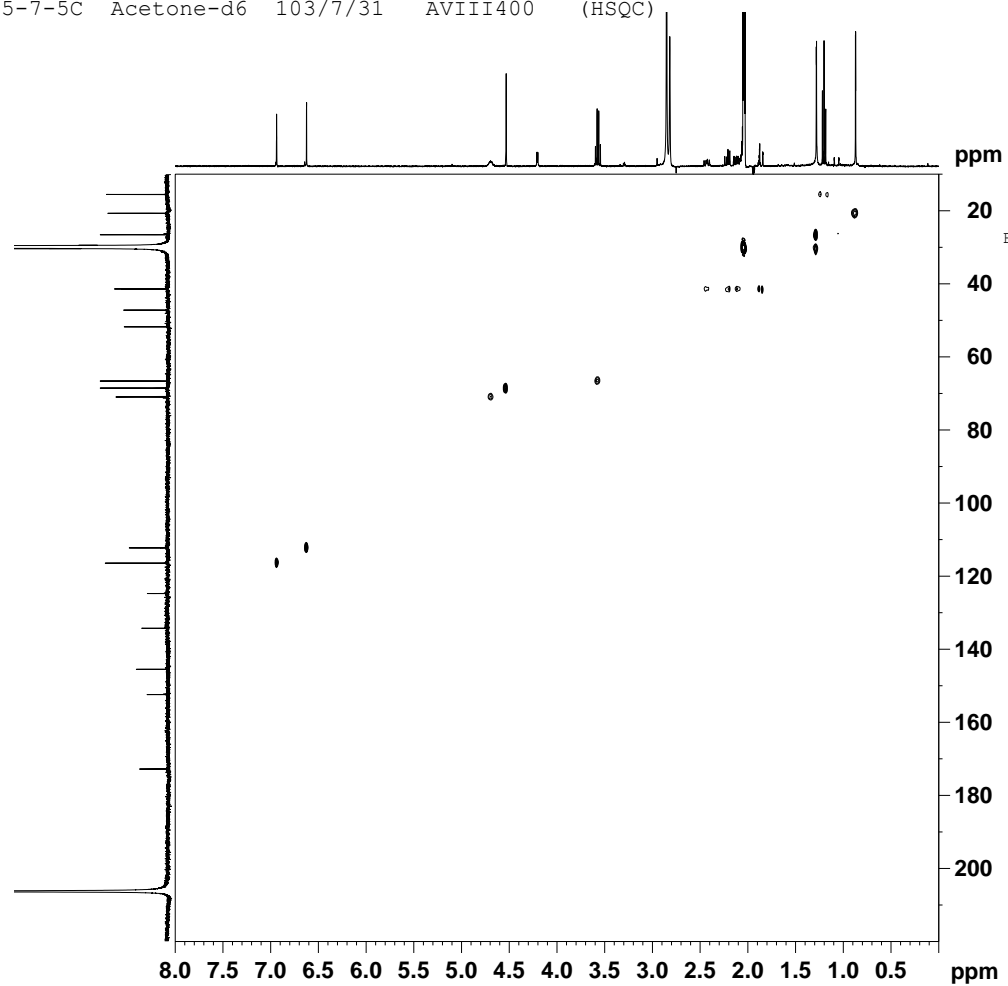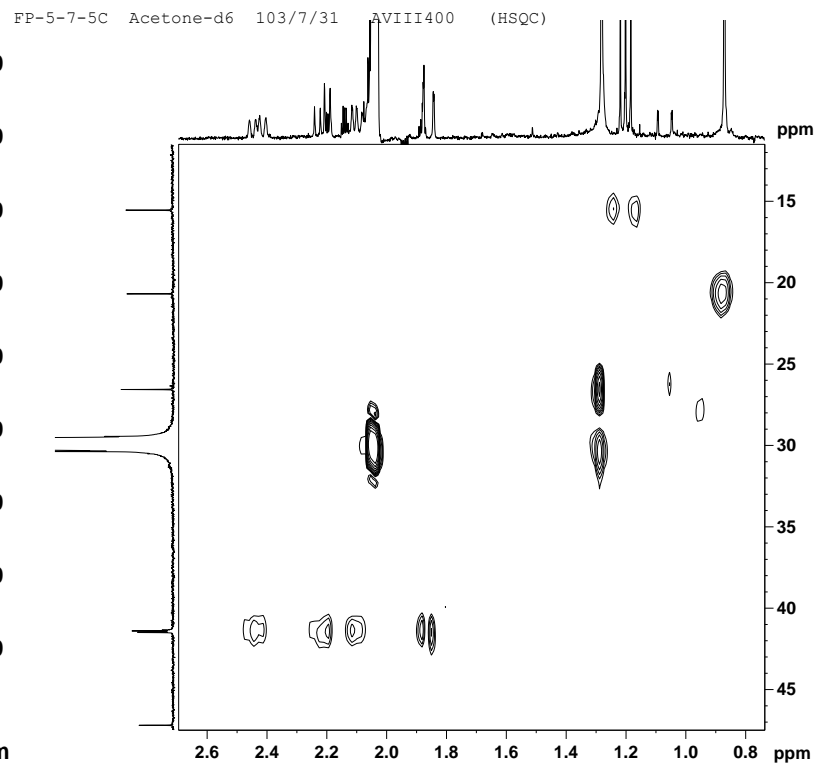



### S 19 HMBC spectrum of fomitopin-C (3).

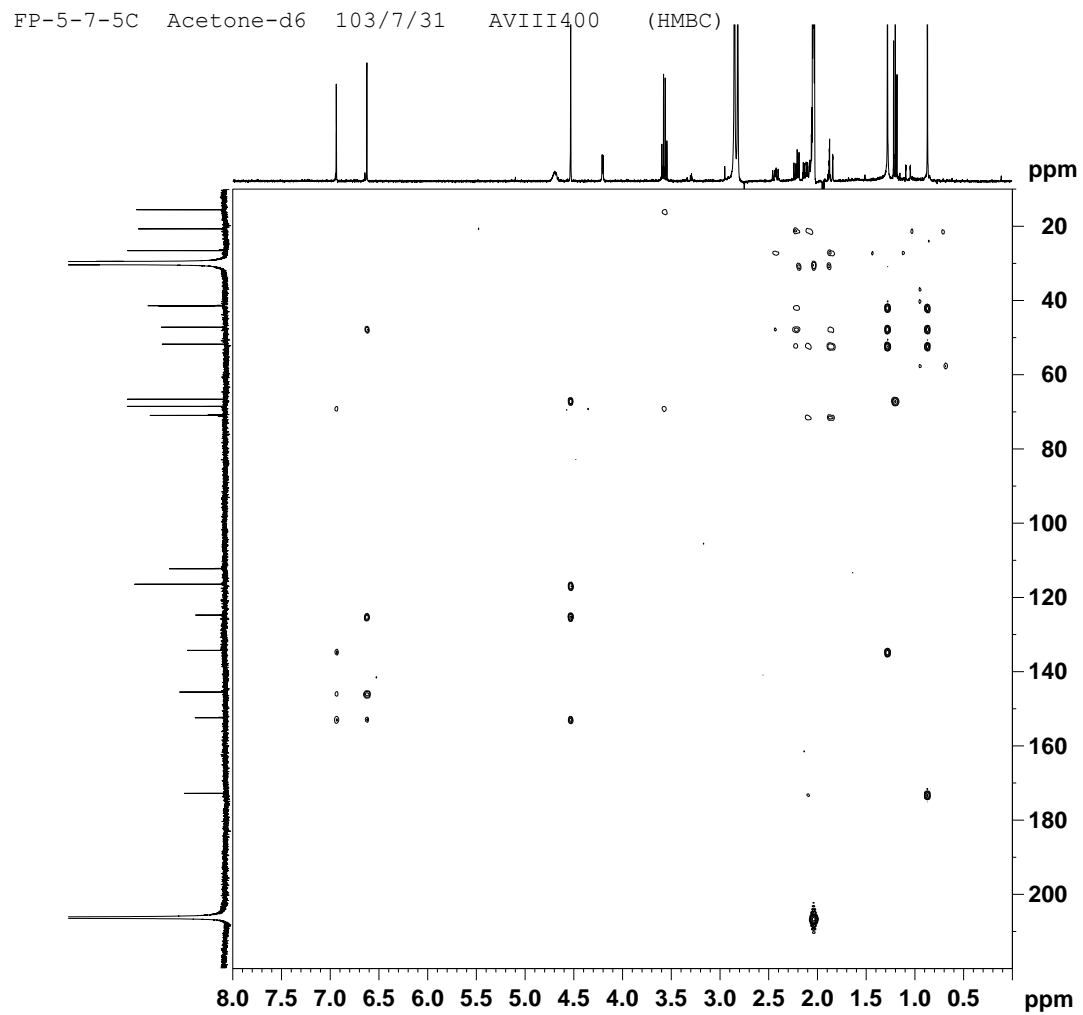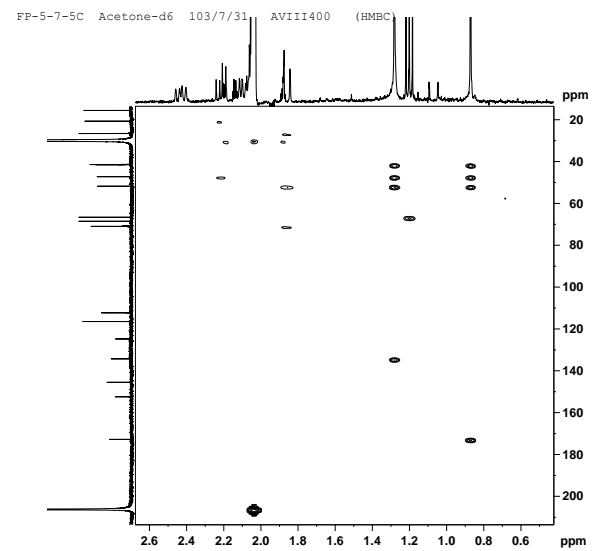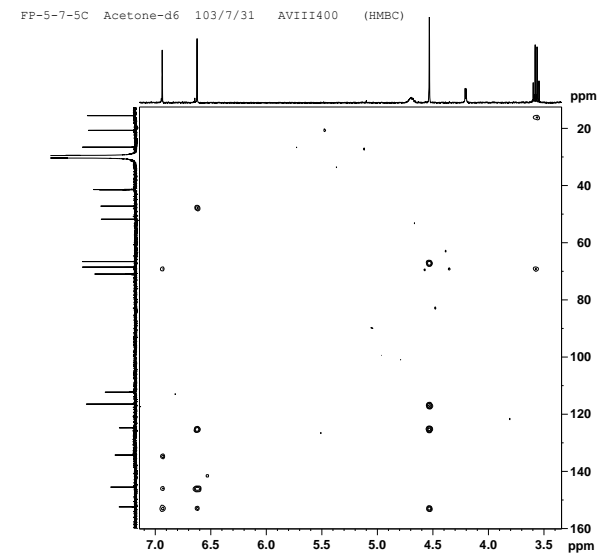

S 20 ECD spectrum of fomitopin-C (3).

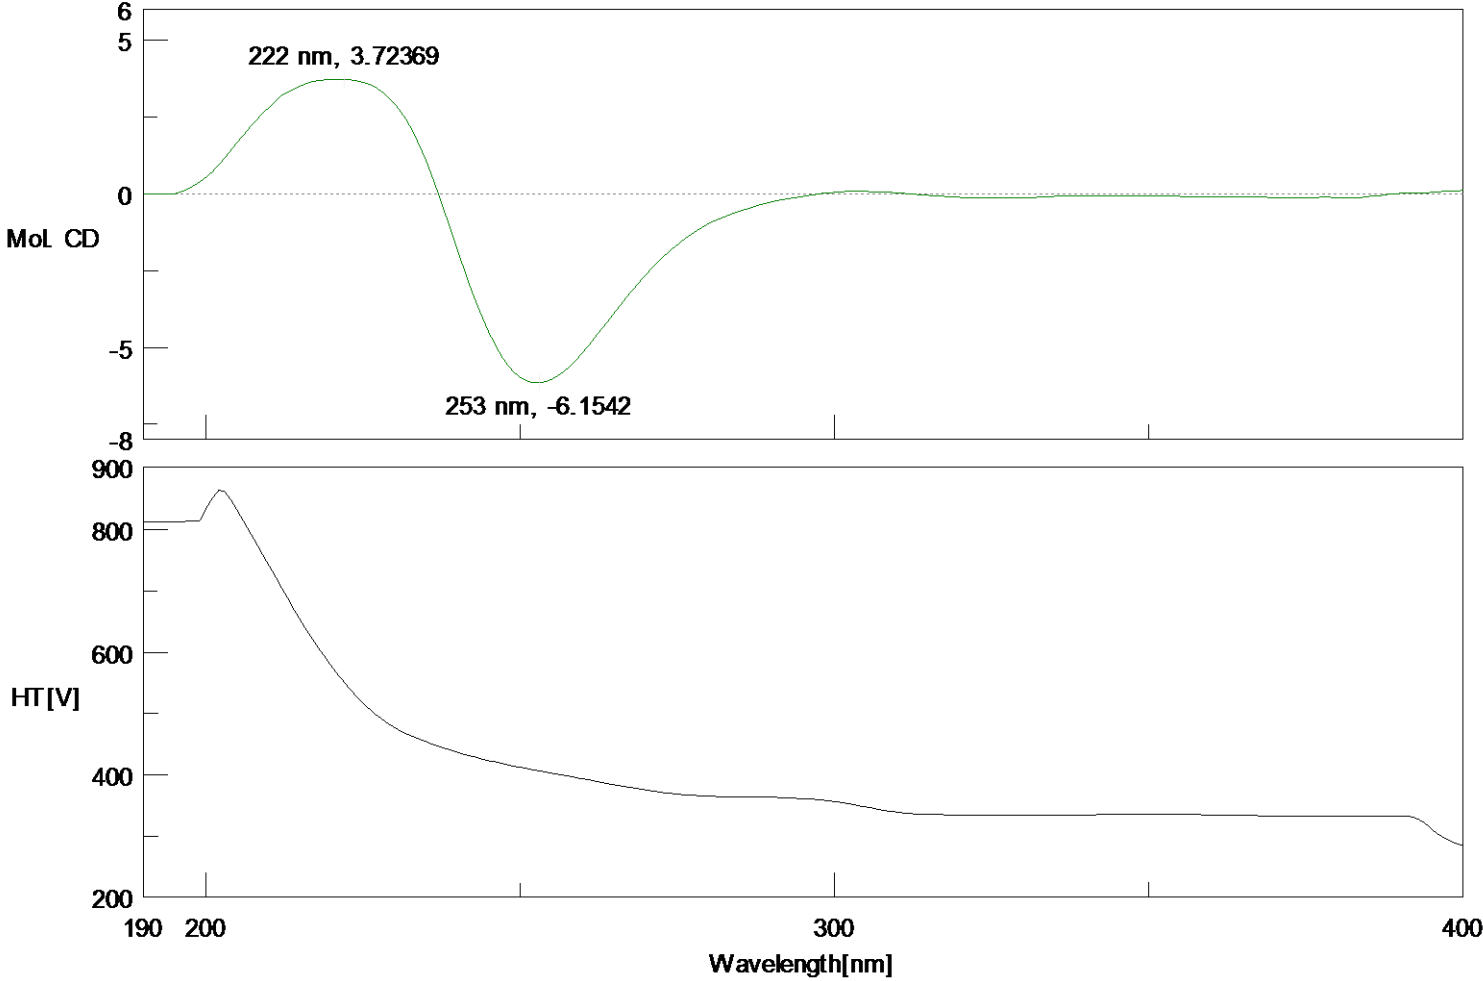

S 21 <sup>1</sup>H NMR (400 MHz, CDCl<sub>3</sub>) spectrum of fomitopin-D (4).

FP-4-2+3-t3 CDCl<sub>3</sub> 104/05/21 AVIII400 (H1)

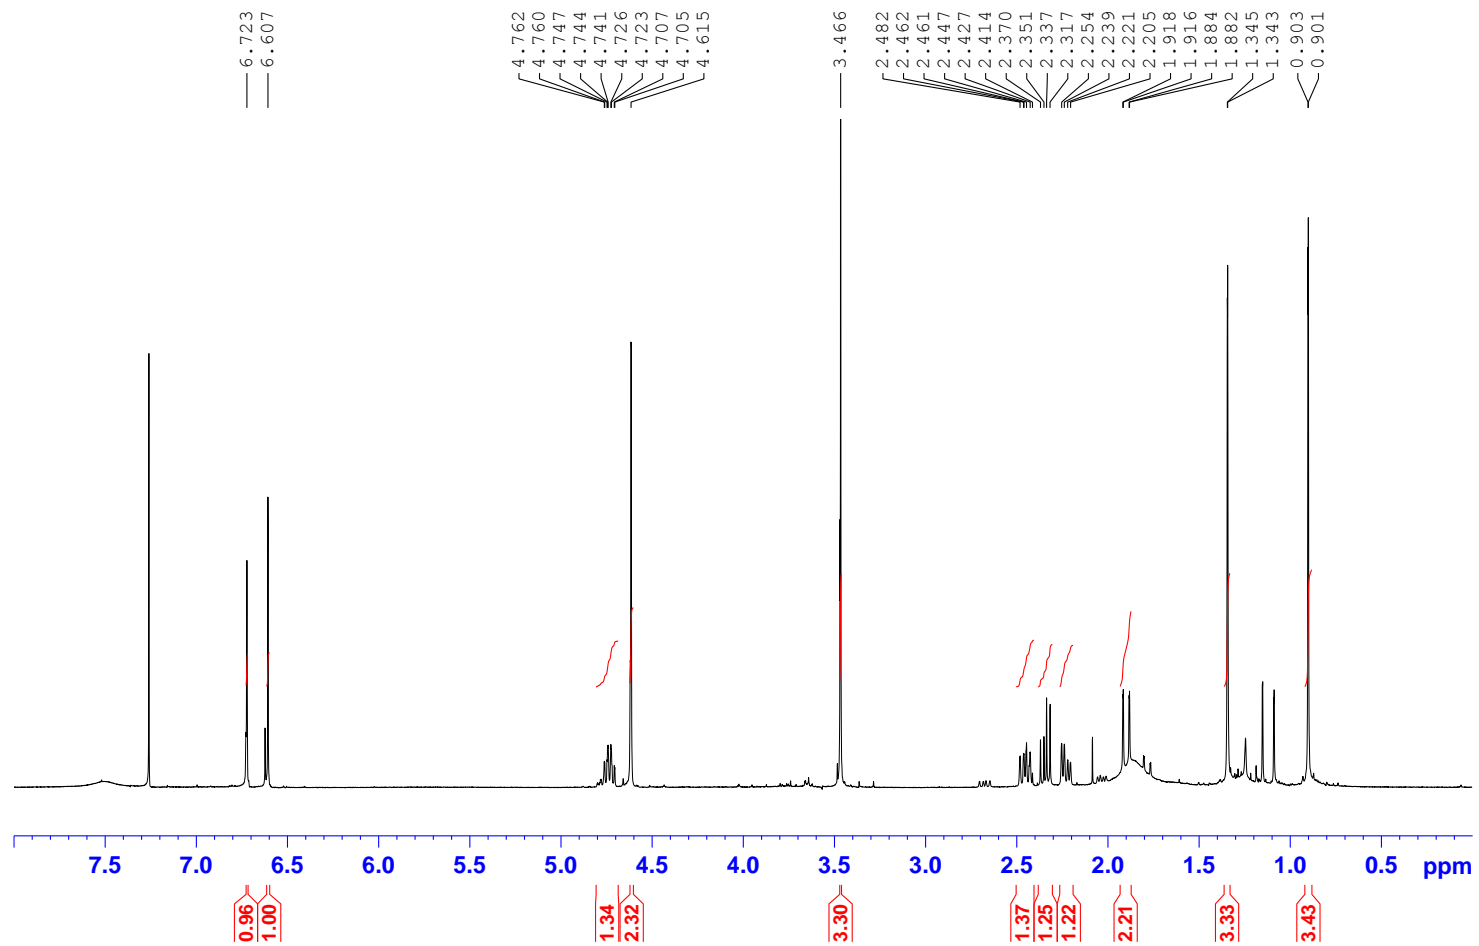

S 22 <sup>13</sup>C NMR (100 MHz, CDCl<sub>3</sub>) spectrum of fomitopin-D (4).

FP-4-2+3-t3 CDC13 104/05/21 AVIII400 (C13)

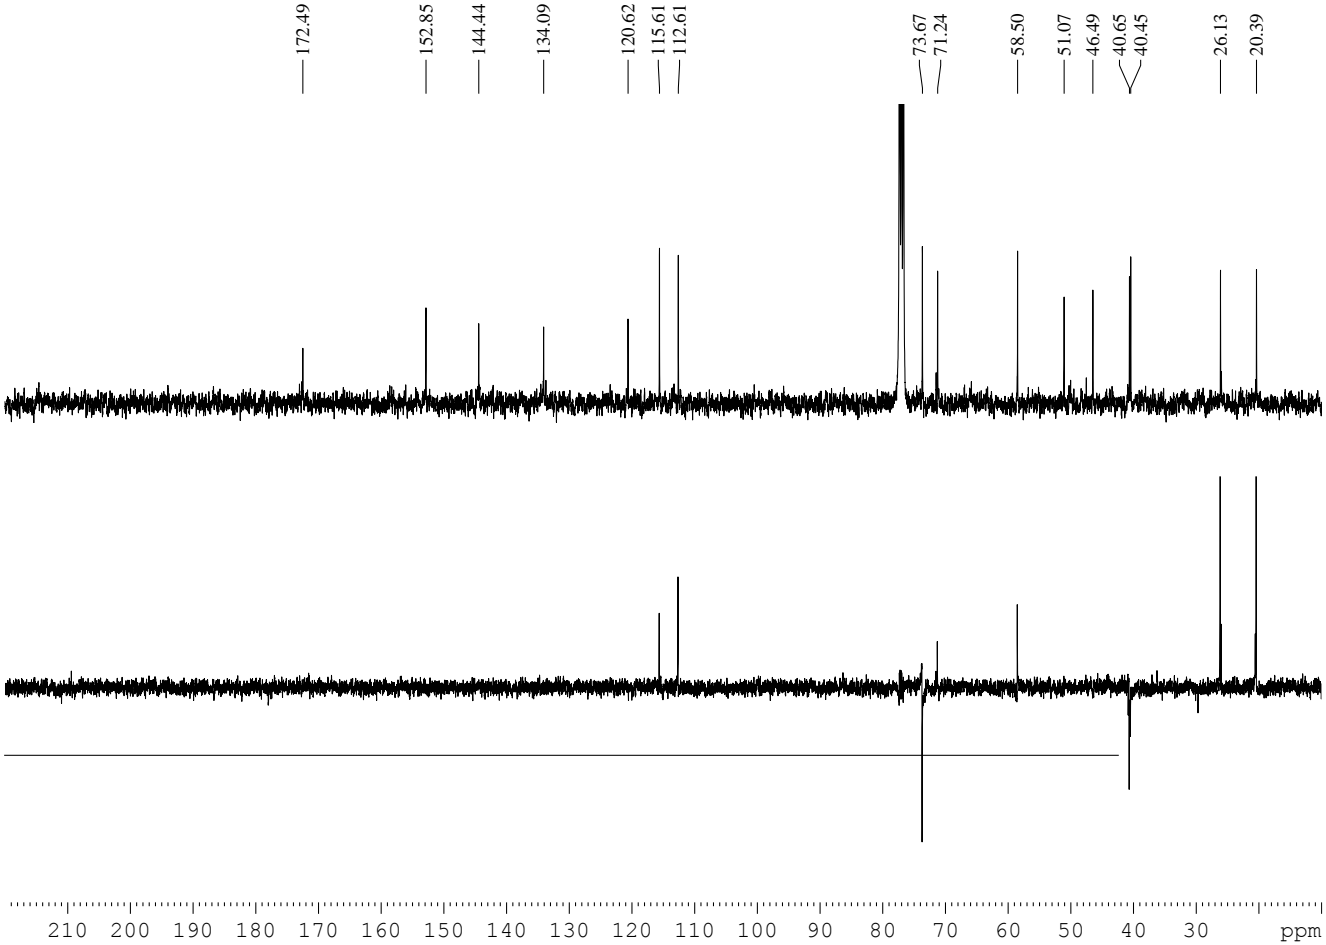

### S 23 COSY spectrum of fomitopin-D (4).

FP-4-2+3-t3 CDC13 104/05/21 AVIII400 (COSY90)

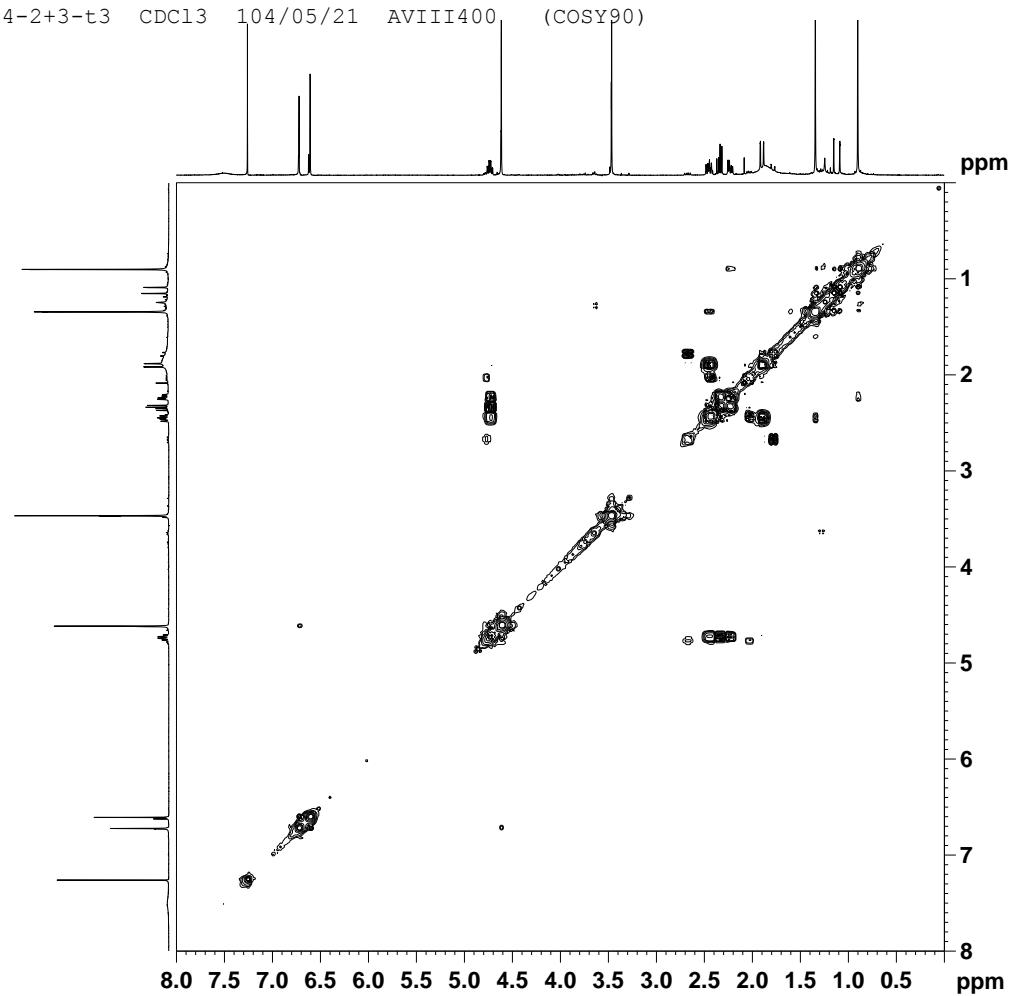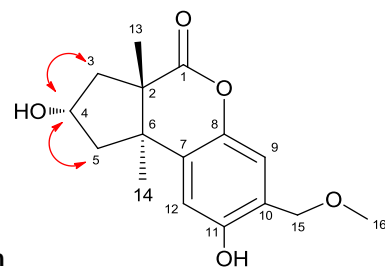

# S 24 NOESY spectrum and key of NOESY spectrum of fomitopin-D (4).

FP-4-2+3-t3 CDC13 104/05/21 AVIII400 (NOESY)

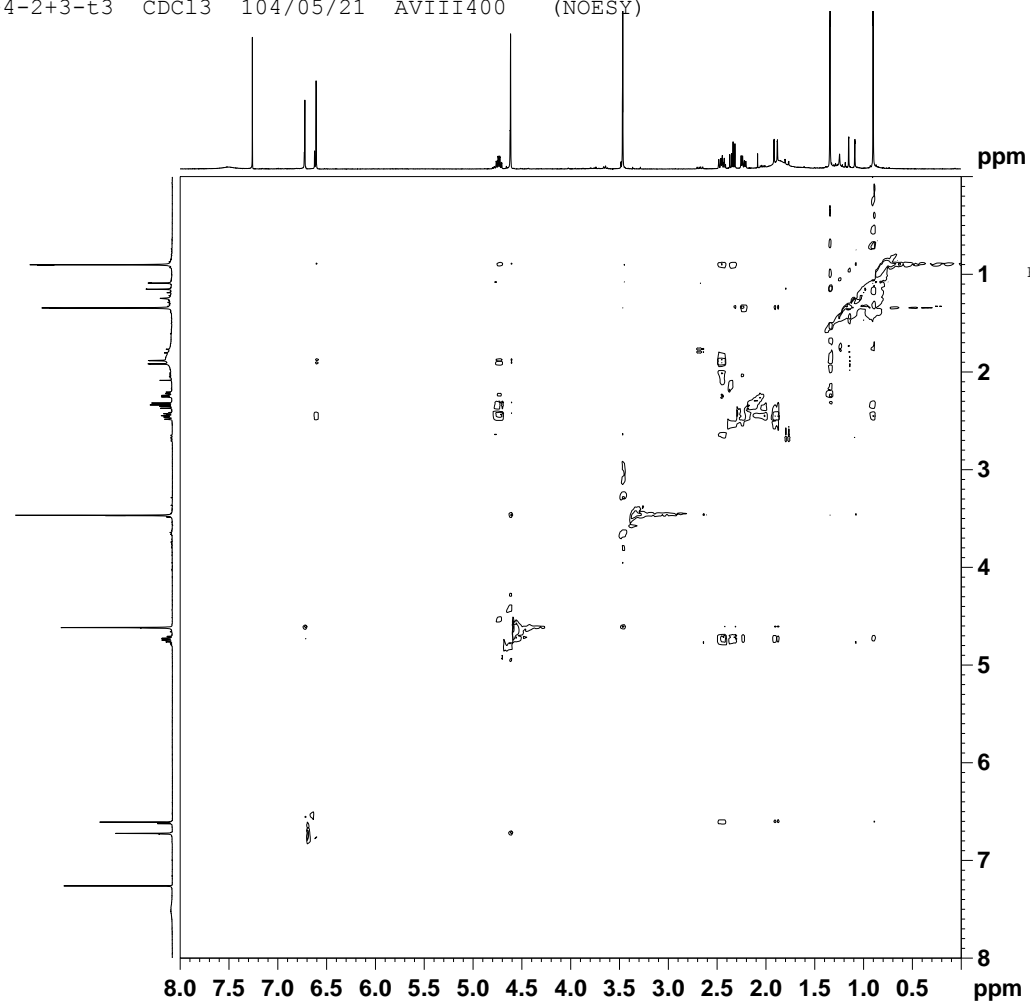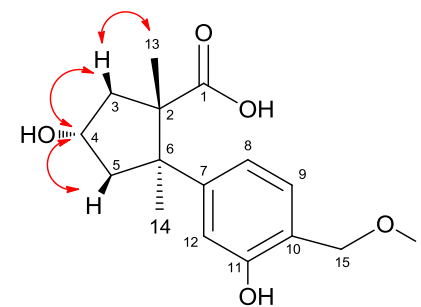

FP-4-2+3-t3 CDC13 104/05/21 AVIII400 (NOESY)

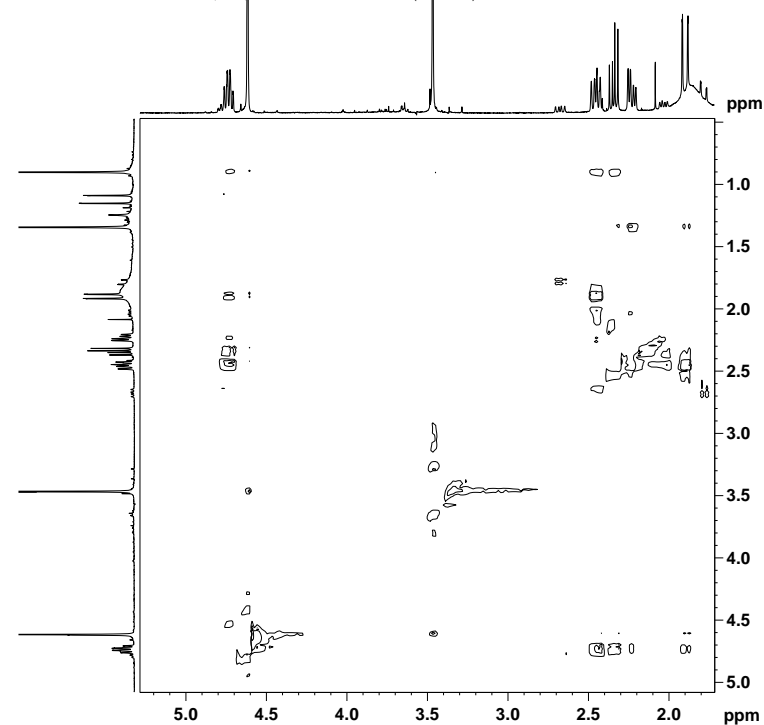

**S 25 HSQC spectrum and key of HSQC spectrum of fomitopin-D (4).**

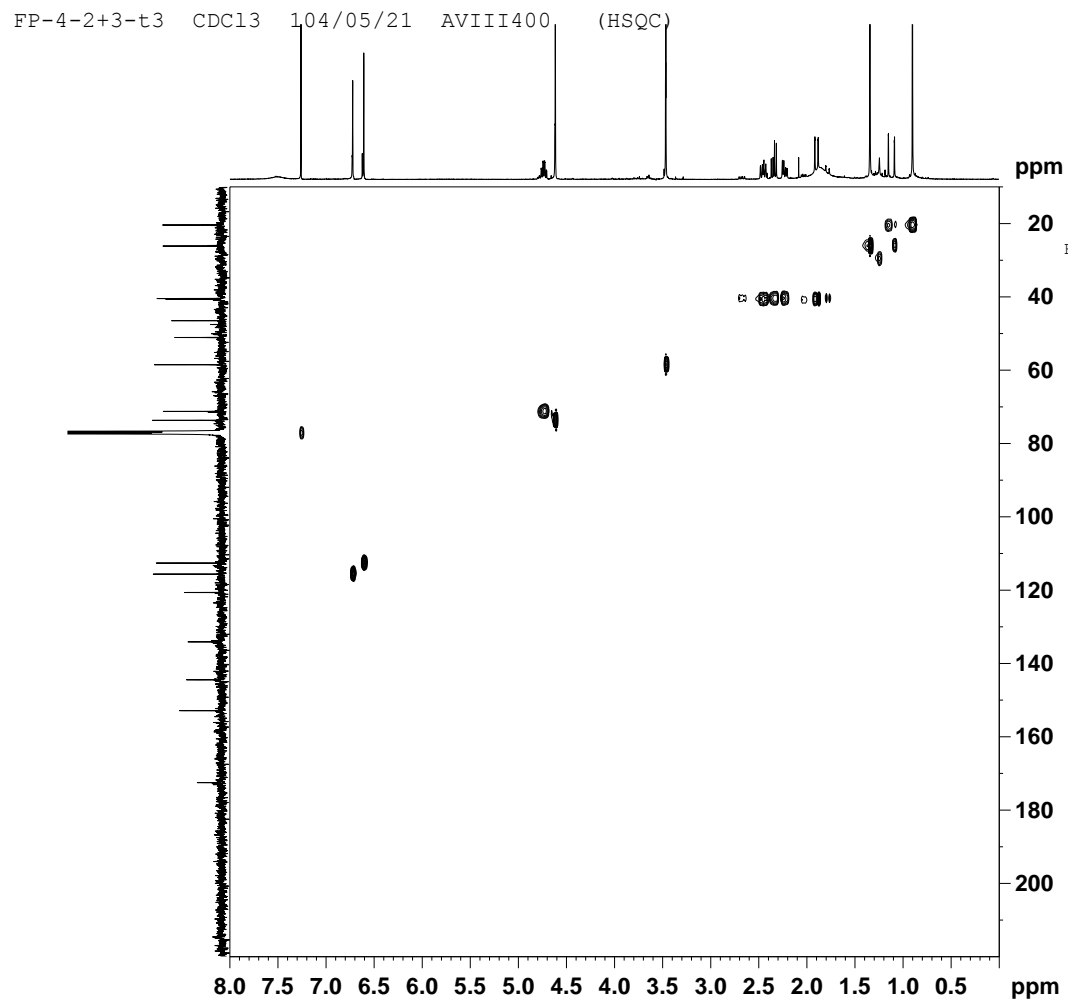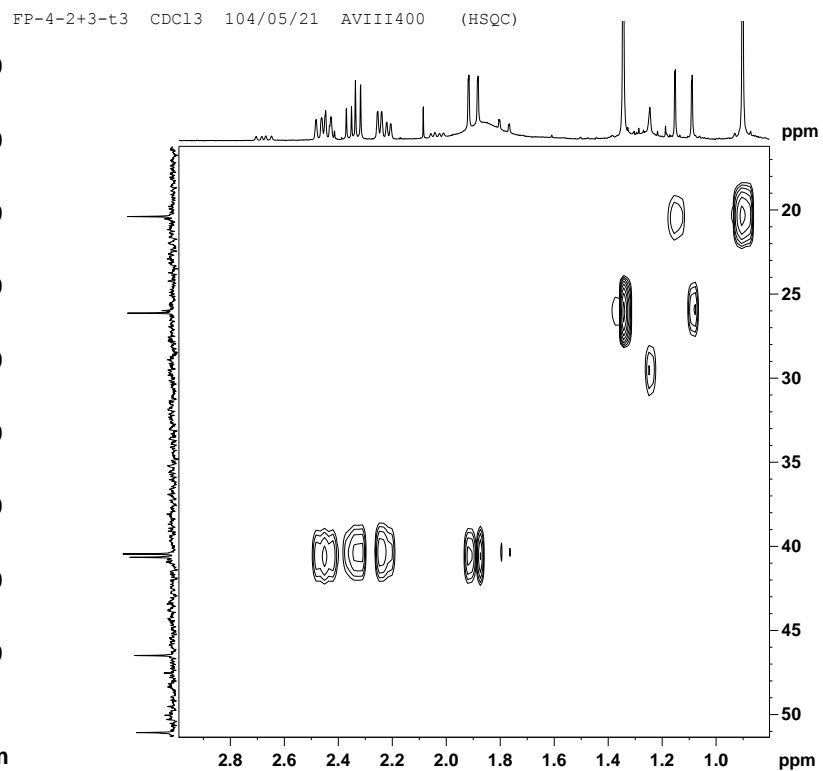

### S 26 HMBC spectrum of fomitopin-D (4).

FP-4-2+3-t3 CDC13 104/05/21 AVIII400 (HMBC)

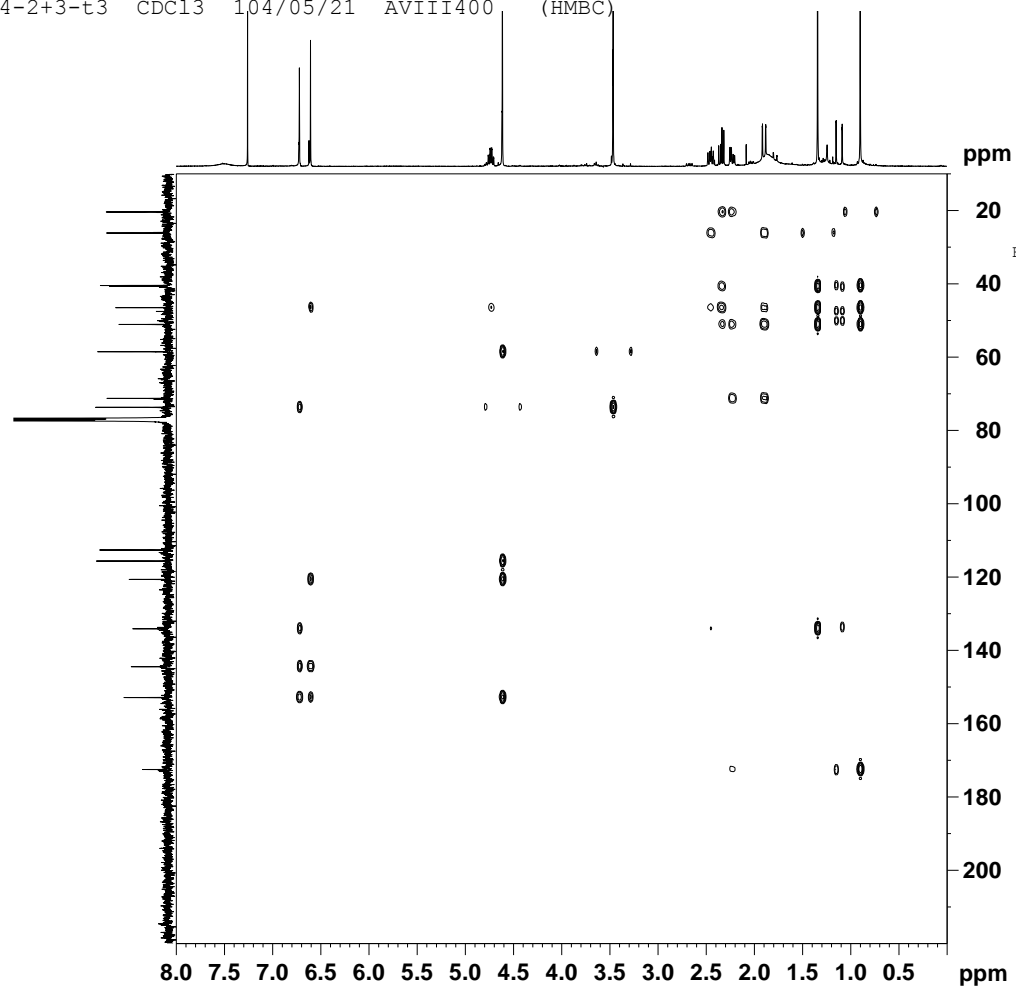

FP-4-2+3-t3 CDC13 104/05/21 AVIII400 (HMBC)

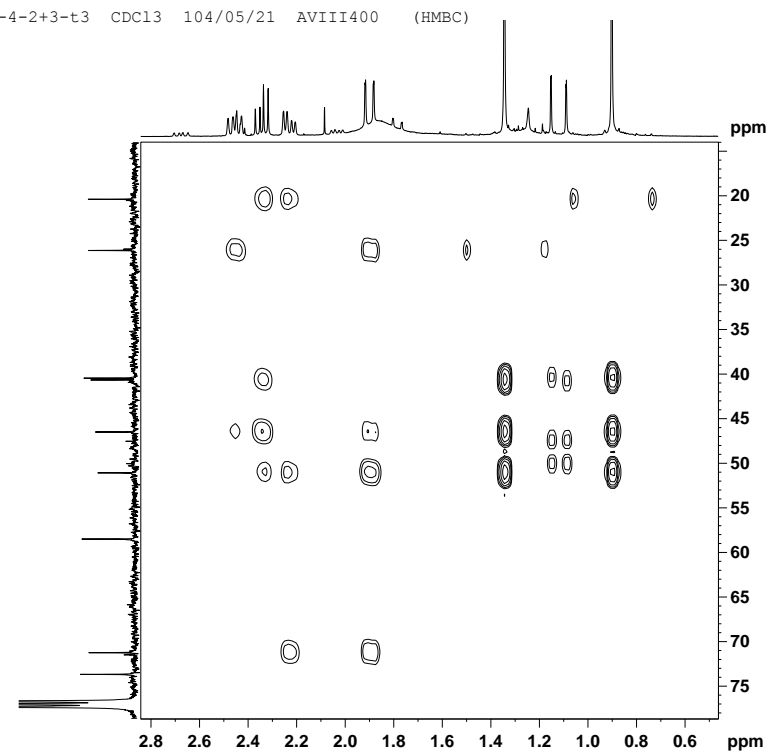



S 27 ECD spectrum of fomitopin-D (4).

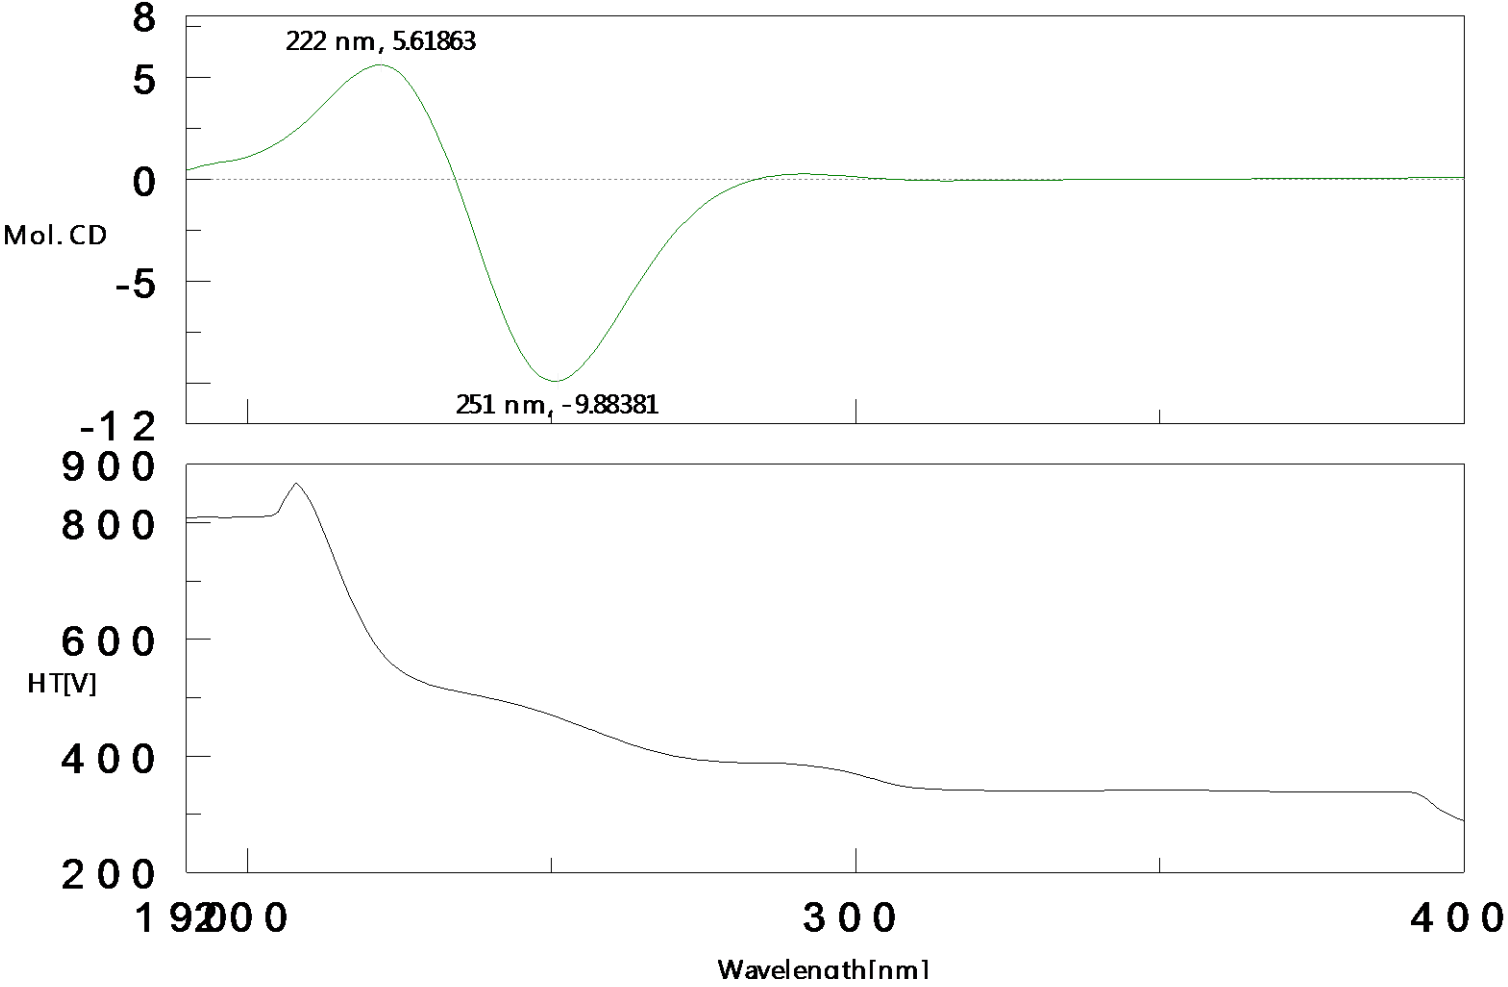

S 28 <sup>1</sup>H NMR (400 MHz, CDCl<sub>3</sub>) spectrum of fomitopin-E (5).

FP-4-4+5-3-h1 CDCl<sub>3</sub> 104/05/26 AVIII400 (H1)

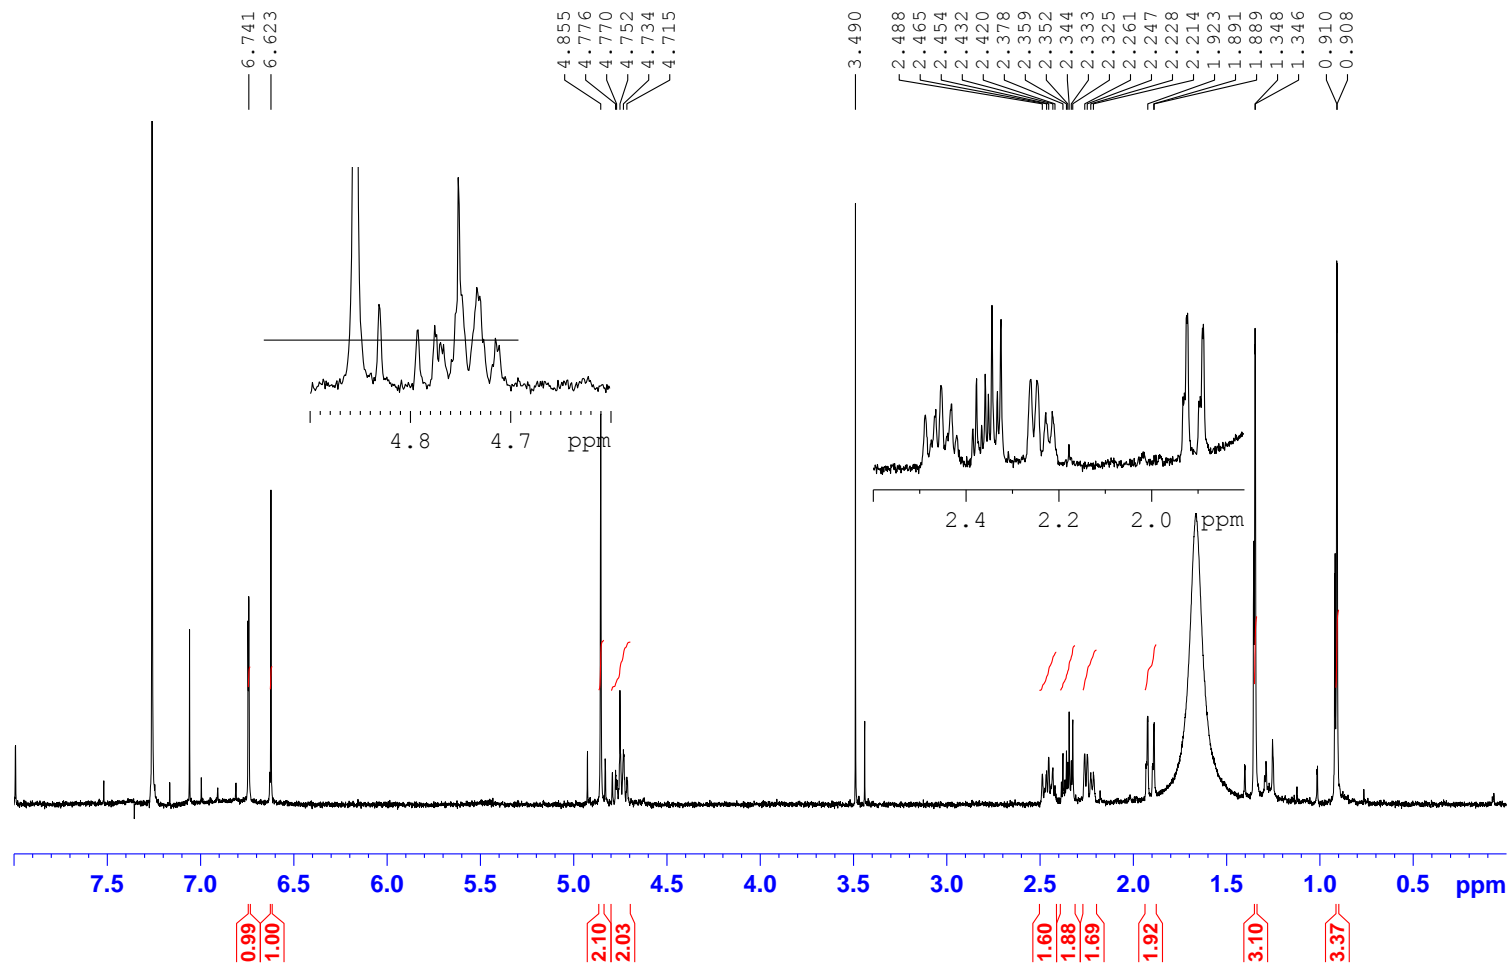

S 29 <sup>13</sup>C NMR (100 MHz, CDCl<sub>3</sub>) spectrum of fomitopin-E (5).

FP-4-4+5-3-h1 CDC13 104/05/26 AVIII400 (C13)

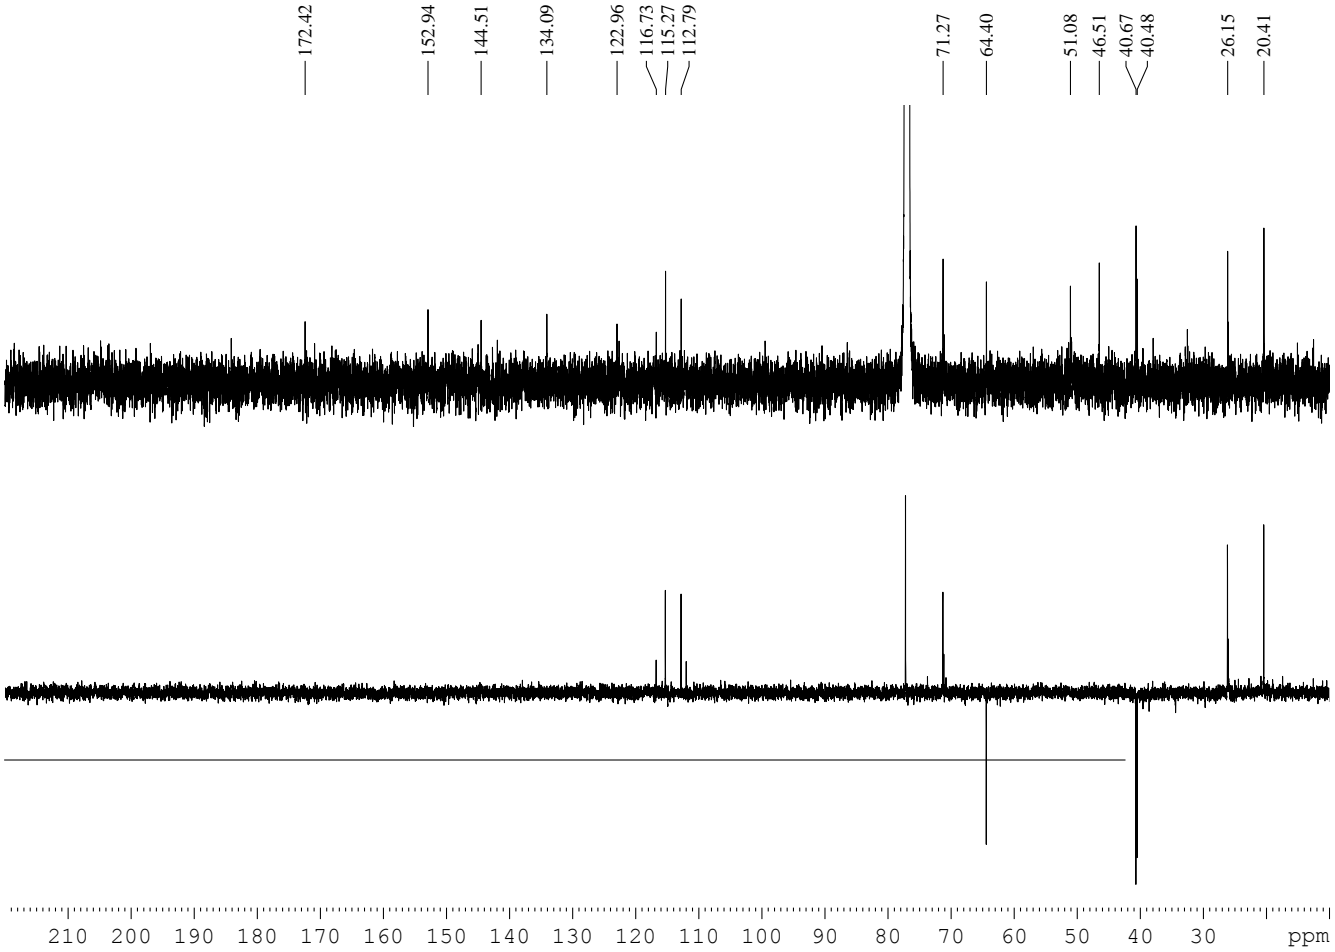

S 30 COSY spectrum of fomitopin-E (5).

FP-4-4+5-3-h1 CDC13 104/05/26 AVIII400 (COSY90)

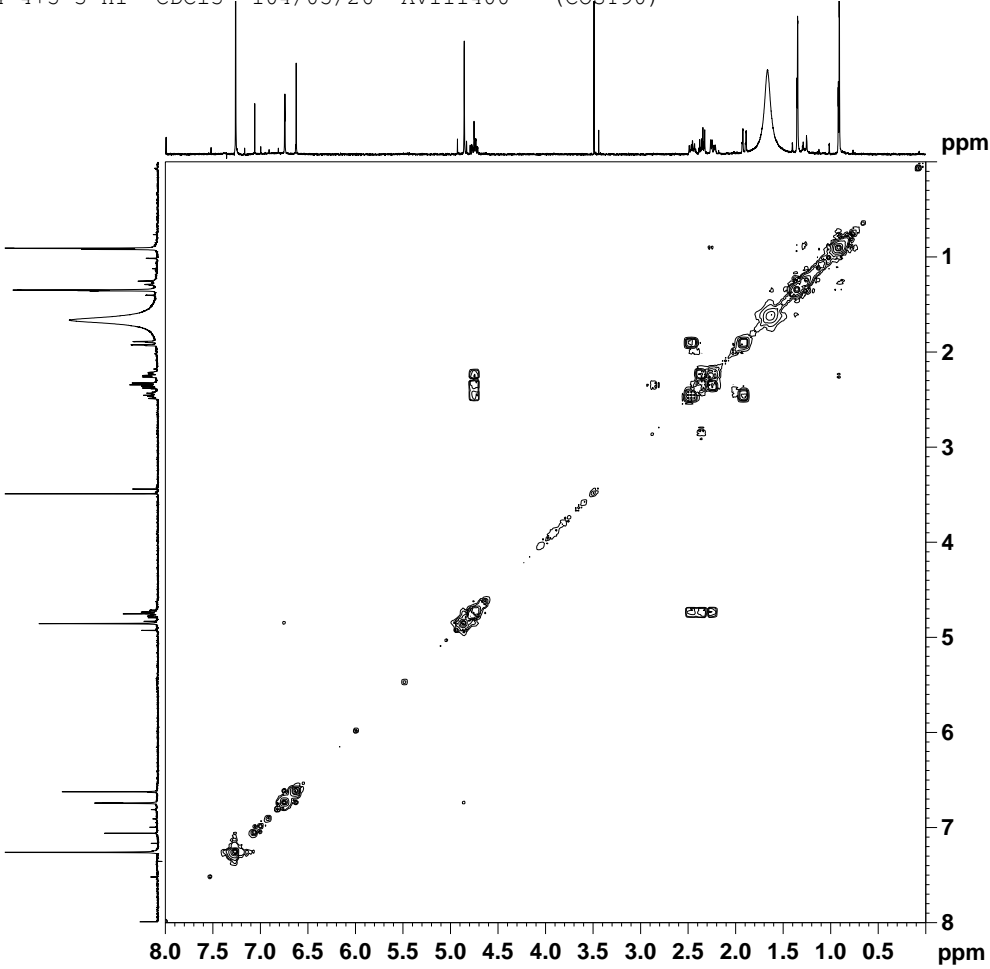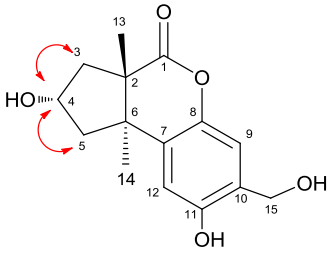

### S 31 NOESY spectrum and key of NOESY spectrum of fomitopin-E (5).

FP-4-4+5-3-h1 CDCl3 104/05/26 AVIII400 (NOESY)

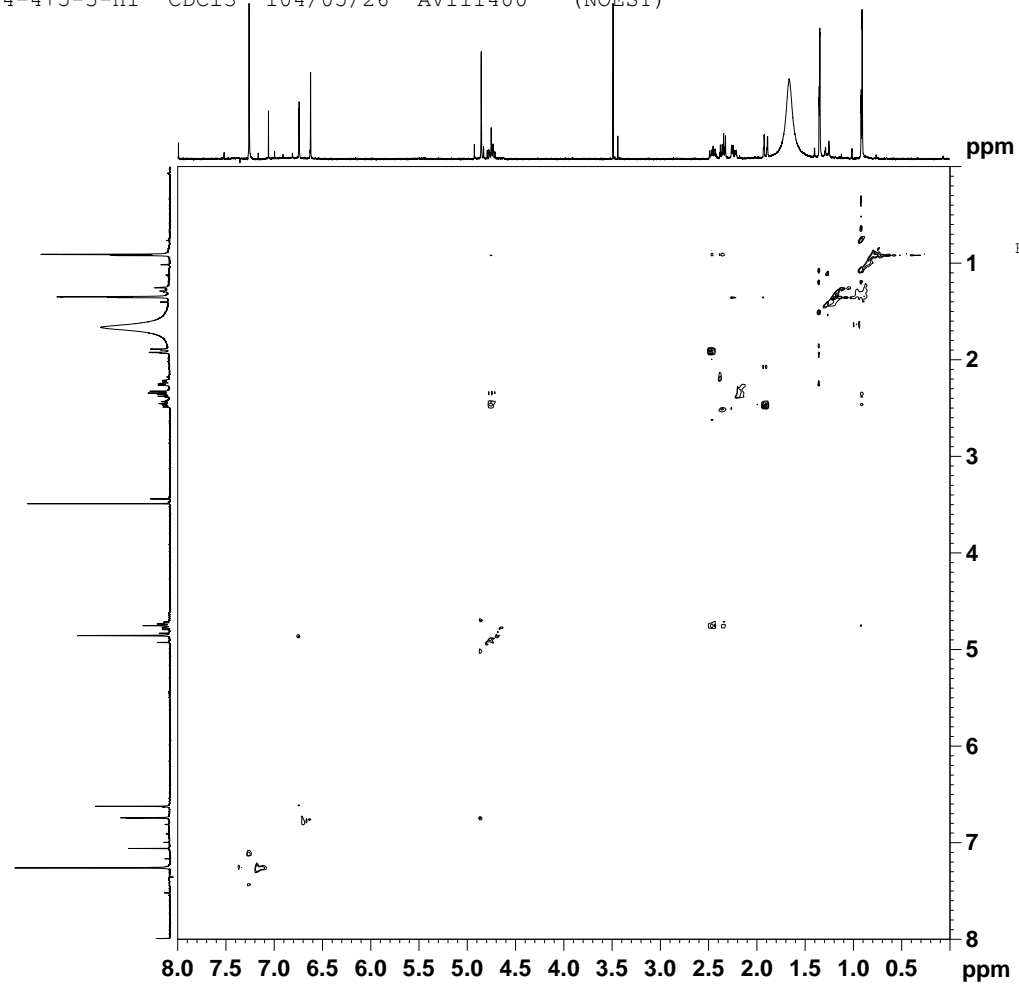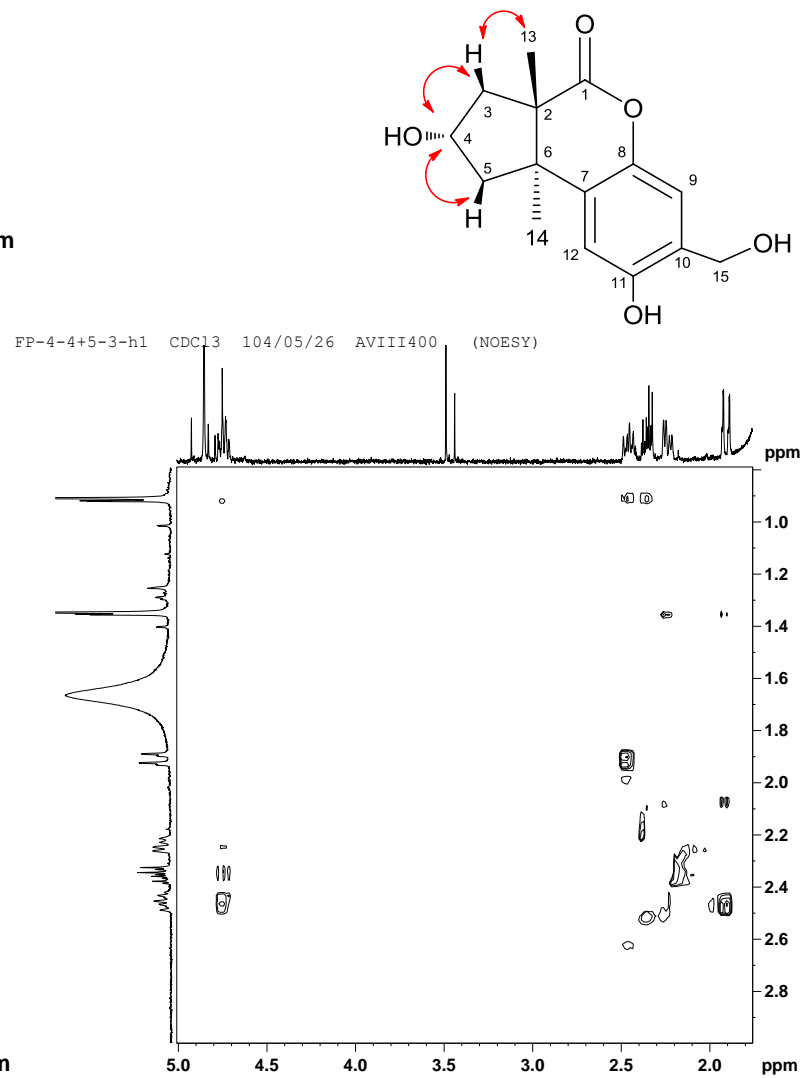

**S 32 HSQC spectrum and key of HSQC spectrum of fomitopin-E (5).**

FP-4-4+5-3-h1 CDCl3 104/05/26 AVIII400 (HSQC)

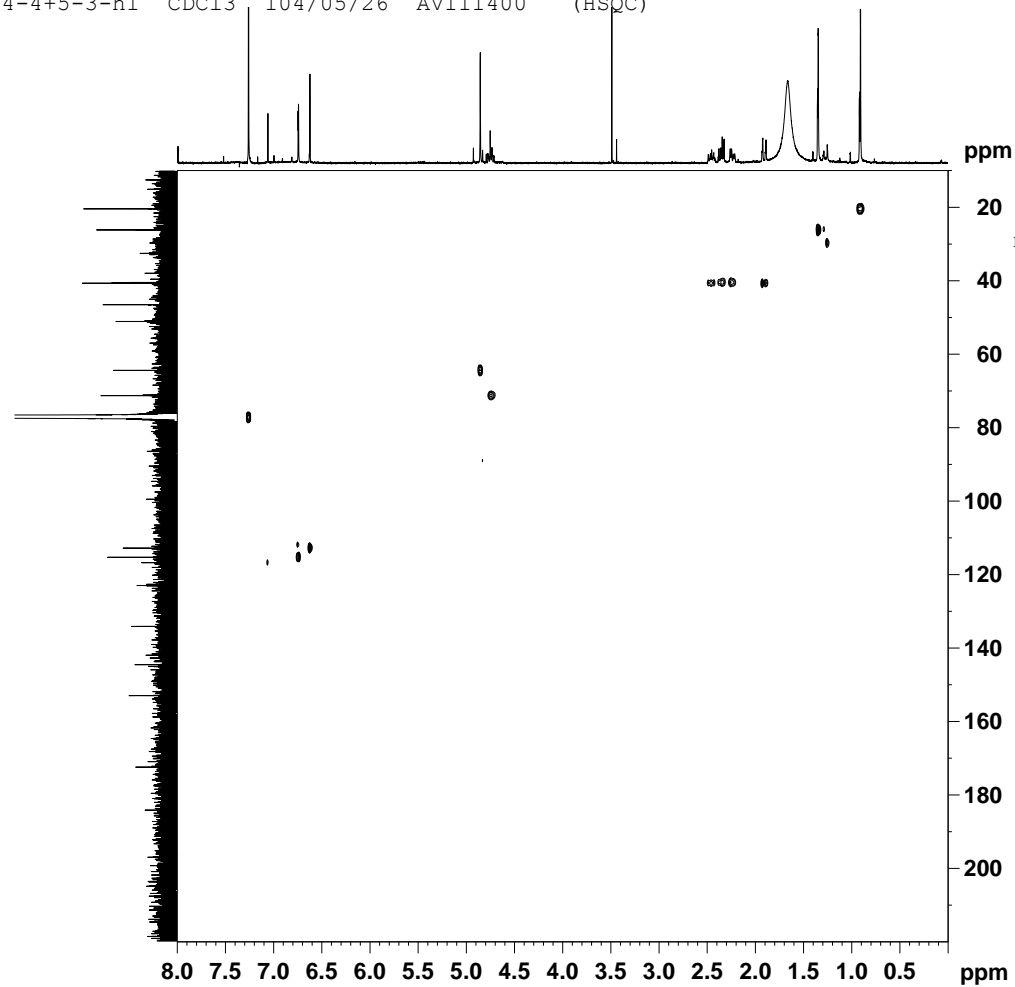

FP-4-4+5-3-h1 CDCl3 104/05/26 AVIII400 (HSQC)

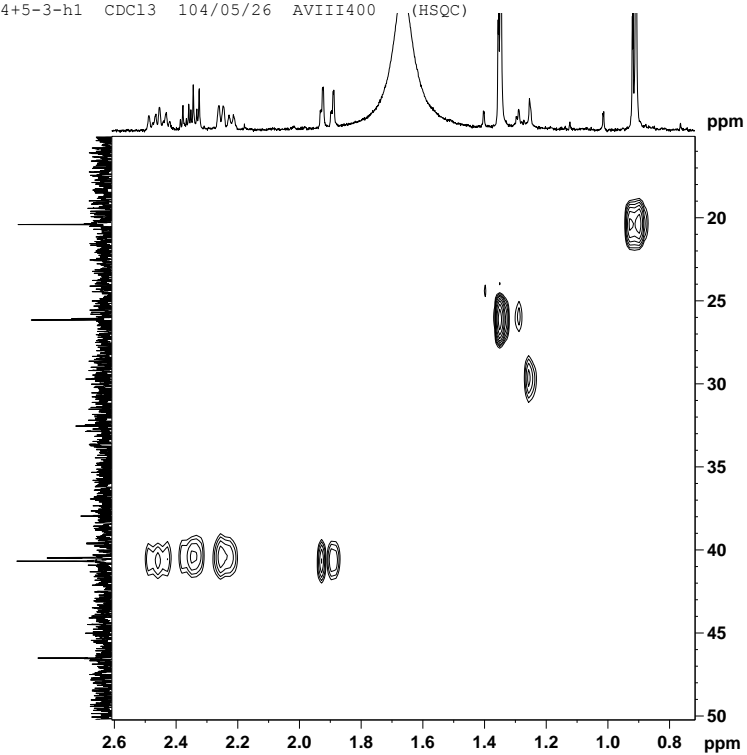

# S 33 HMBC spectrum of fomitopin-E (5).

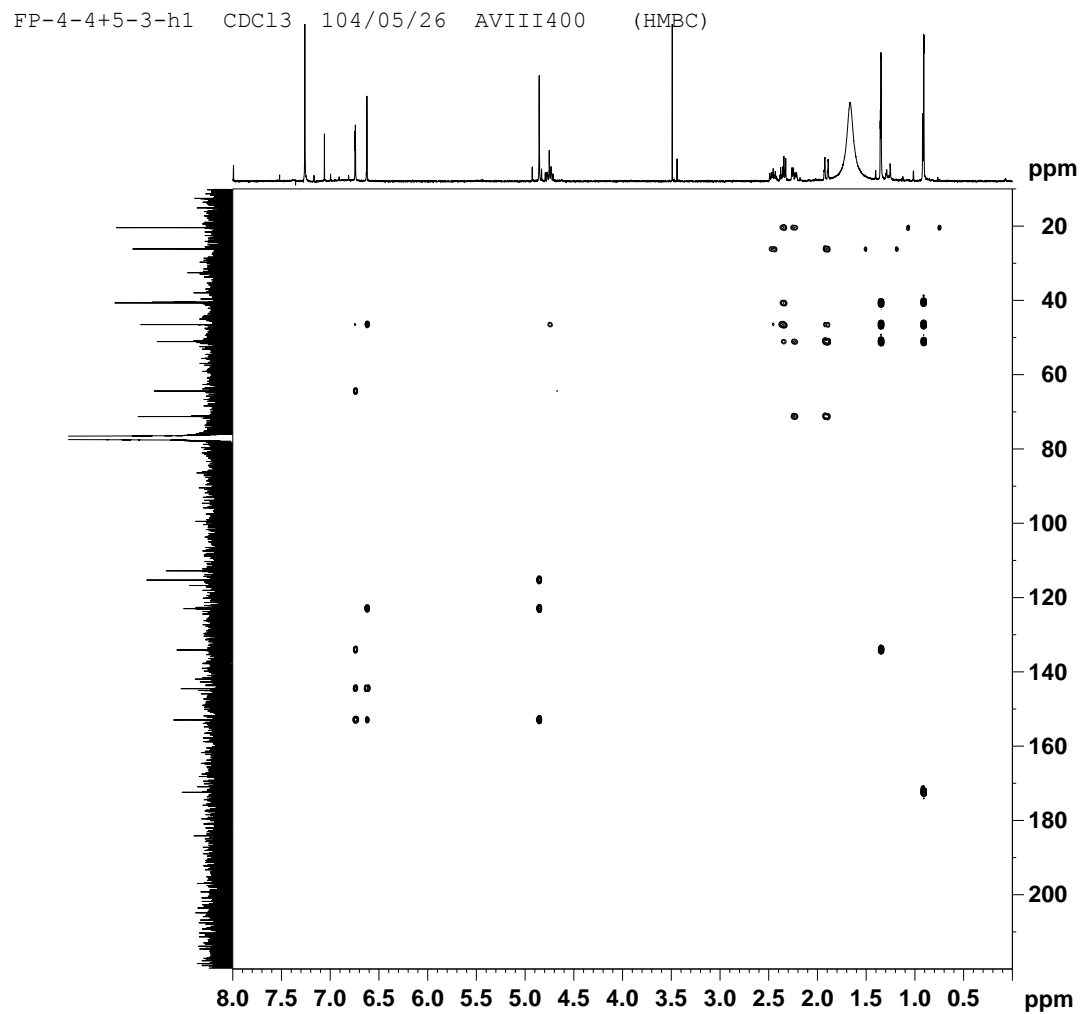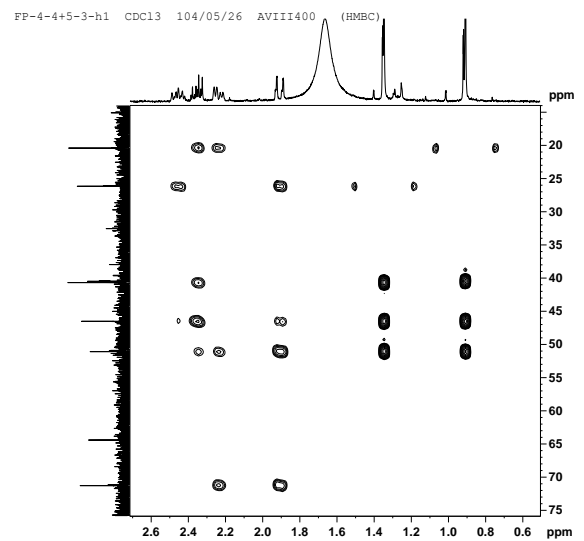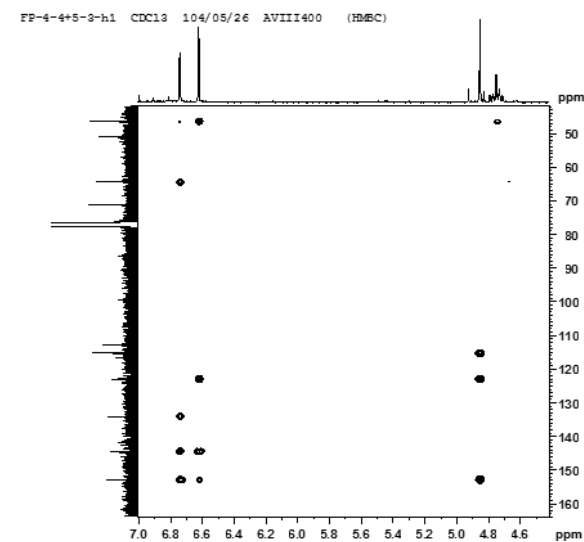

S 34 ECD spectrum of fomitopin-E (5).

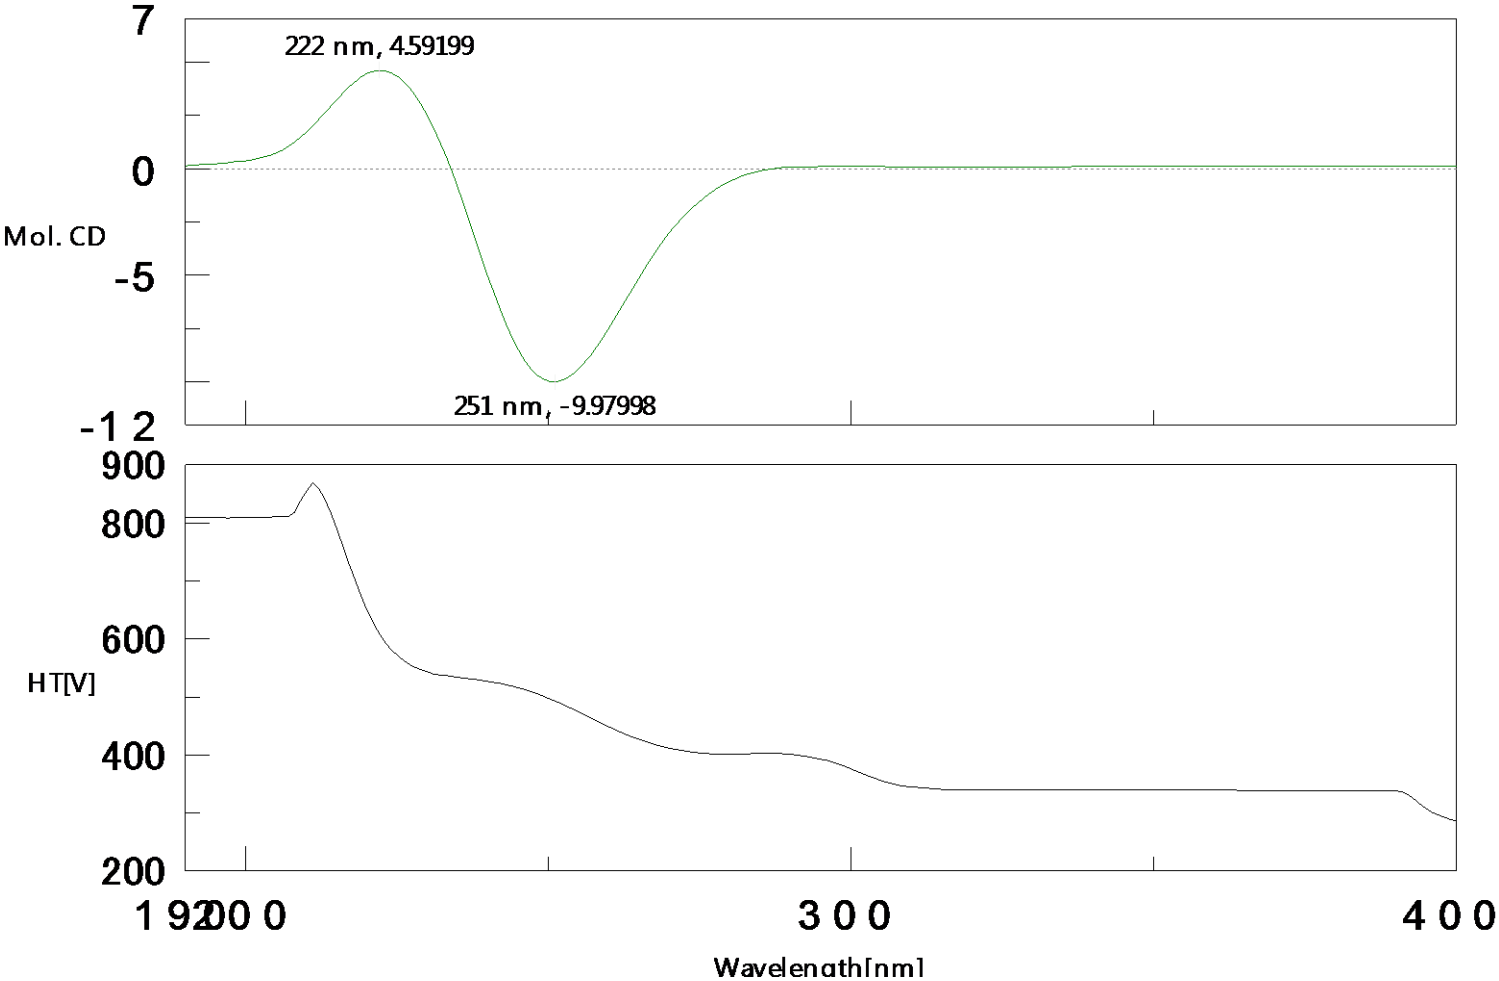



S 35 <sup>1</sup>H NMR (400 MHz, CDCl<sub>3</sub>) spectrum of fomitopin-F (6).

FP-4-4+5-3-h2 CDCl<sub>3</sub> 2015/06/03 AV500

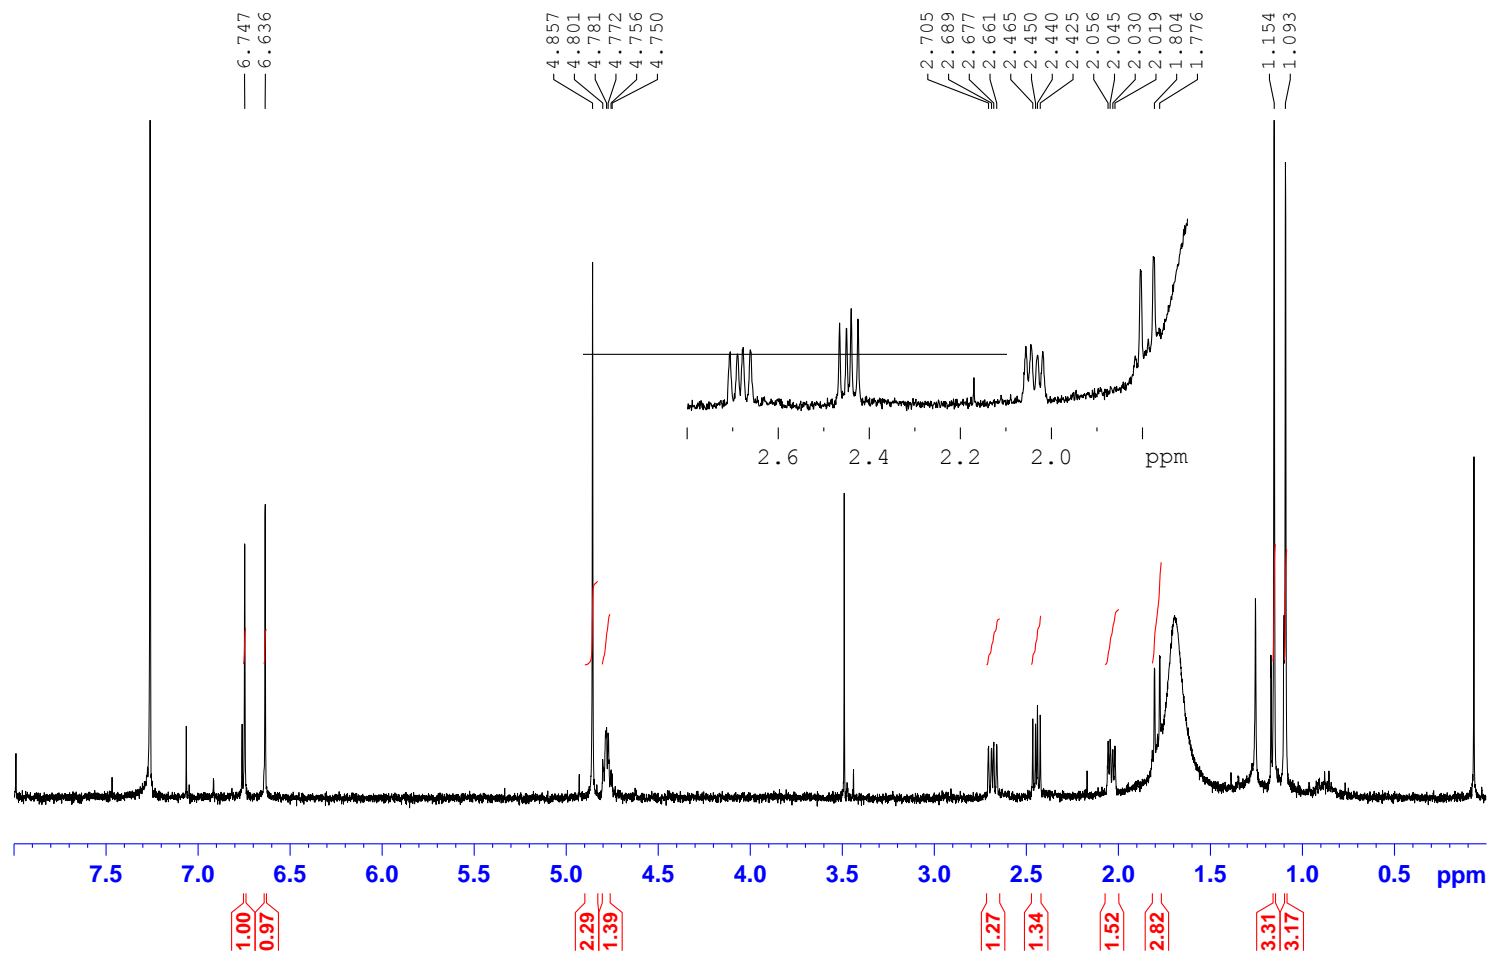

S 36 <sup>13</sup>C NMR (100 MHz, CDCl<sub>3</sub>) spectrum of fomitopin-F (6).

FP-4-4+5-3-h2 CDC13 2015/06/03 AV500 C13

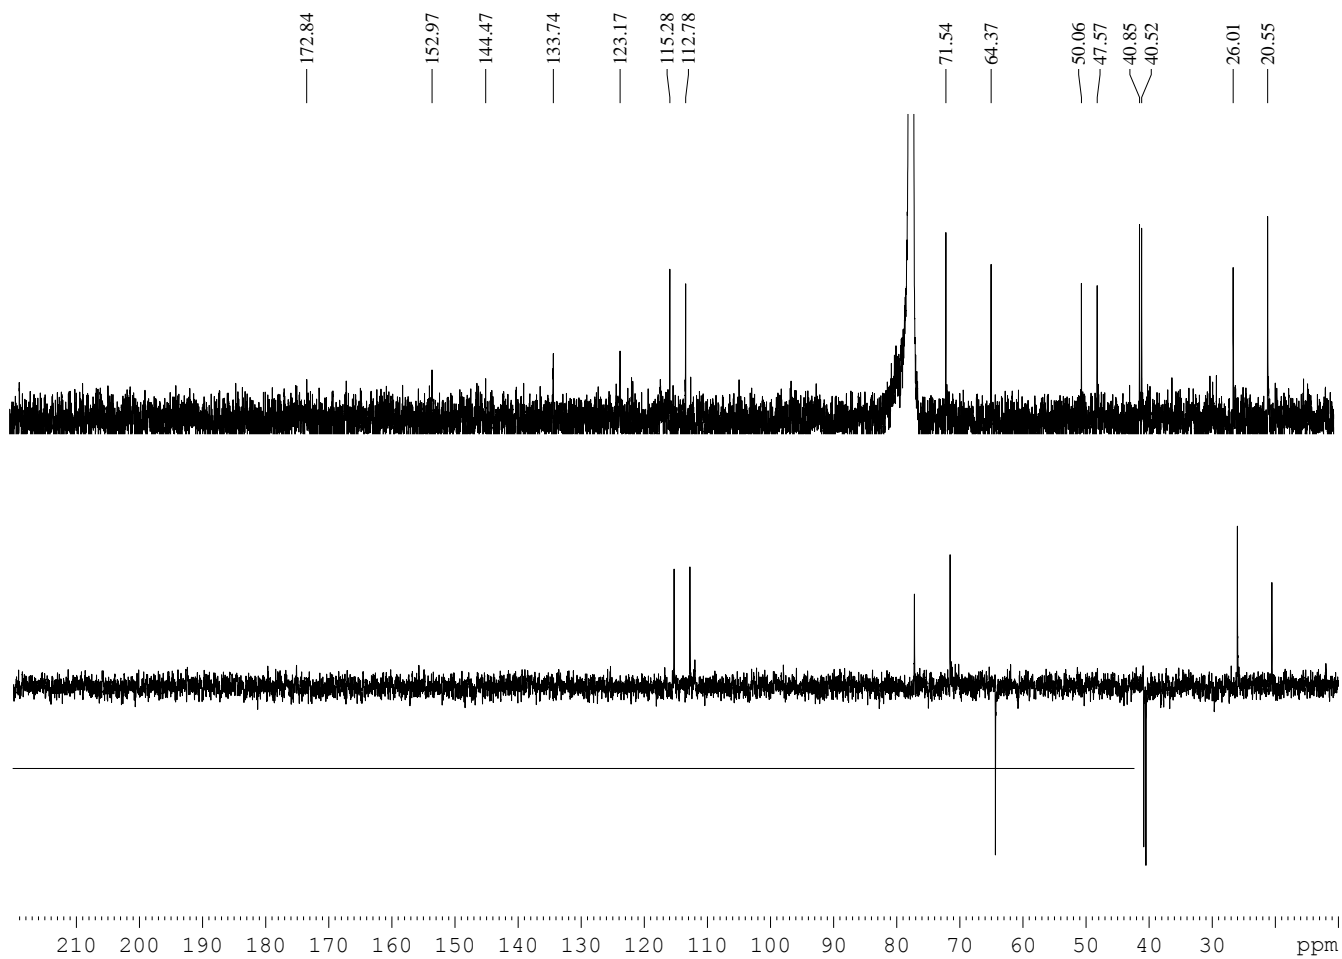

### S 37 COSY spectrum of fomitopin-F (6).

FP-4-4+5-3-h2 CDCl<sub>3</sub> 104/05/30 AVIII400 (COSY90)

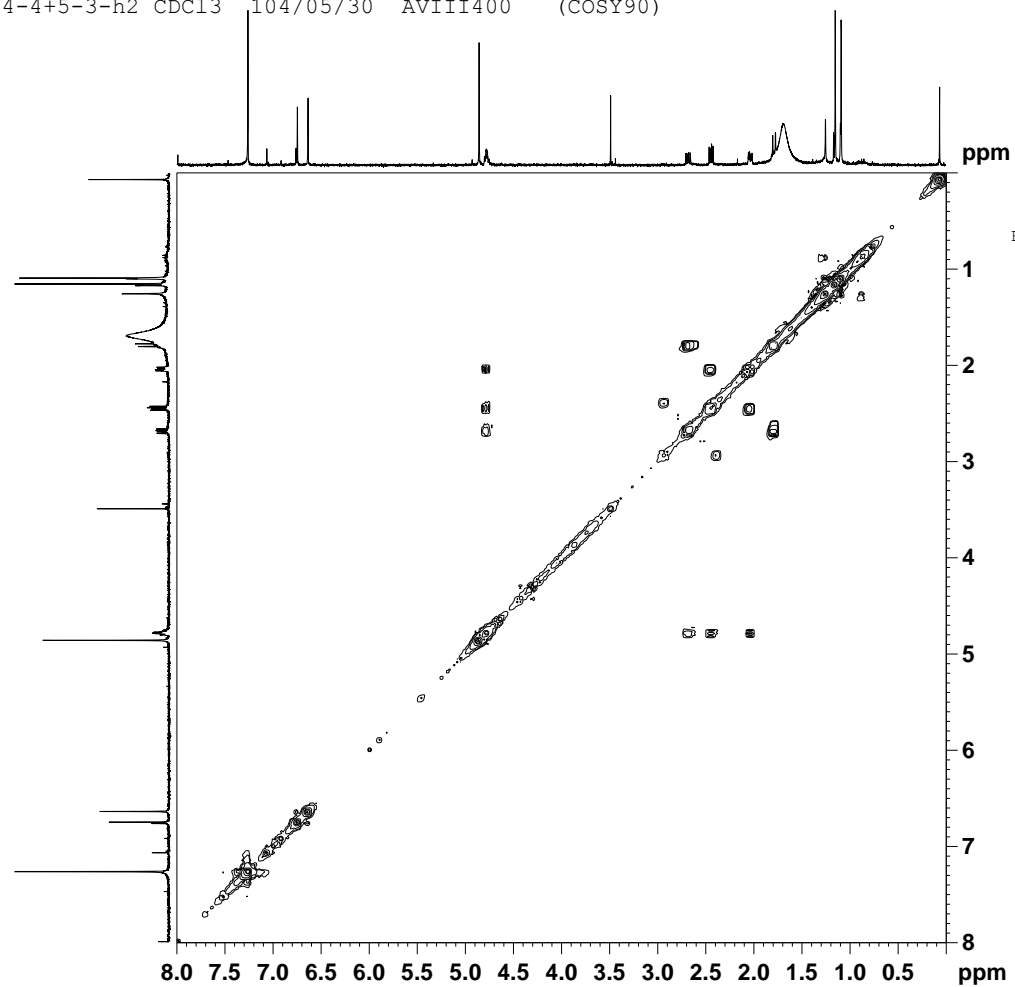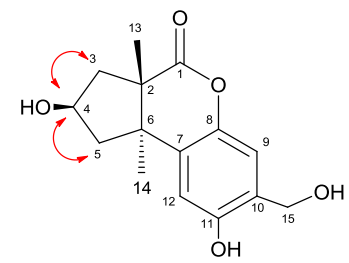

FP-4-4+5-3-h2 CDCl<sub>3</sub> 104/05/30 AVIII400 (COSY90)

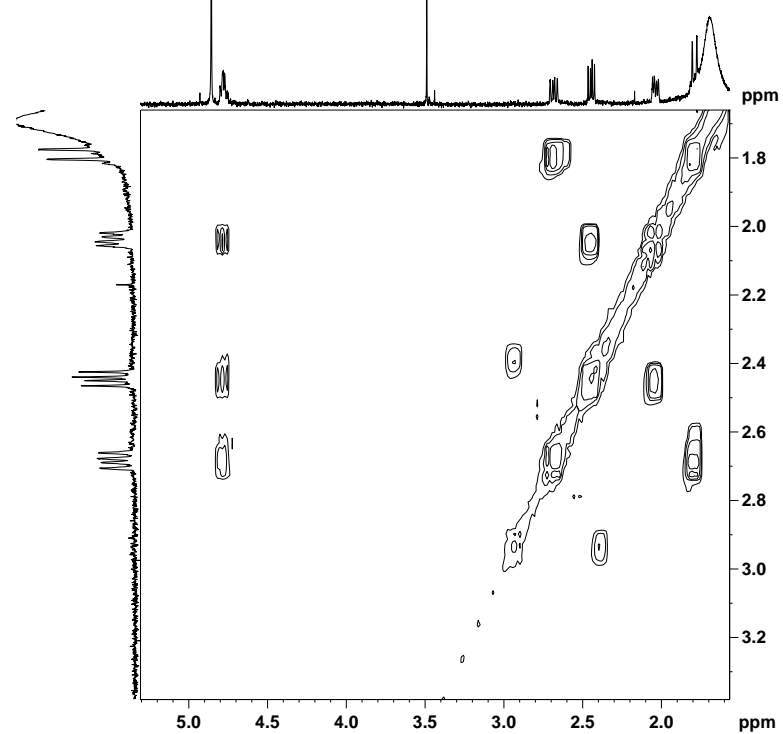

### S 38 NOESY spectrum of fomitopin-F (6).

FP-4-4+5-3-h2 CDC13 104/05/30 AVIII400 (NOESY)

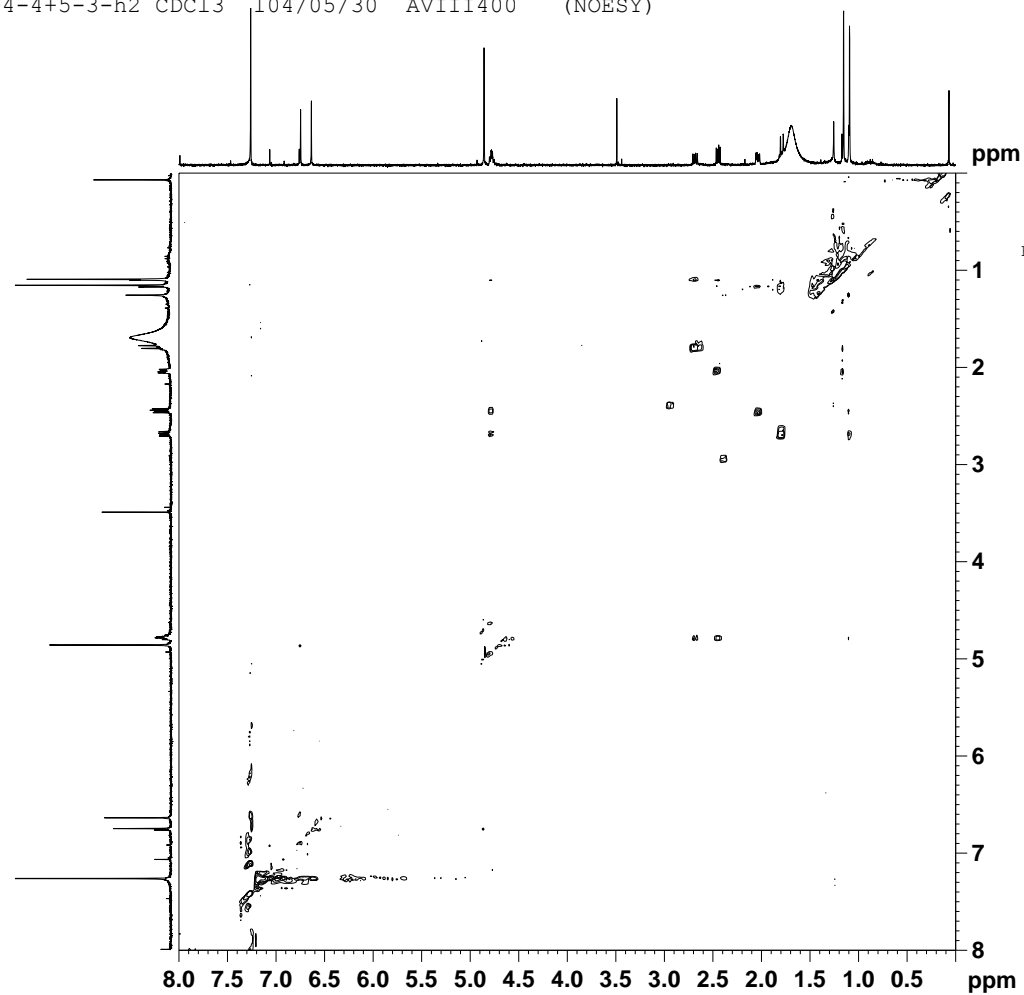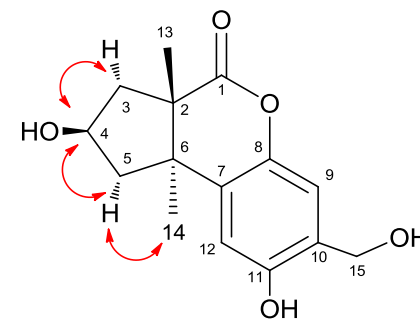

FP-4-4+5-3-h2 CDC13 104/05/30 AVIII400 (NOESY)

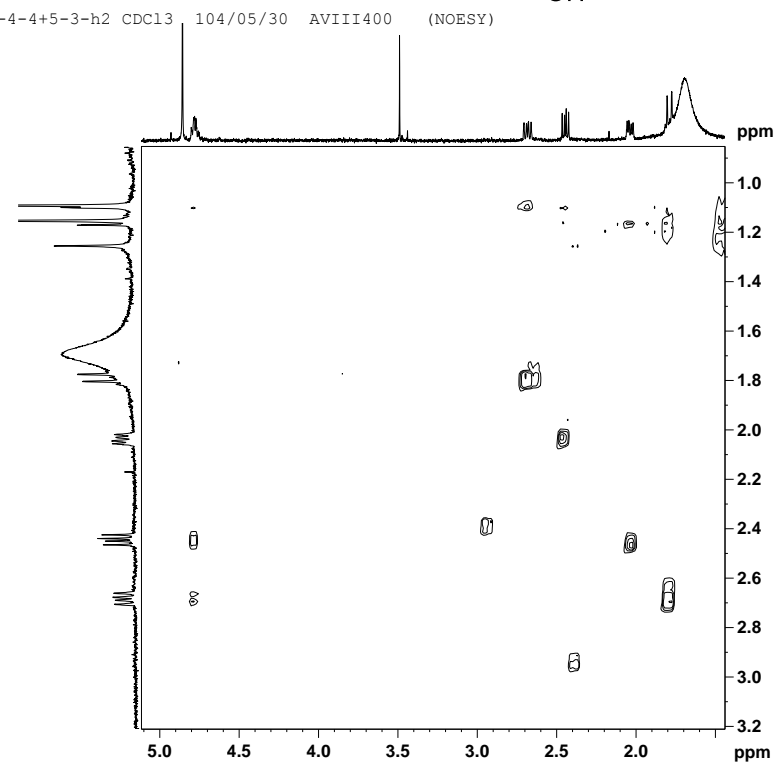

**S 39 HSQC spectrum and key of HSQC spectrum of fomitopin-F (6).**

FP-4-4+5-3-h2 CDCl3 104/05/30 AVIII400 (HSQC)

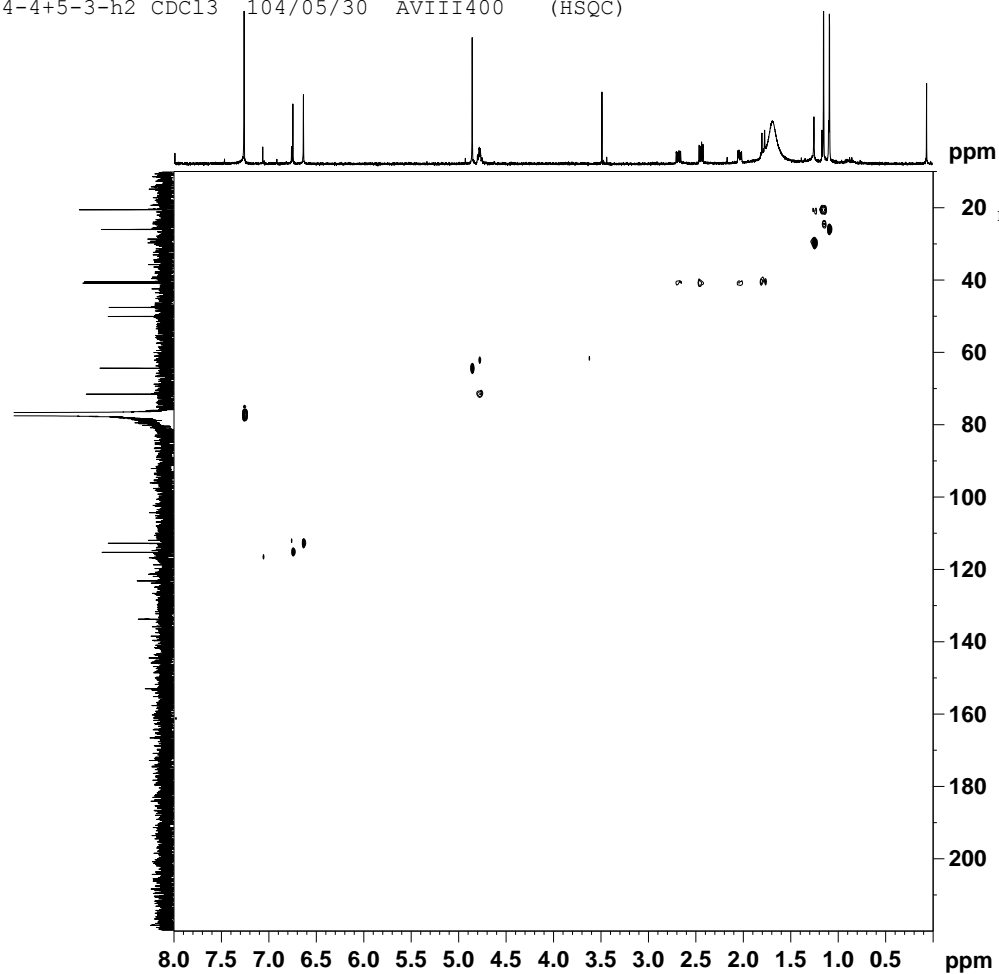

FP-4-4+5-3-h2 CDCl3 104/05/30 AVIII400 (HSQC)

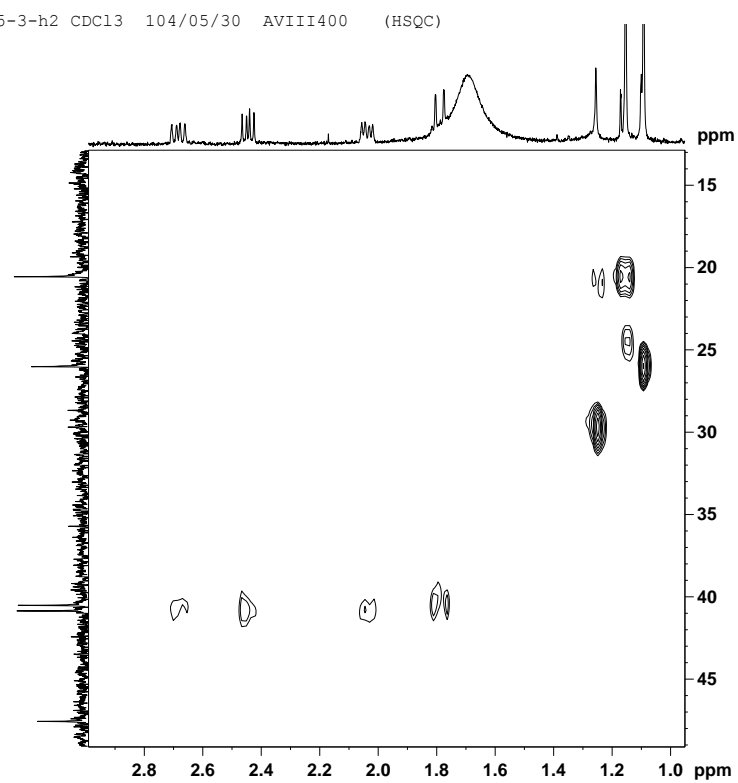

S 40 HMBC spectrum of fomitopin-F (6).

FP-4-4+5-3-h2 CDCl3 104/05/30 AVIII400 (HMBC)

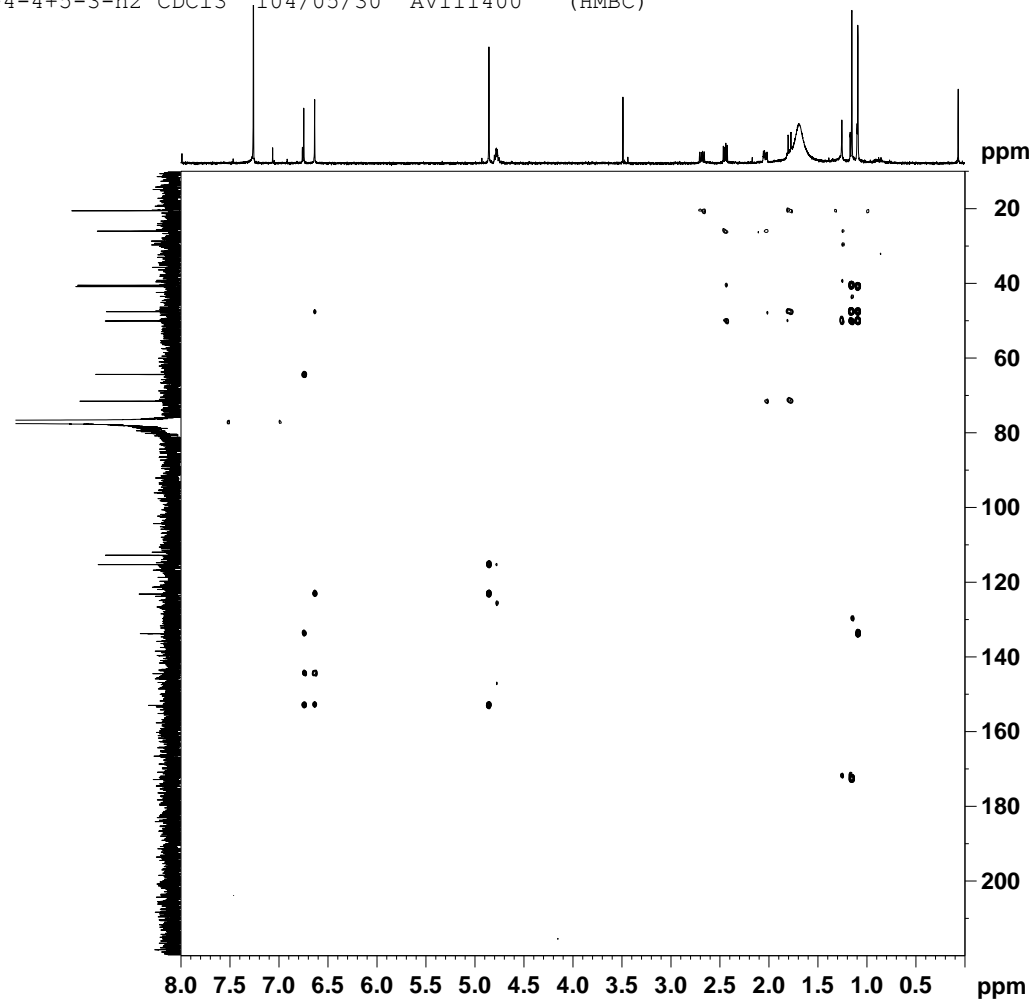

FP-4-4+5-3-h2 CDCl3 104/05/30 AVIII400 (HMBC)

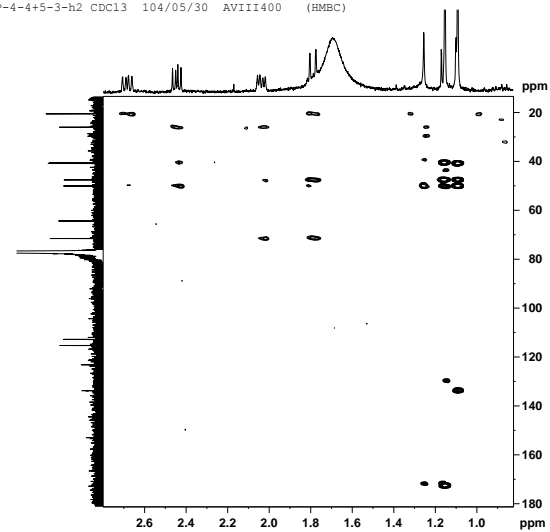

FP-4-4+5-3-h2 CDCl3 104/05/30 AVIII400 (HMBC)

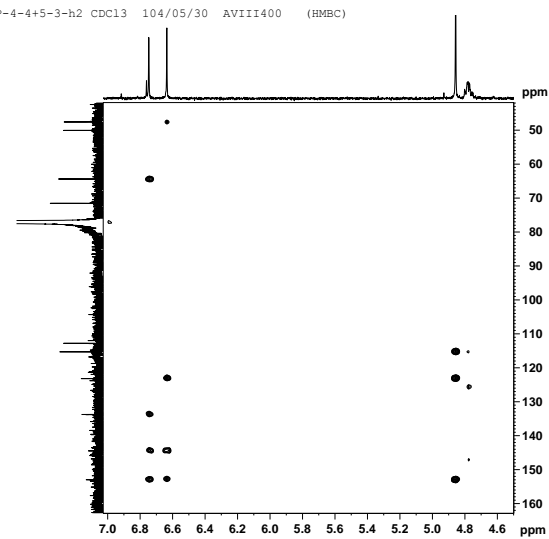

S 41 ECD spectrum of fomitopin-F (6).

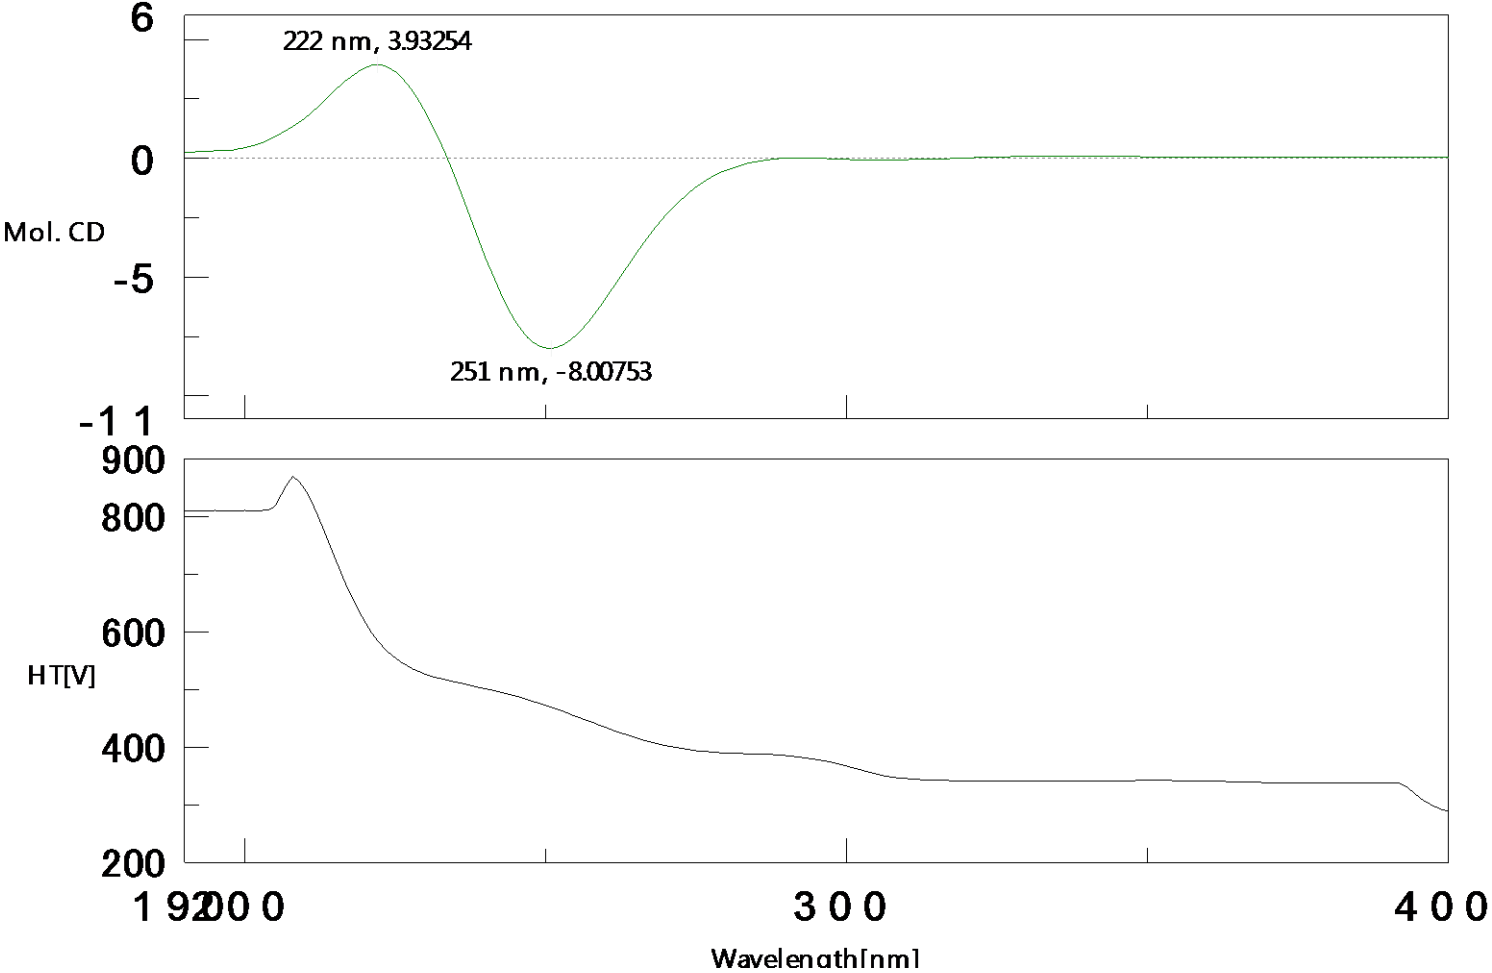

S 42 <sup>1</sup>H NMR (400 MHz, CDCl<sub>3</sub>) spectrum of fomitopin-G (7).

FP-4-2+3-t4 CDCl<sub>3</sub> 104/05/21 AVIII400 (H1)

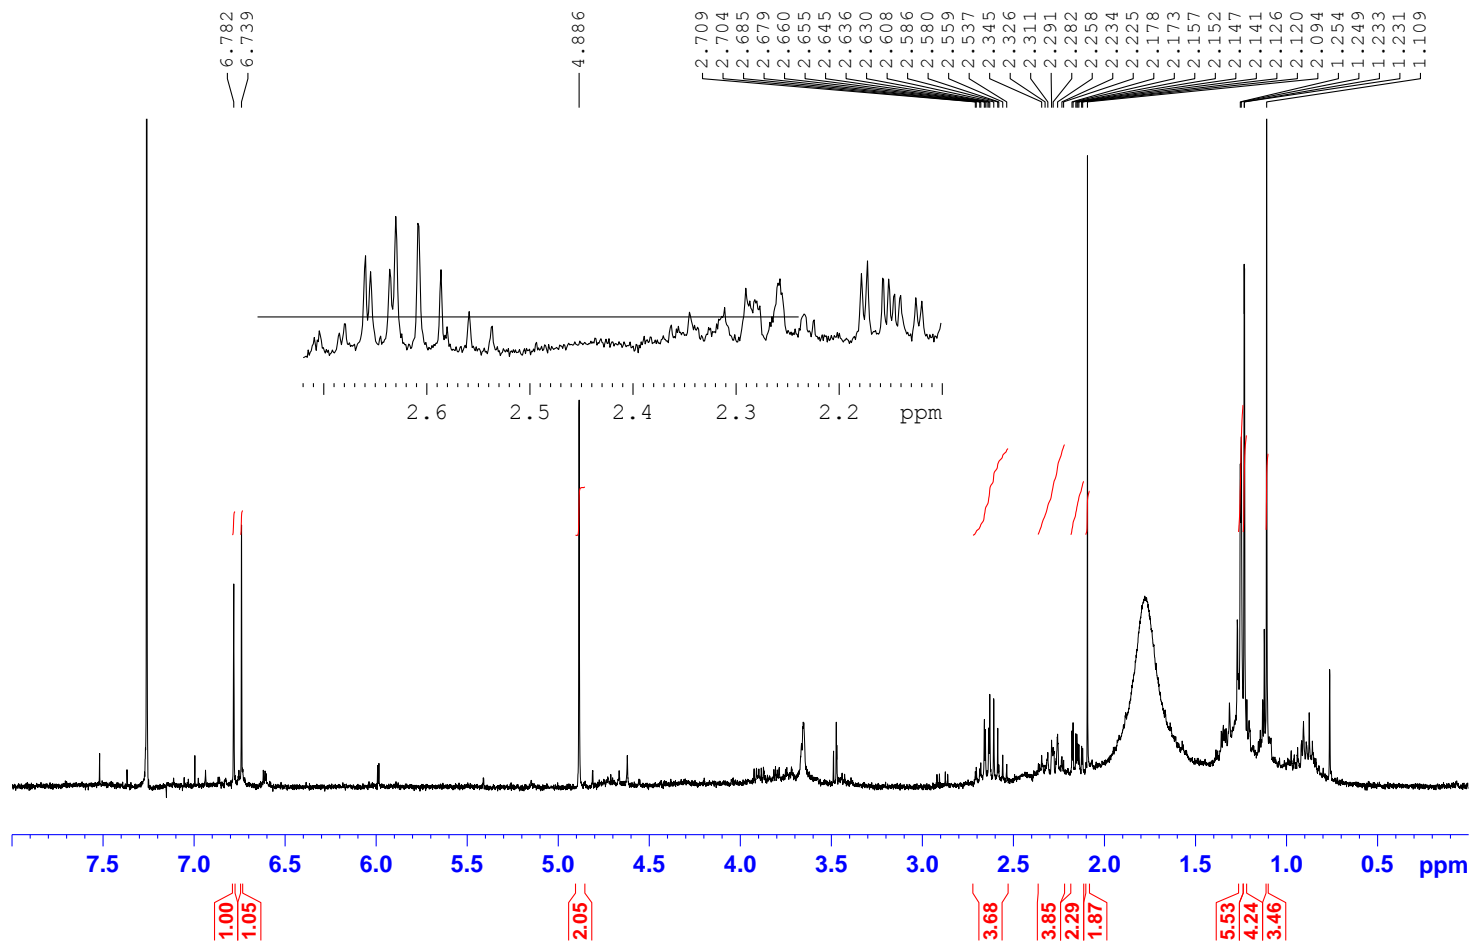



S 43 <sup>13</sup>C NMR (100 MHz, CDCl<sub>3</sub>) spectrum of fomitopin-G (7).

FP-4-2+3-t4 CDC13 104/05/21 AVIII400 (C13)

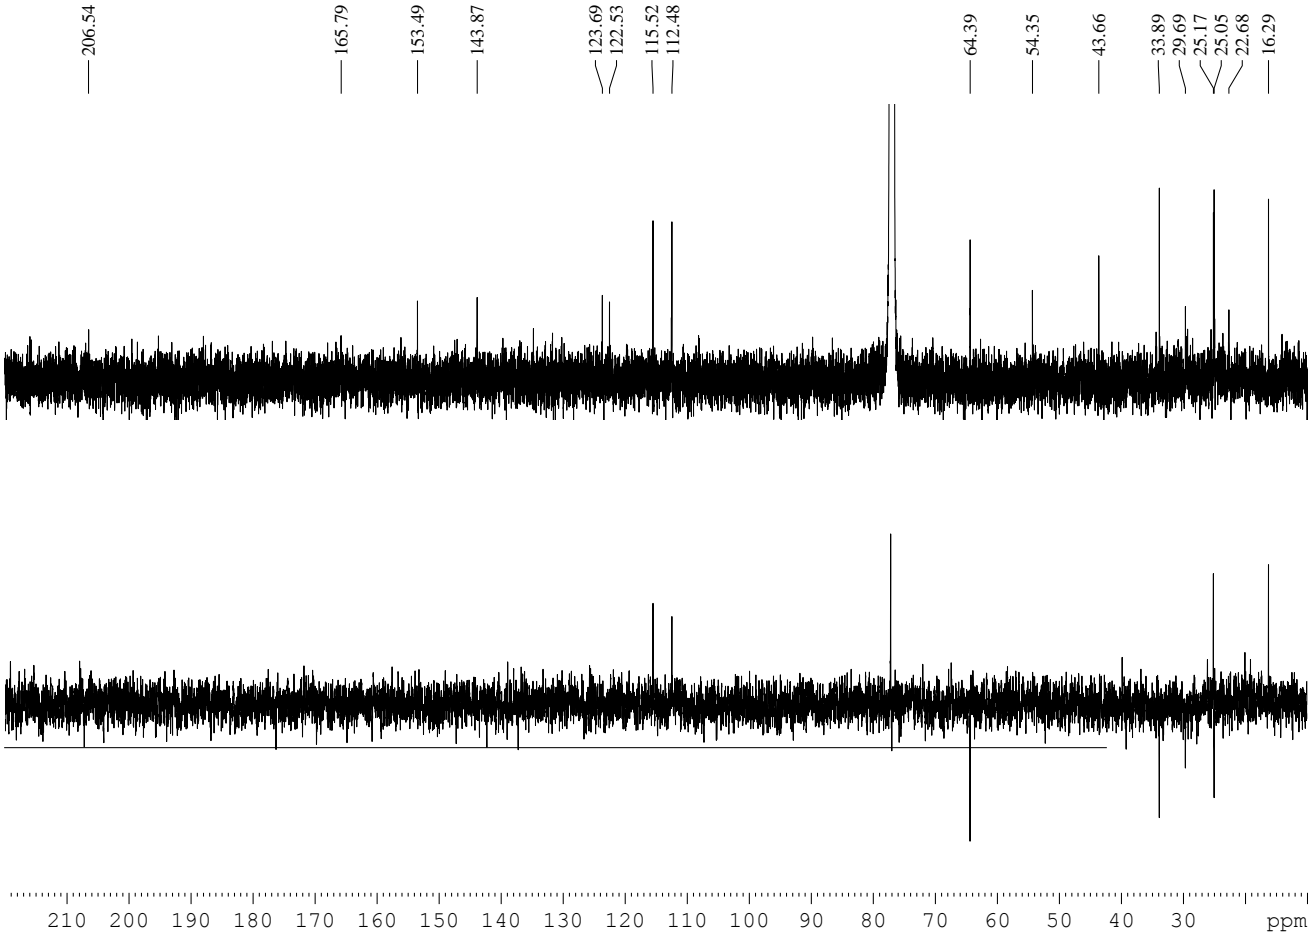

S 44 COSY spectrum of fomitopin-G (7).

FP-4-2+3-t4 CDC13 104/05/21 AVIII400 (COSY90)

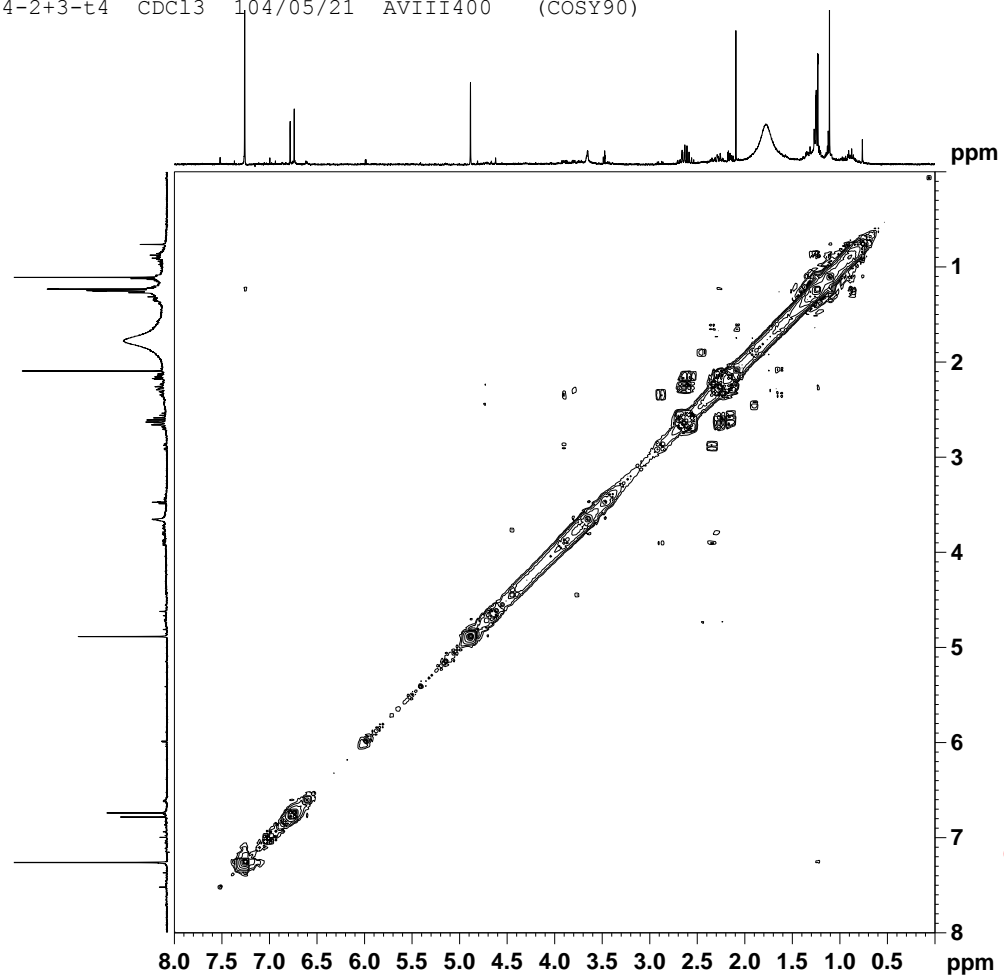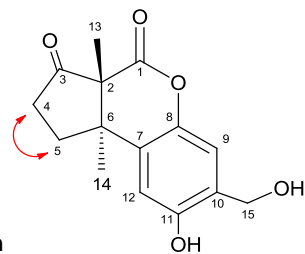

**S 45 HSQC spectrum and key of HSQC spectrum of fomitopin-G (7).**

FP-4-2+3-t4 CDCl3 104/05/21 AVIII400 (HSQC)

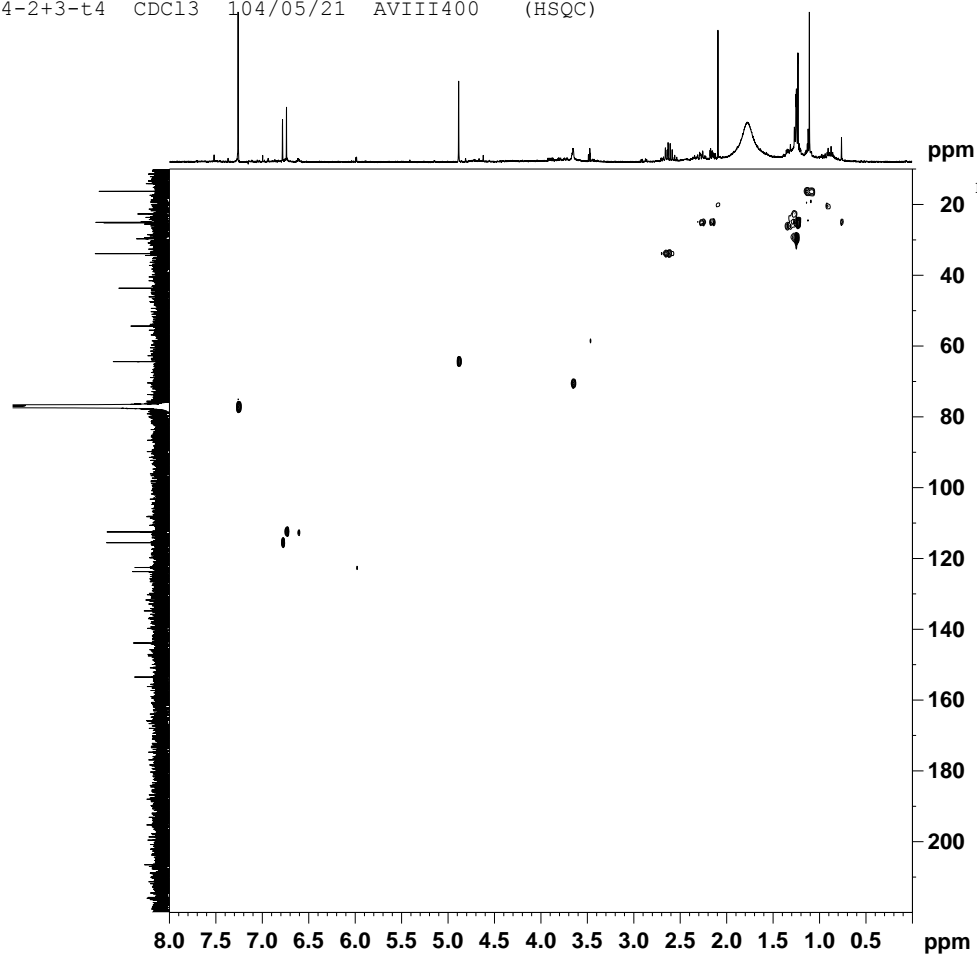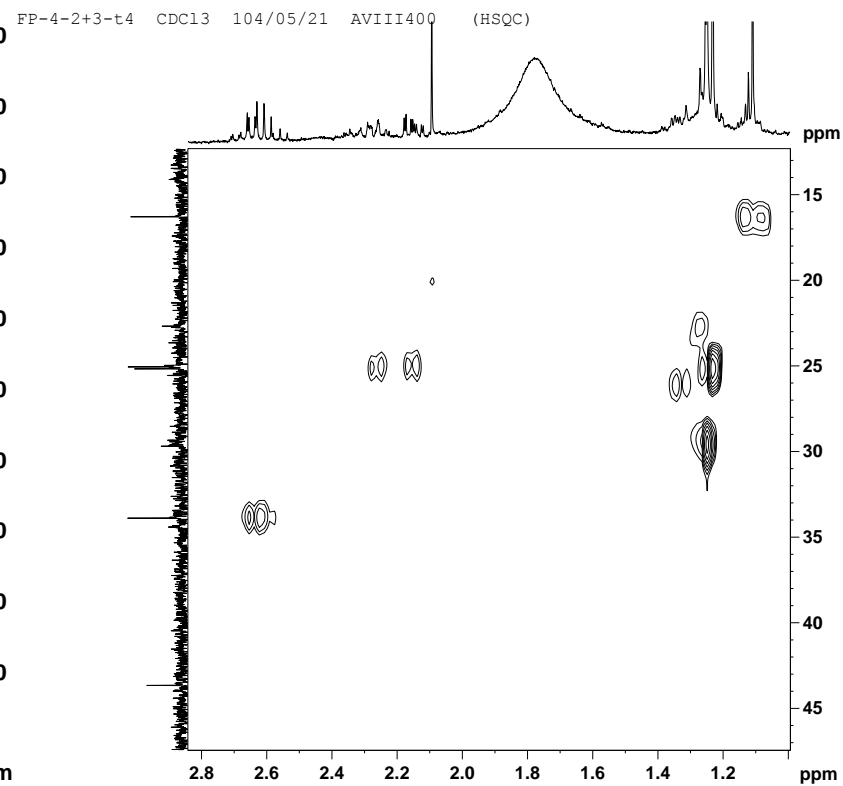

S 46 HMBC spectrum of fomitopin-G (7).

FP-4-2+3-t4 CDCl3 104/05/21 AVIII400 (HMBC)

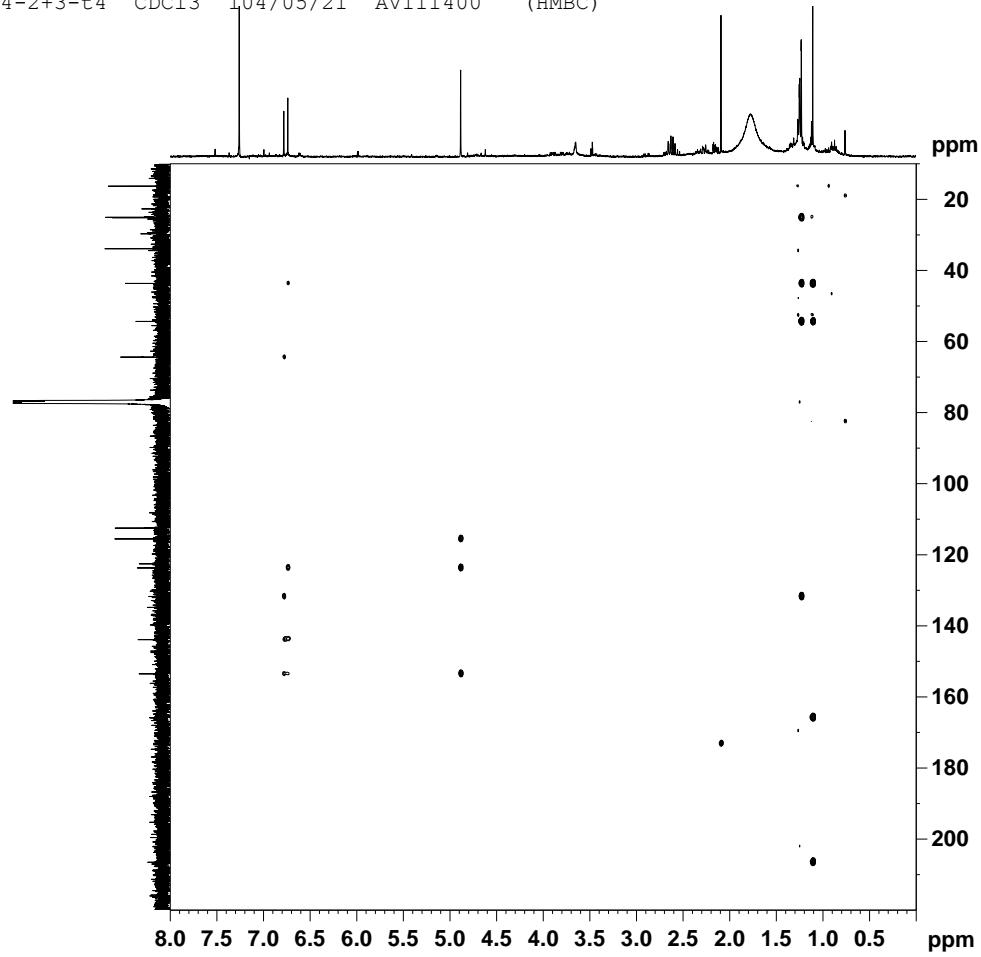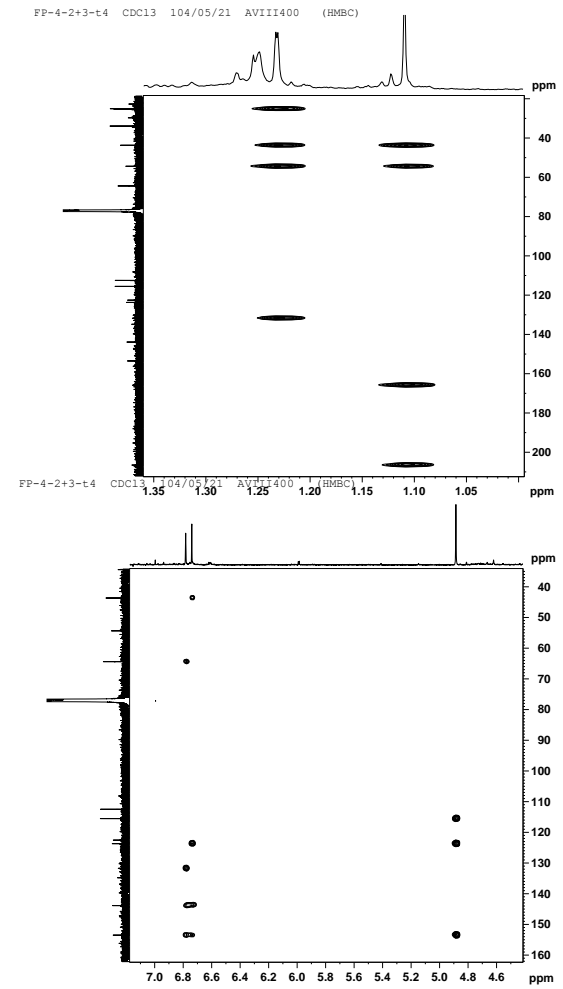

S 47 ECD spectrum of fomitopin-G (7).

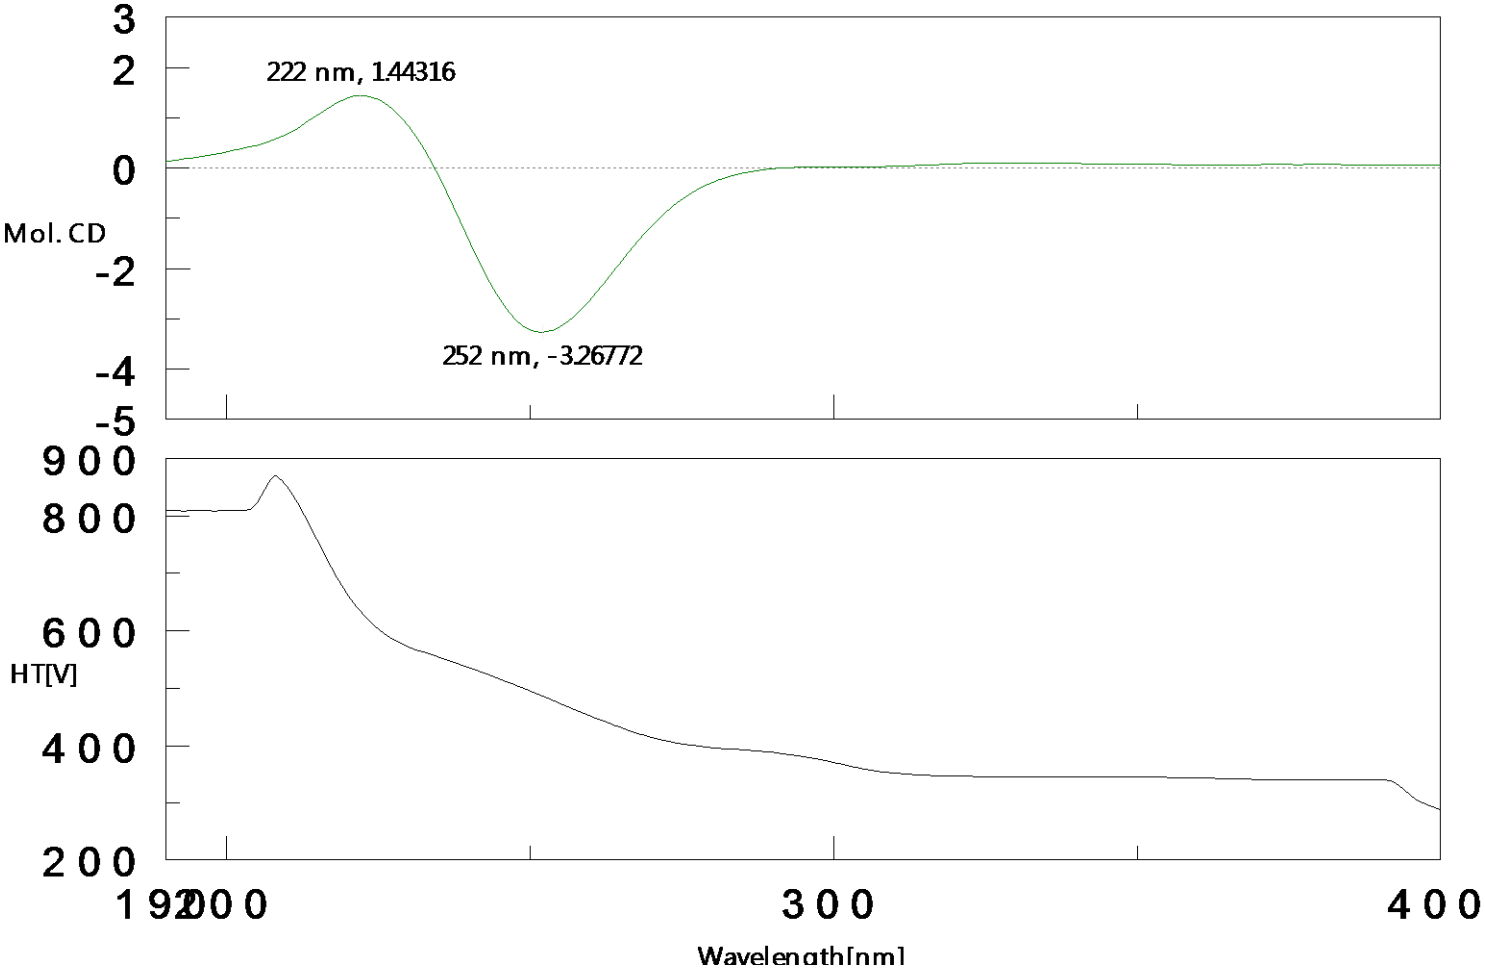

S 48 <sup>1</sup>H NMR (400 MHz, CDCl<sub>3</sub>) spectrum of fomitopin-H (8).

FP-5-9-3-1 Acetone 102/10/23 AVIII400 (H1)

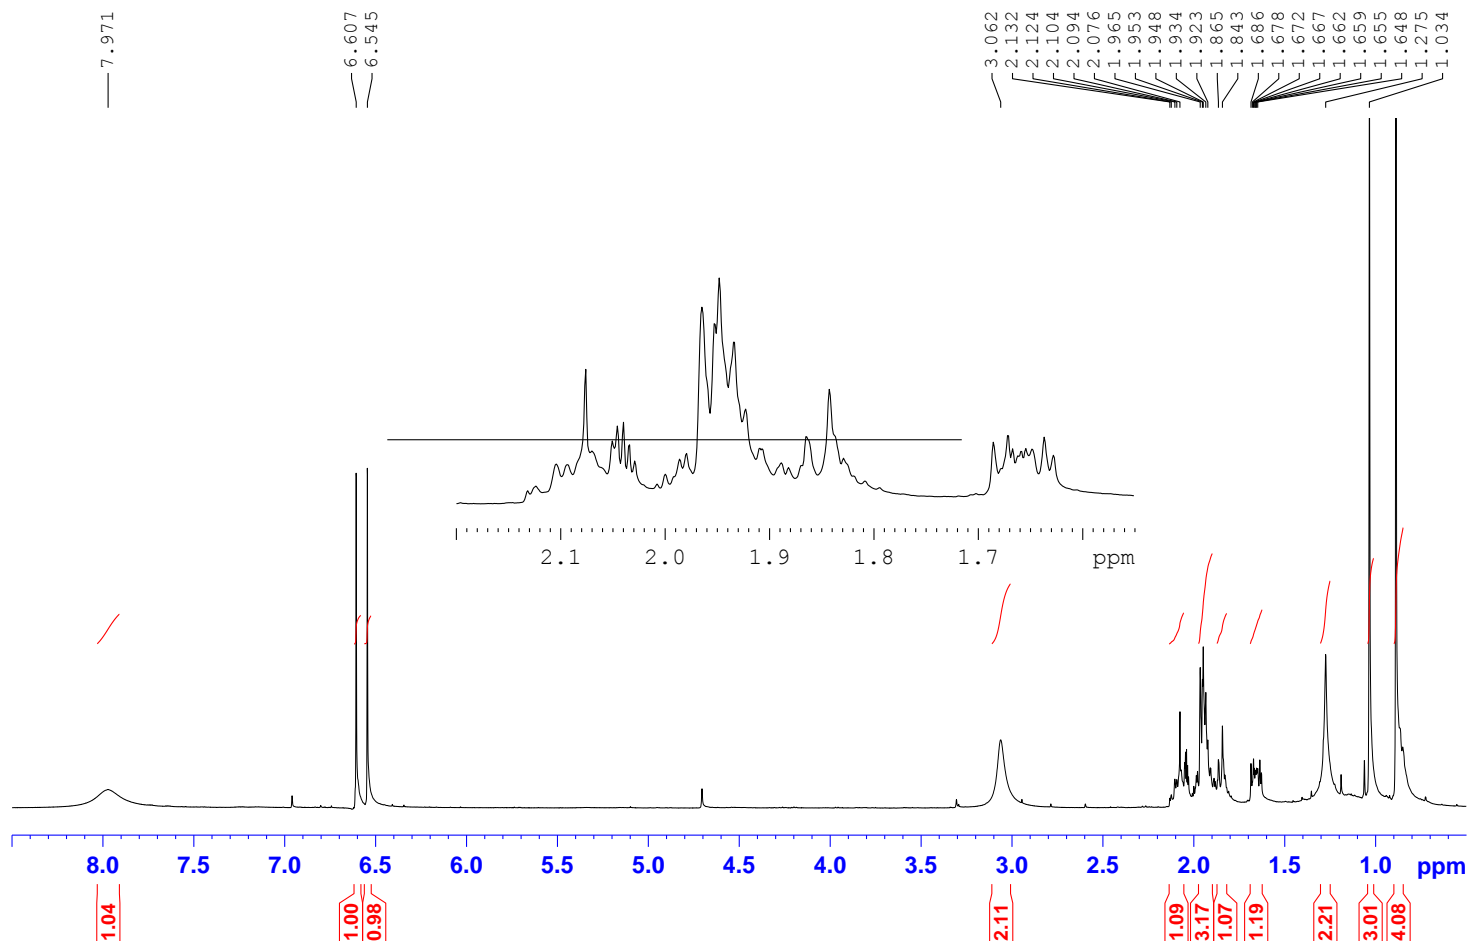

S 49 <sup>13</sup>C NMR (100 MHz, CDCl<sub>3</sub>) spectrum of fomitopin-H (8).

FP-5-9-3-1 Acetone-D6 102/10/9 AVIII400 (H1)

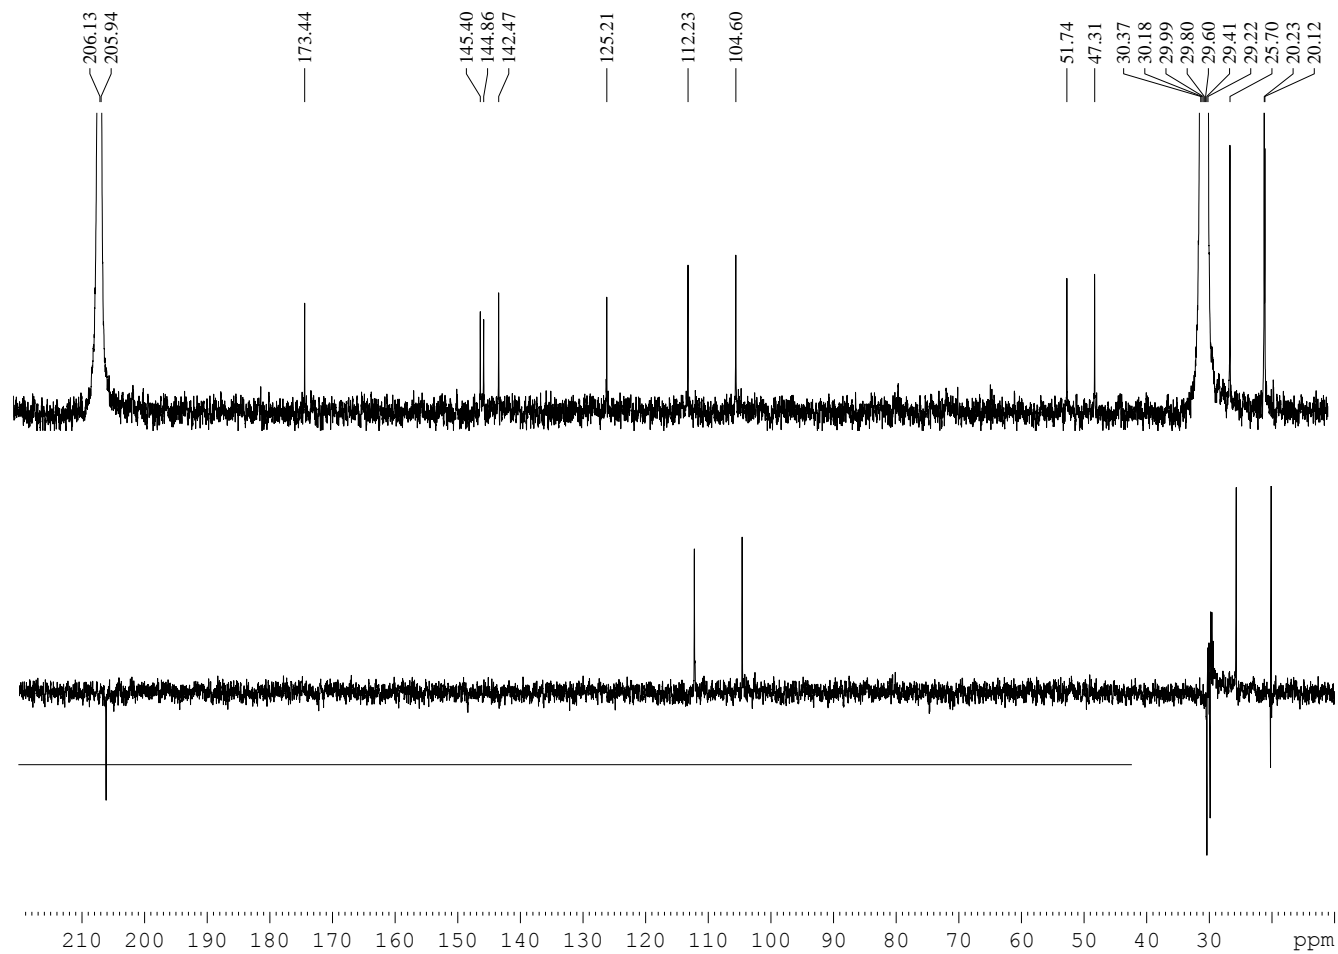

# S 50 COSY spectrum of fomitopin-H (8).

FP-5-9-3-1 Acetone 102/10/23 AVIII400 COSY90

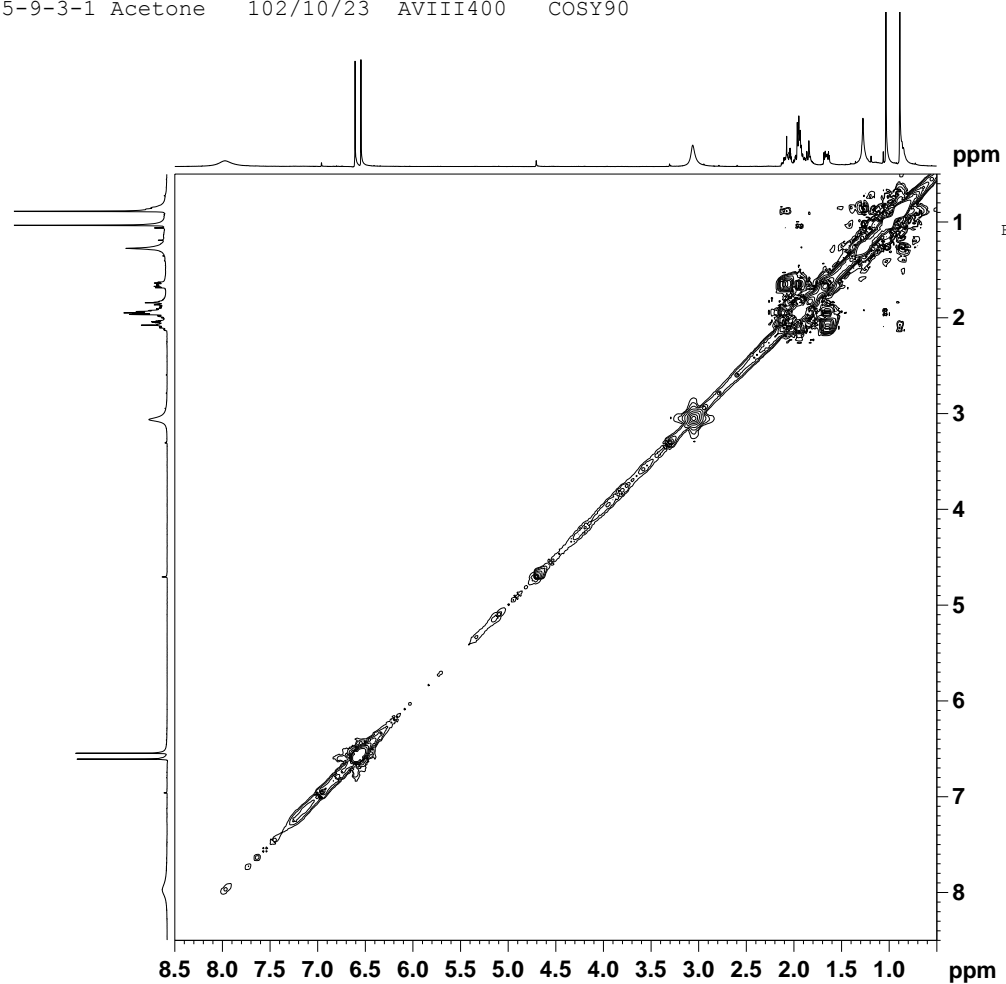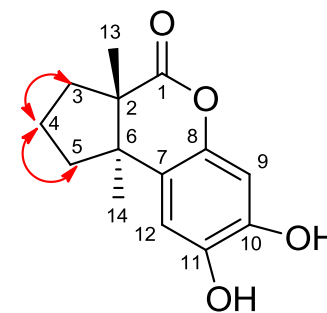

FP-5-9-3-1 Acetone 102/10/23 AVIII400 COSY90

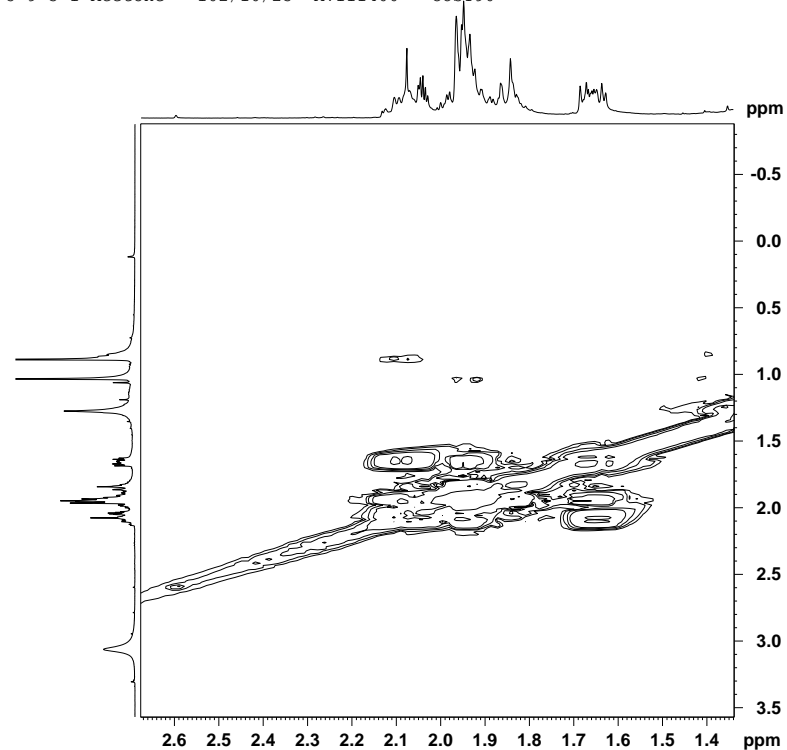



**S 51 HSQC spectrum and key of HSQC spectrum of fomitopin-H (8).**

FP-5-9-3-1 Acetone 102/10/23 AVIII400 HSQC

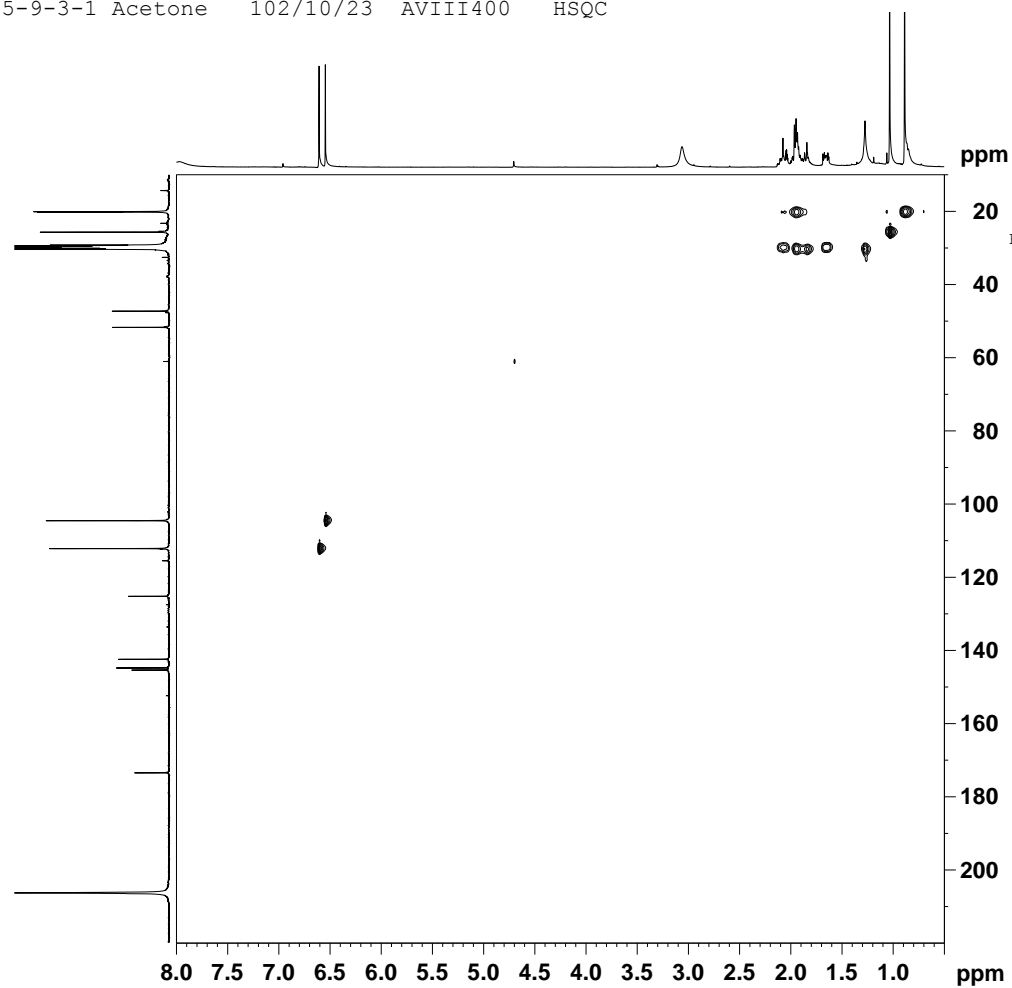

FP-5-9-3-1 Acetone 102/10/23 AVIII400 HSQC

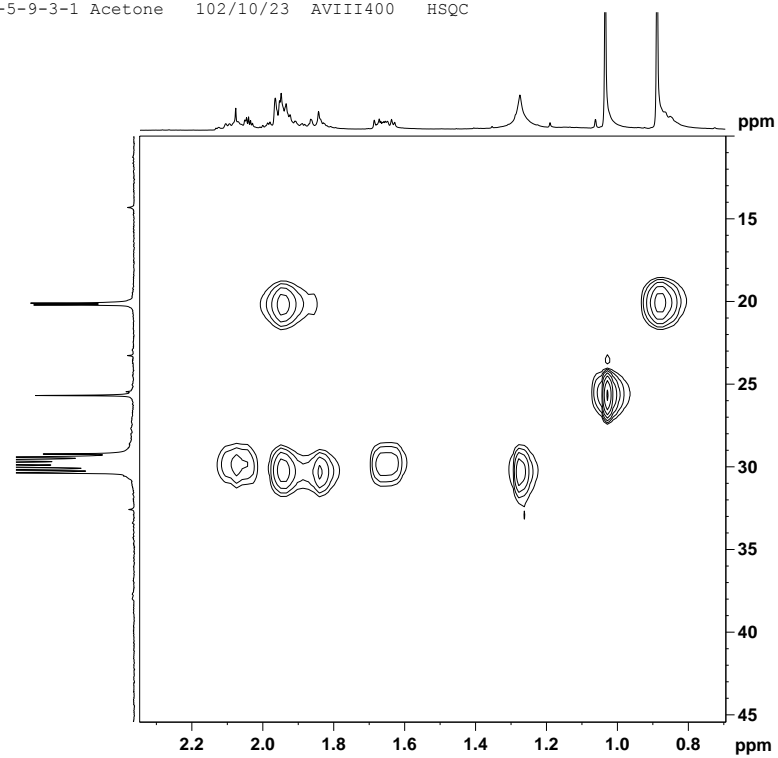

# S 52 HMBC spectrum of fomitopin-H (8).

FP-5-9-3-1 Acetone 102/10/23 AVIII400 HMBC

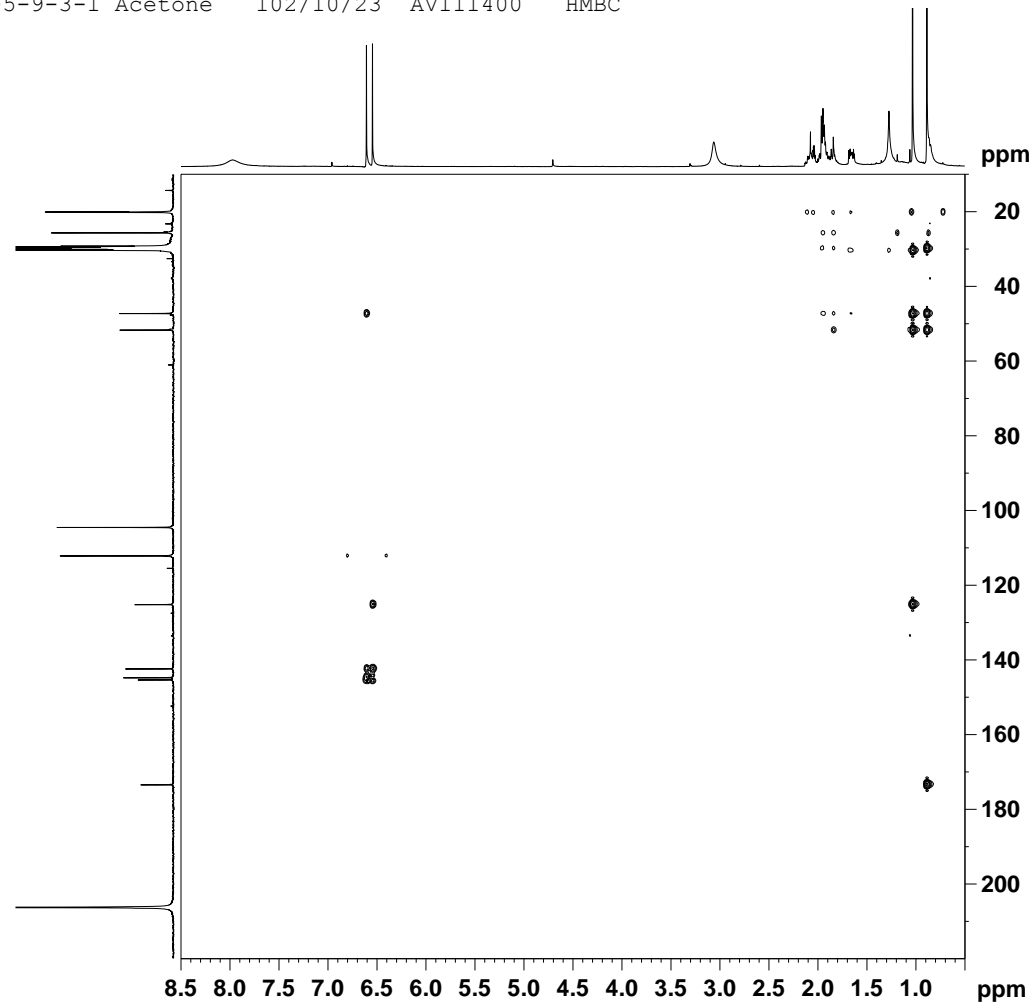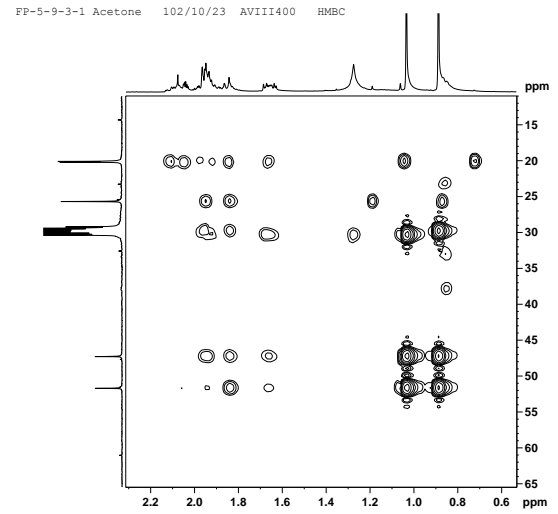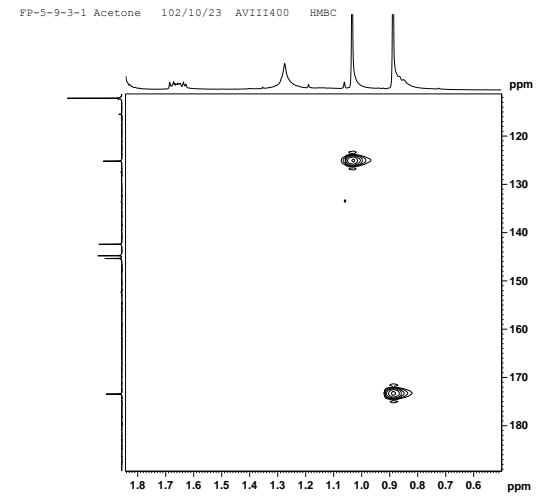

S 53 ECD spectrum of fomitopin-H (8).

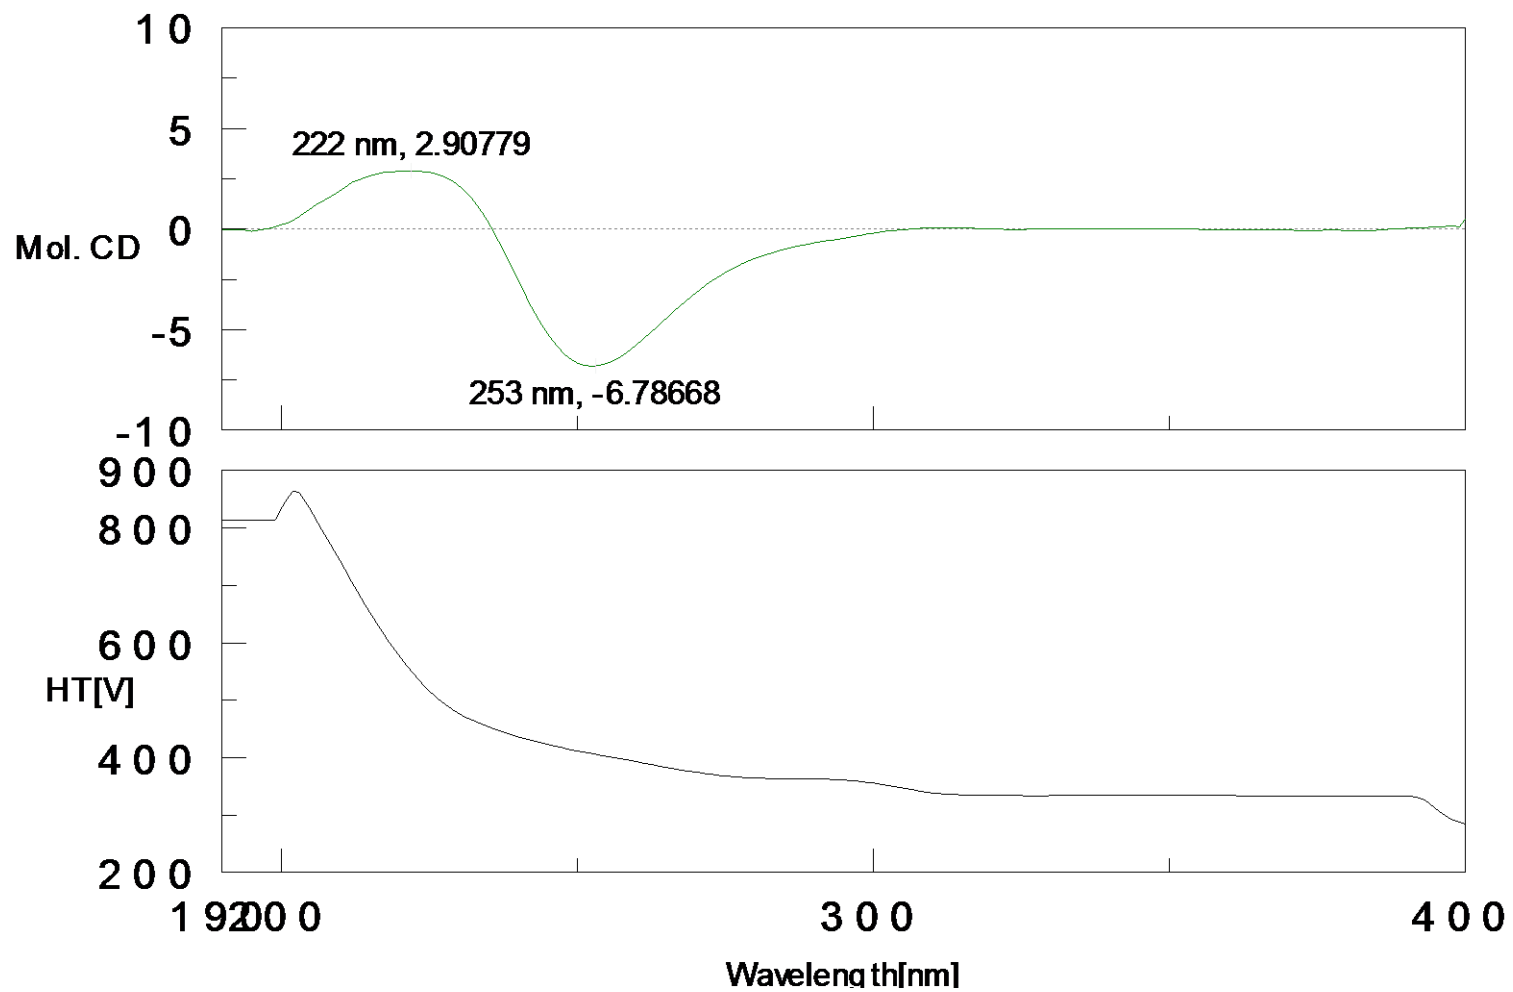

S 54 <sup>1</sup>H NMR (400 MHz, CDCl<sub>3</sub>) spectrum of fomitopin-I (9).

FP-6252-t5 CDCl<sub>3</sub> 103/08/02 AVIII400 (H1)

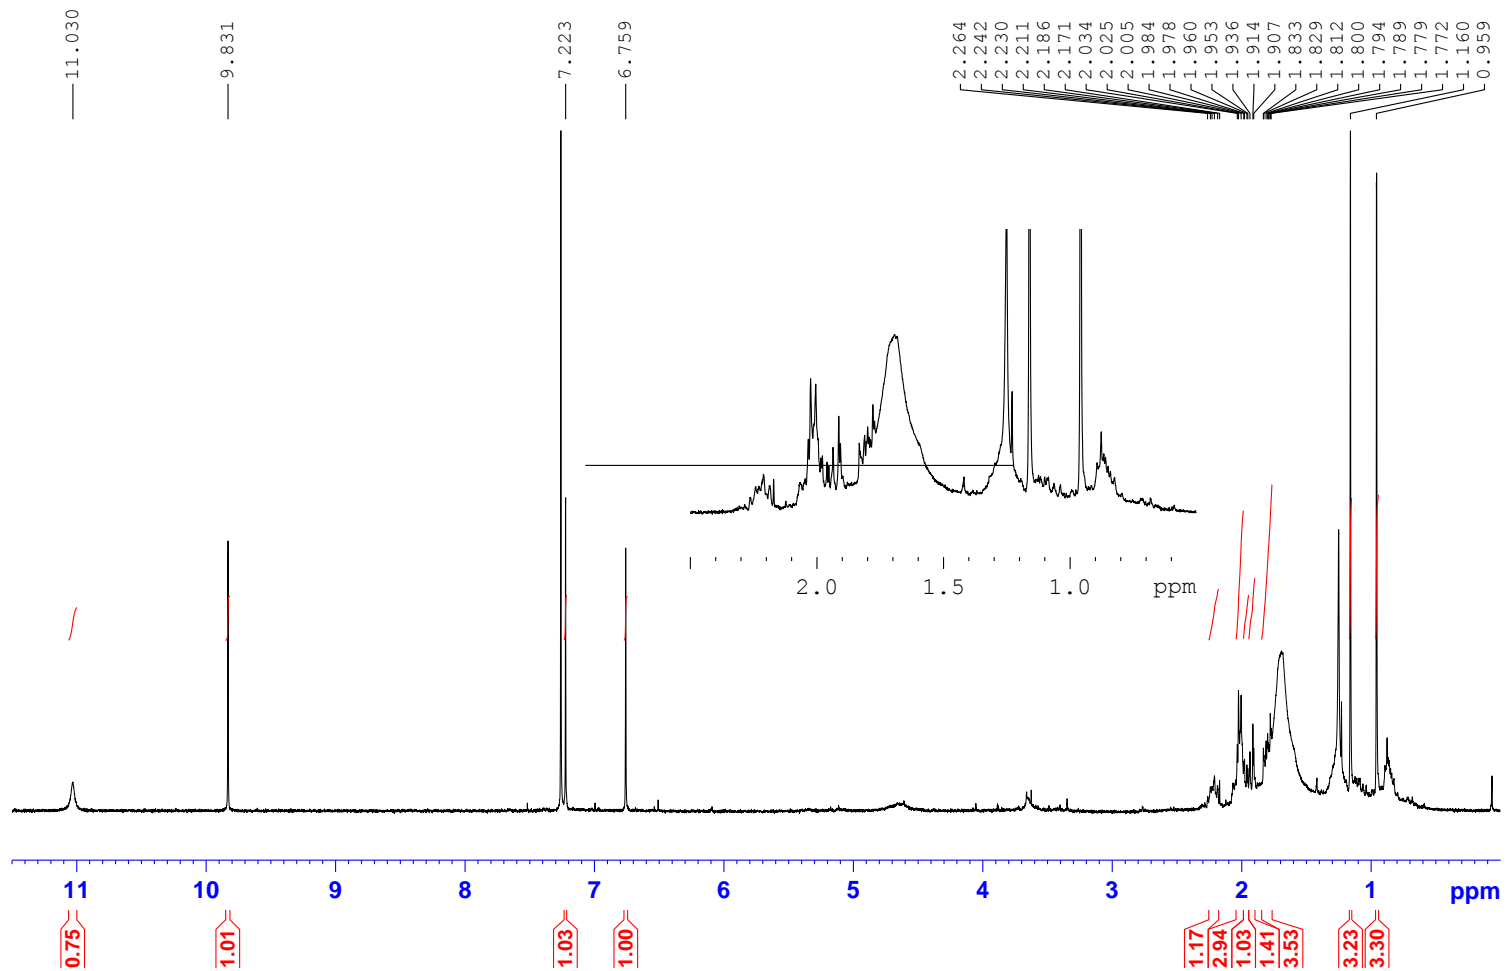

S 55 <sup>13</sup>C NMR (100 MHz, CDCl<sub>3</sub>) spectrum of fomitopin-I (9).

FP-6252-t5 CDCl<sub>3</sub> 103/08/02 AVIII400 (DEPT135)

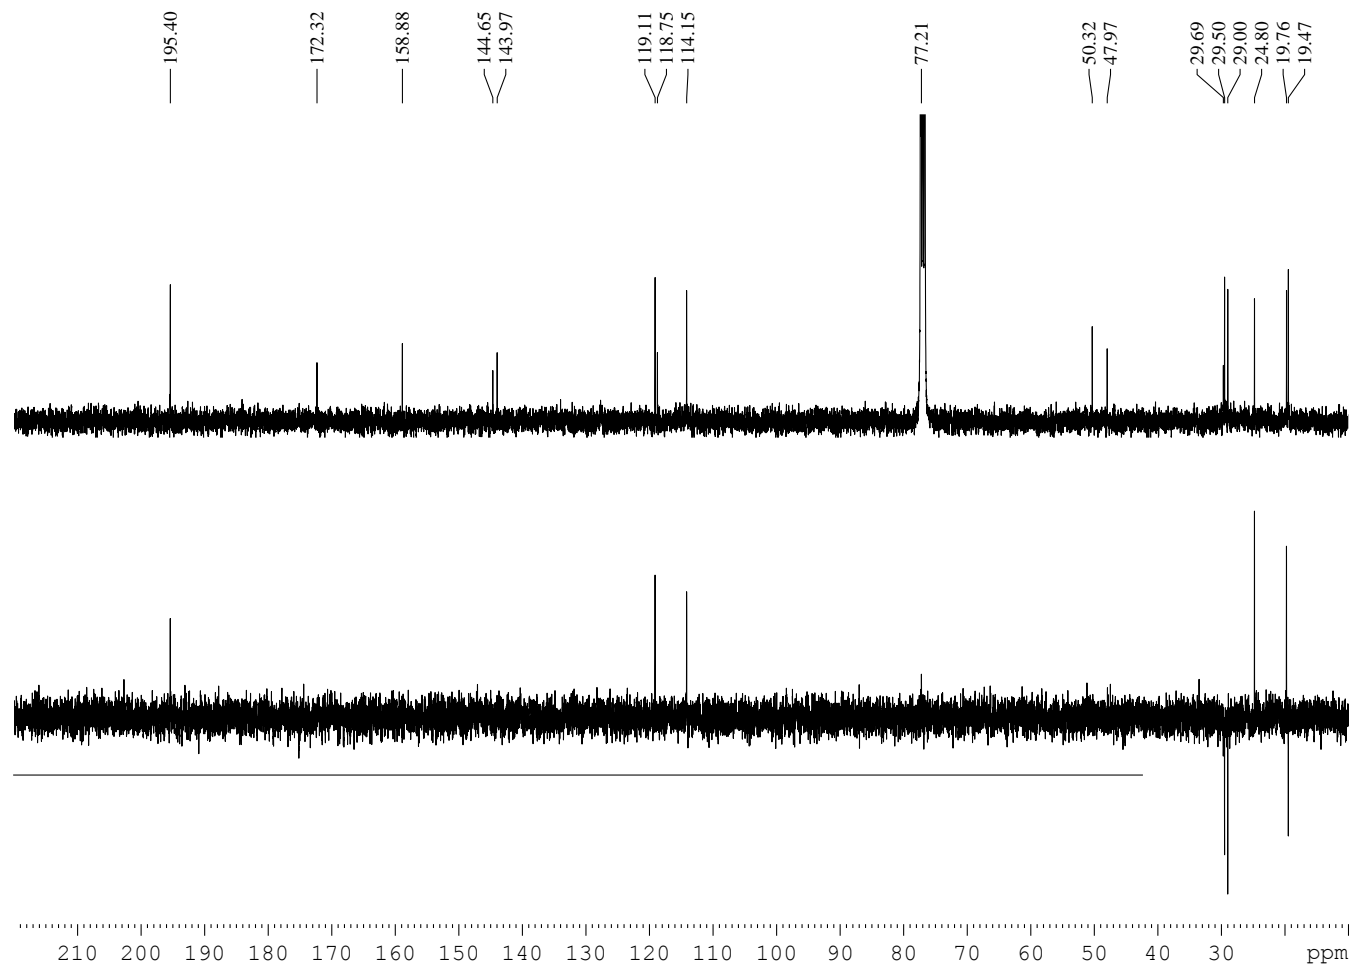

### S 56 COSY spectrum of fomitopin-I (9).

FP-6252-t5 CDC13 103/08/02 AVIII400 (COSY90)

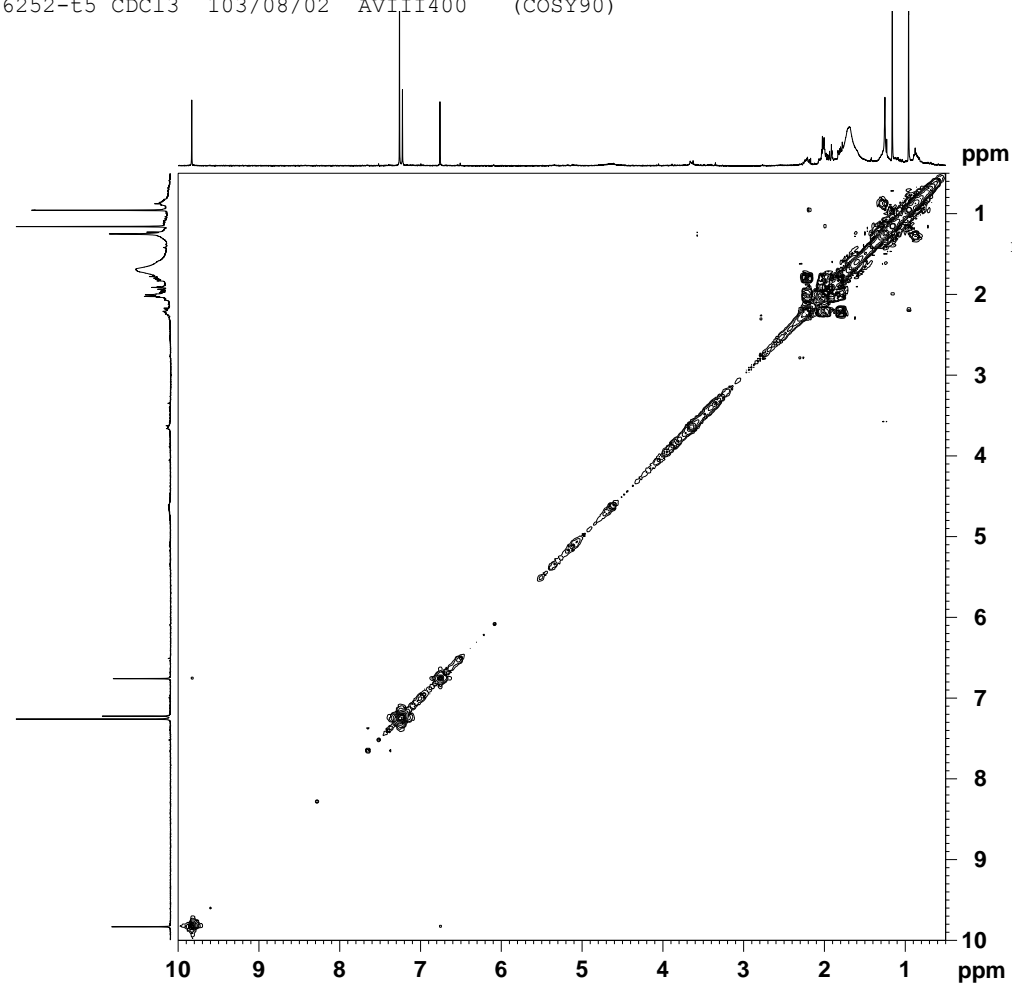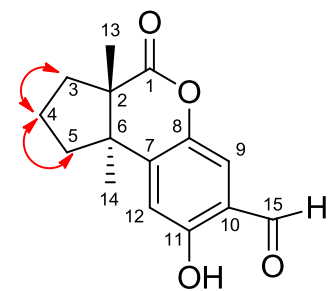

FP-6252-t5 CDC13 103/08/02 AVIII400 (COSY90)

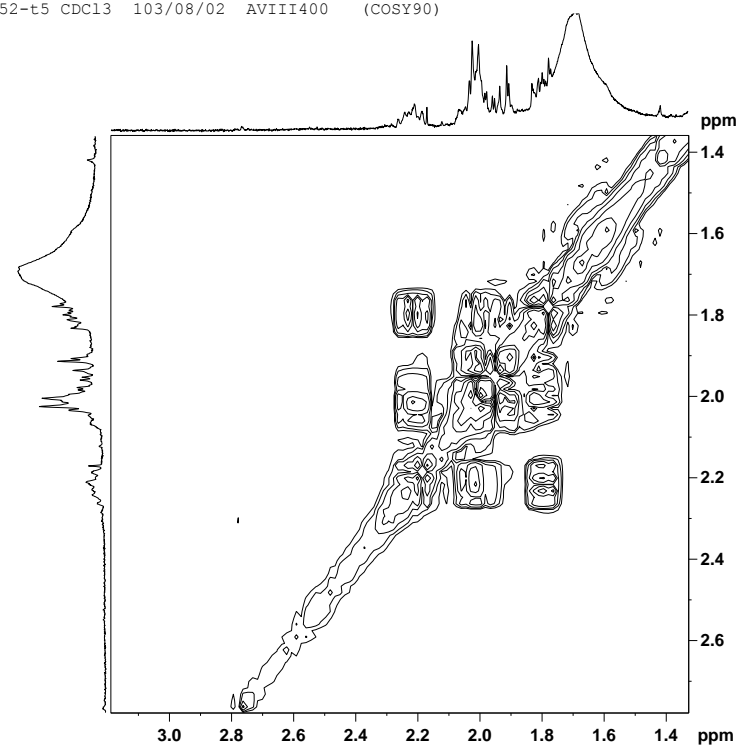

# S 57 HSQC spectrum and key of HSQC spectrum of fomitopin-I (9).

FP-6252-t5 CDC13 103/08/02 AVIII400 (HSQC)

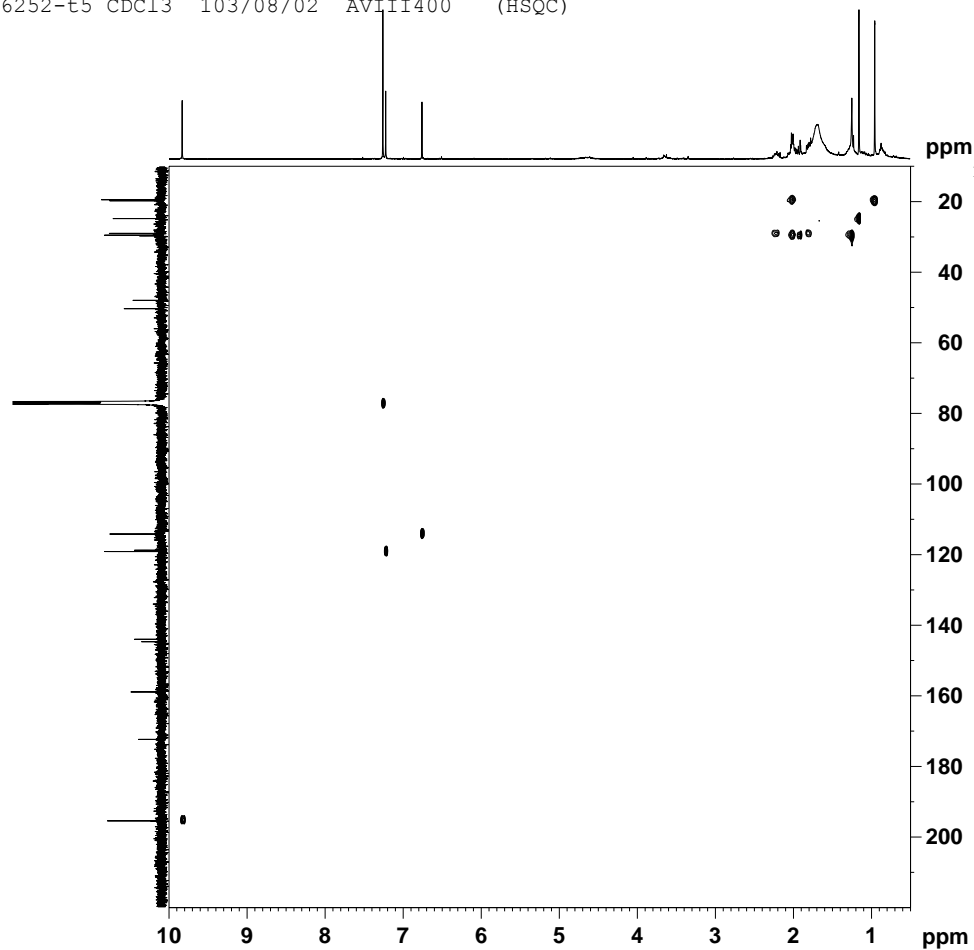

FP-6252-t5 CDC13 103/08/02 AVIII400 (HSQC)

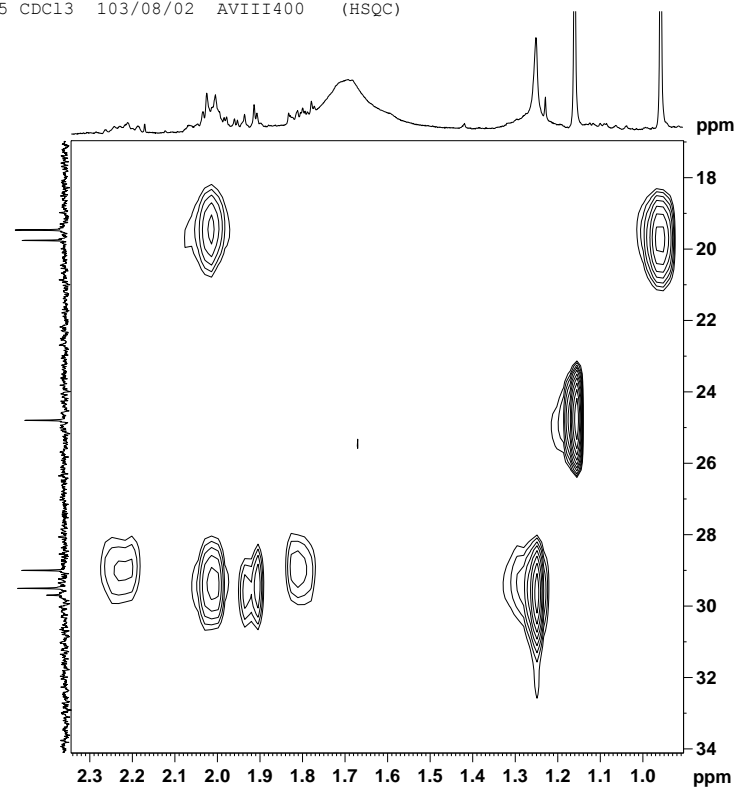

# S 58 HMBC spectrum of fomitopin-I (9).

FP-6252-t5 CDC13 103/08/02 AVIII400 (HMBC)

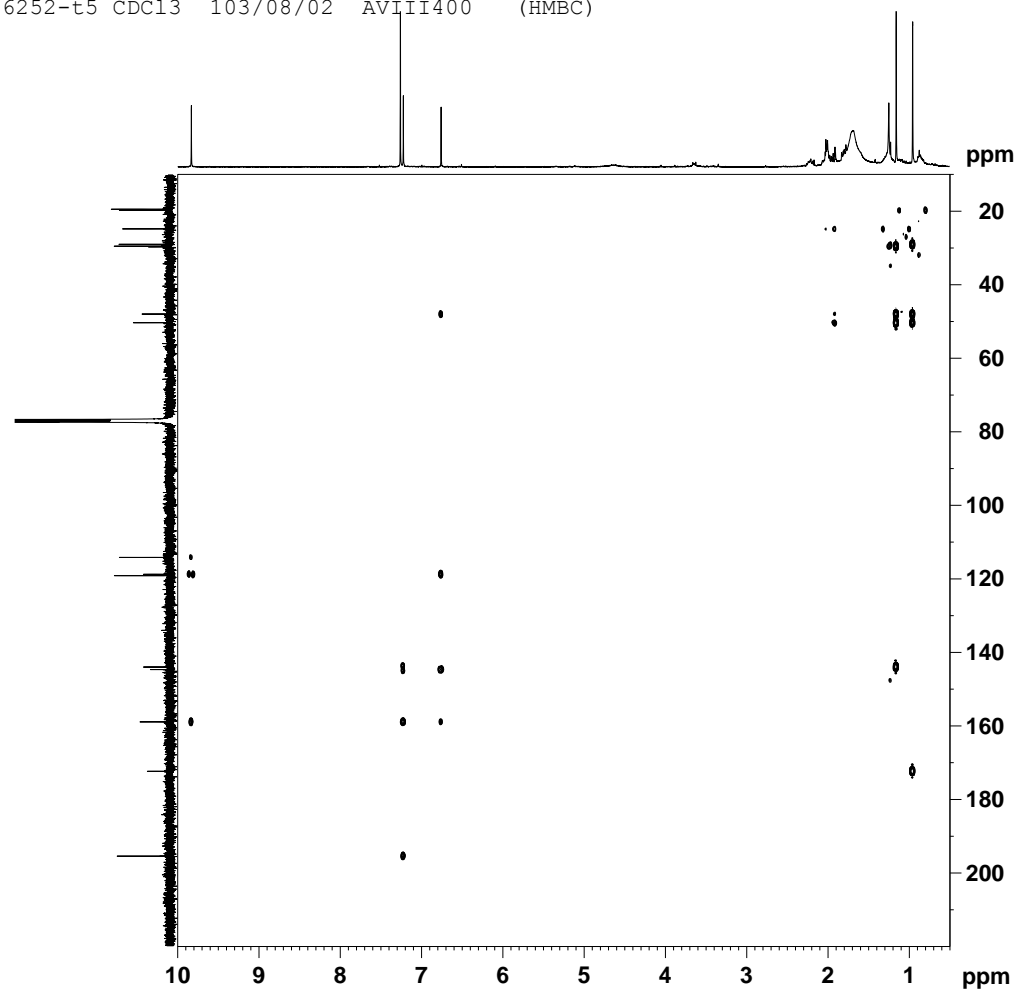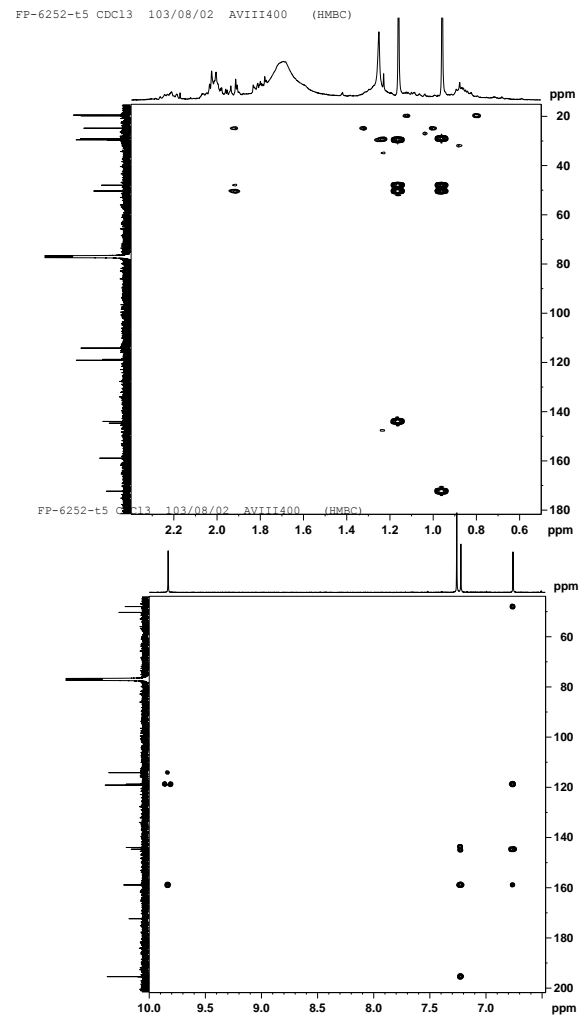



S 59 ECD spectrum of fomitopin-I (9).

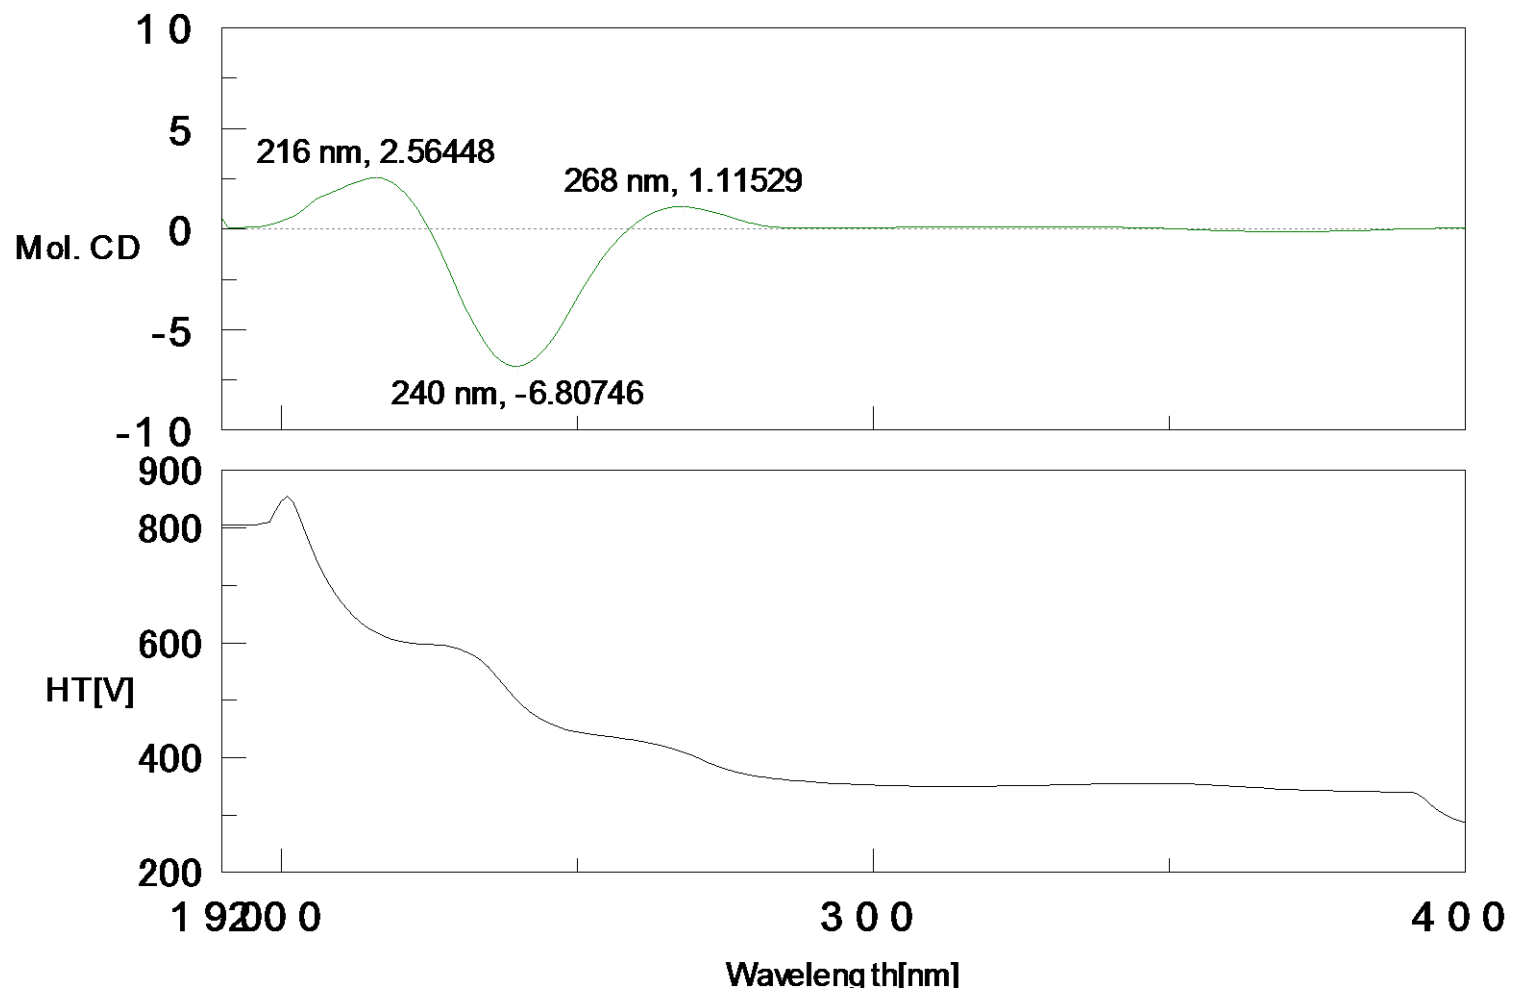

S 60 <sup>1</sup>H NMR (400 MHz, CDCl<sub>3</sub>) spectrum of fomitopin-J (10).

FP-62-10-5-5-t1 CDCl<sub>3</sub> 103/09/20 AVIII400 (H1)

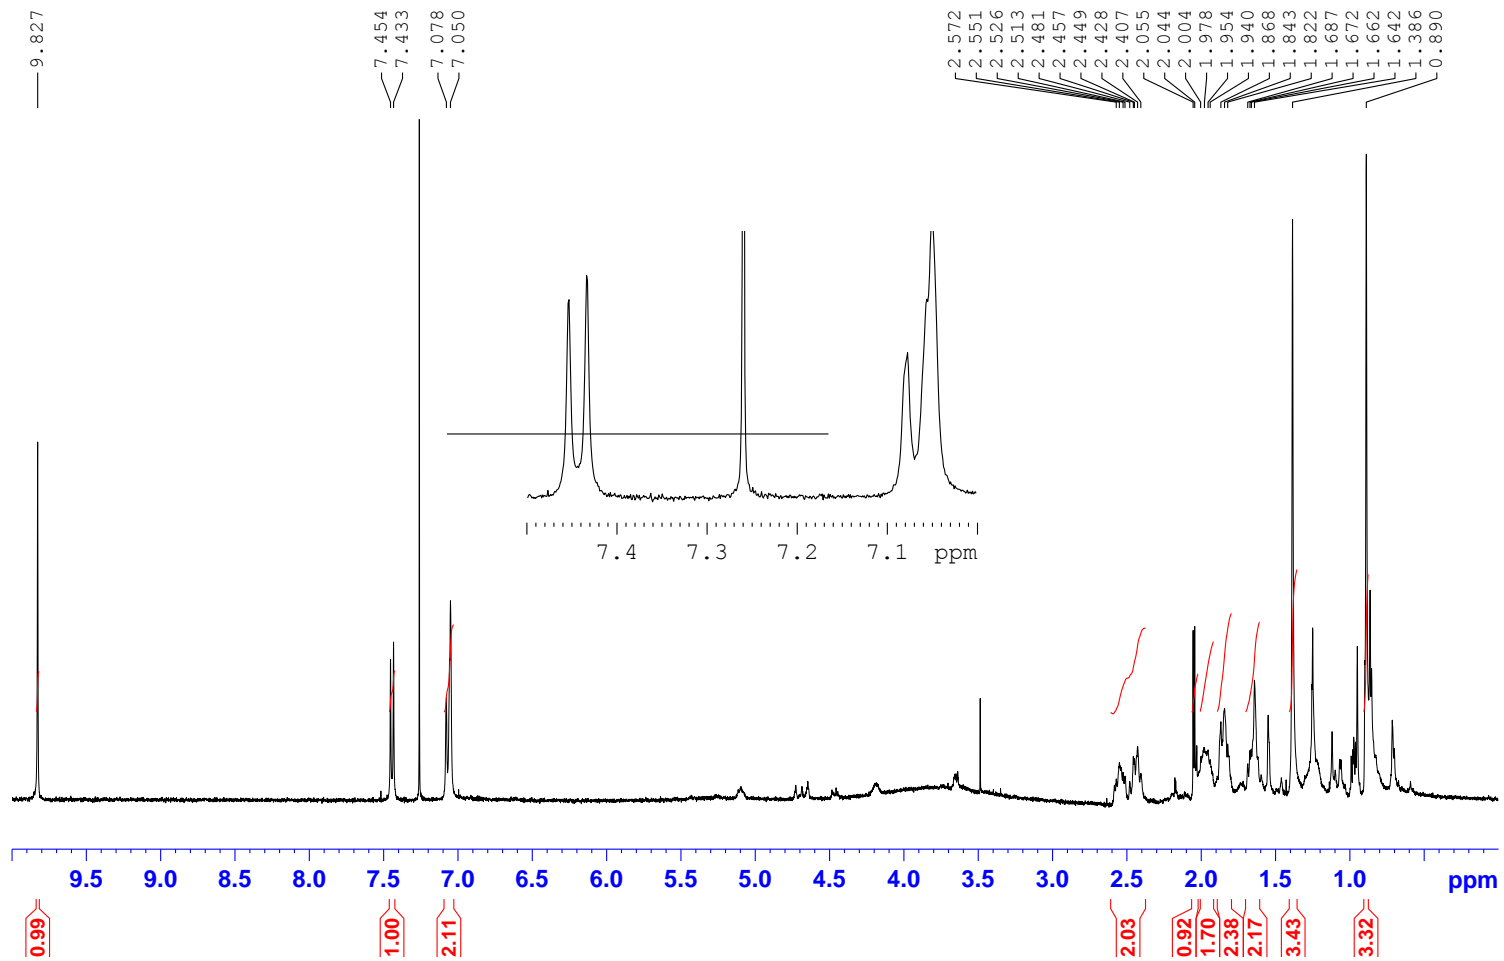

**S 61 <sup>13</sup>C NMR (100 MHz, CDCl<sub>3</sub>) spectrum of fomitopin-J (10).**

FP-62-10-5-5-t1 CDCl<sub>3</sub> 103/09/20 AVIII400 (DEPT135)

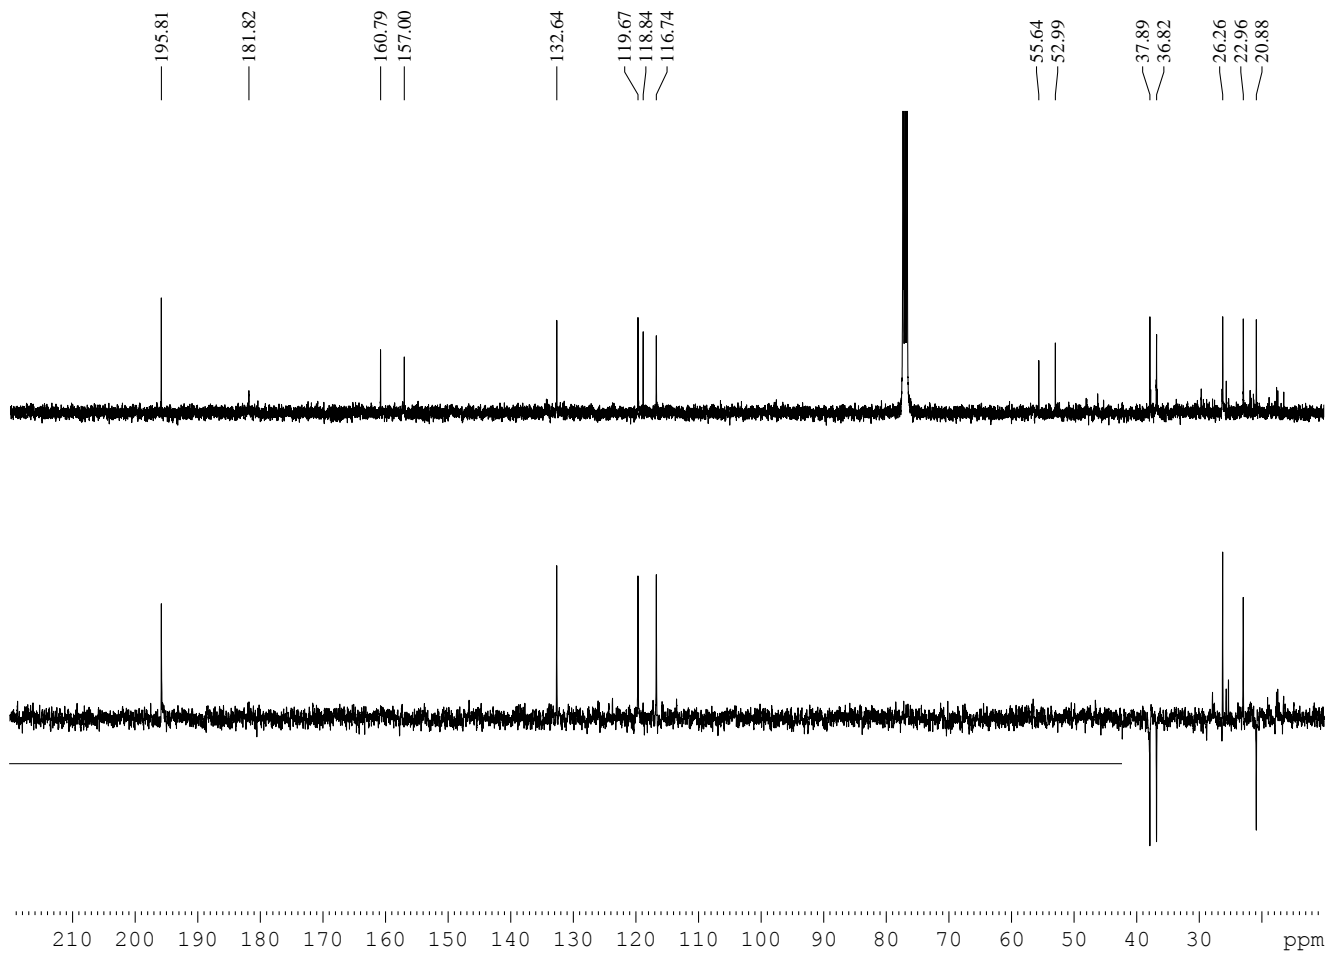

**S 62 COSY spectrum of fomitopin-J (10).**

FP-62-10-5-5-t1 CDC13 103/09/20 AVIII400 (COSY90)

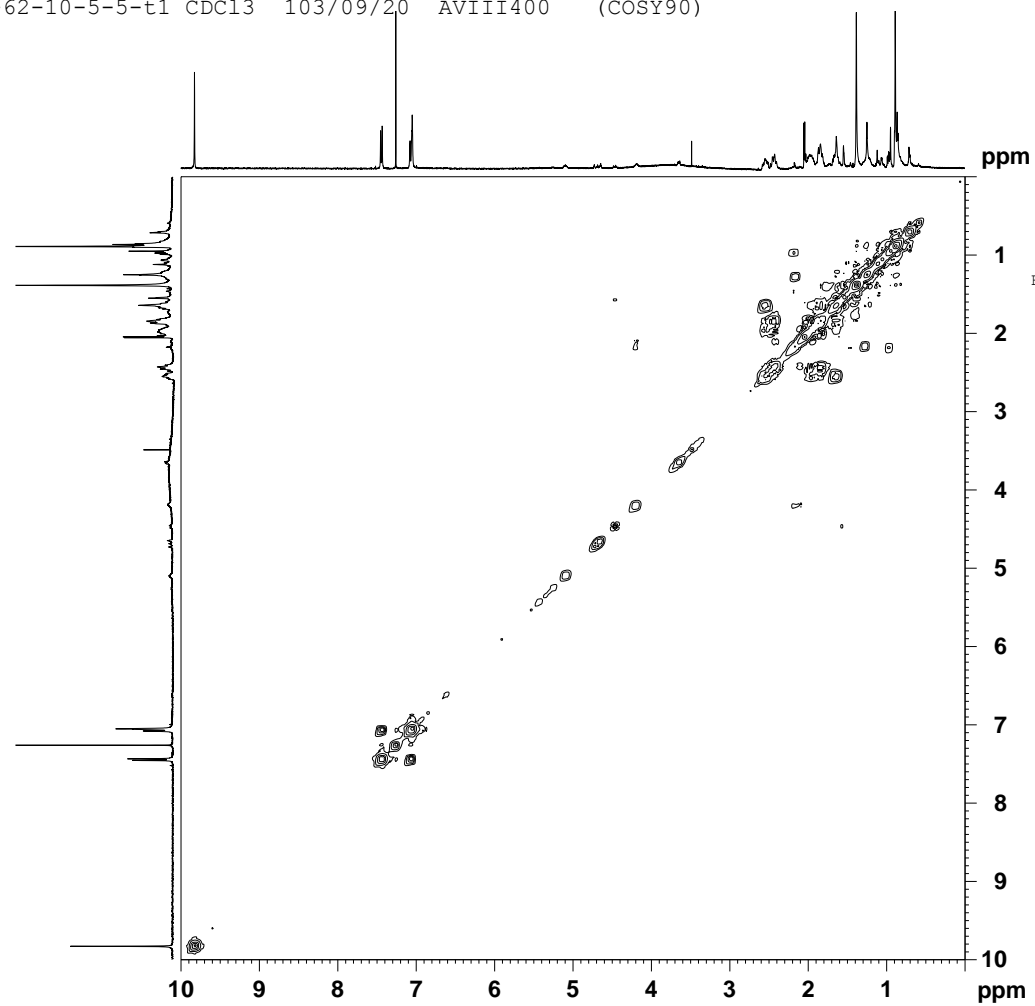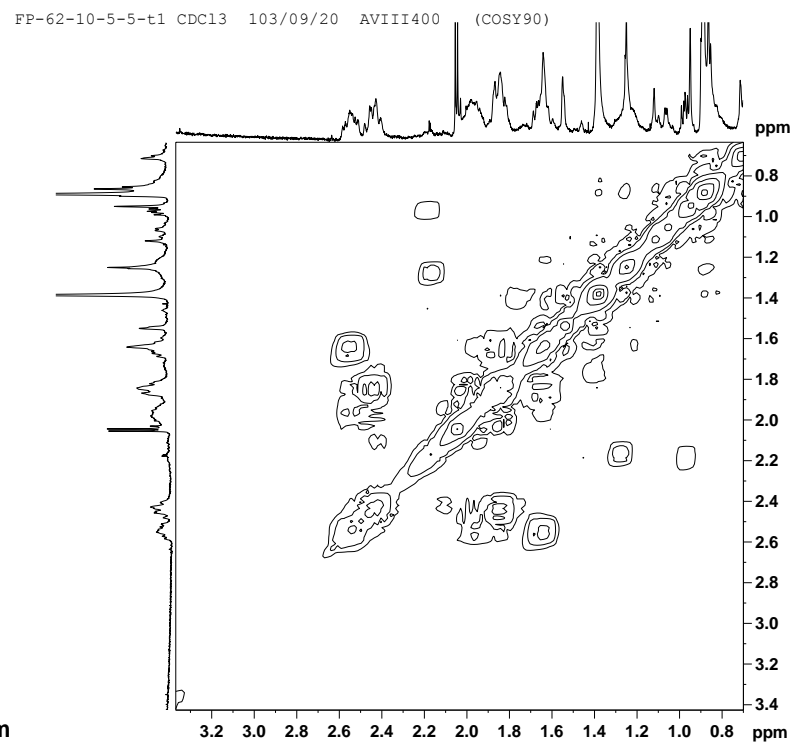

# S 63 NOESY spectrum and key of NOESY spectrum of fomitopin-J (10).

FP-62-10-5-5-t1 CDC13 103/09/20 AVIII400 (NOESY)

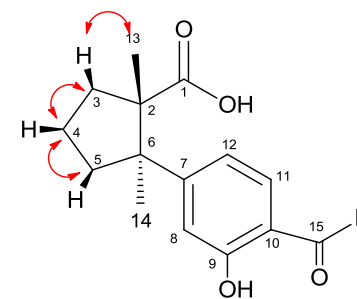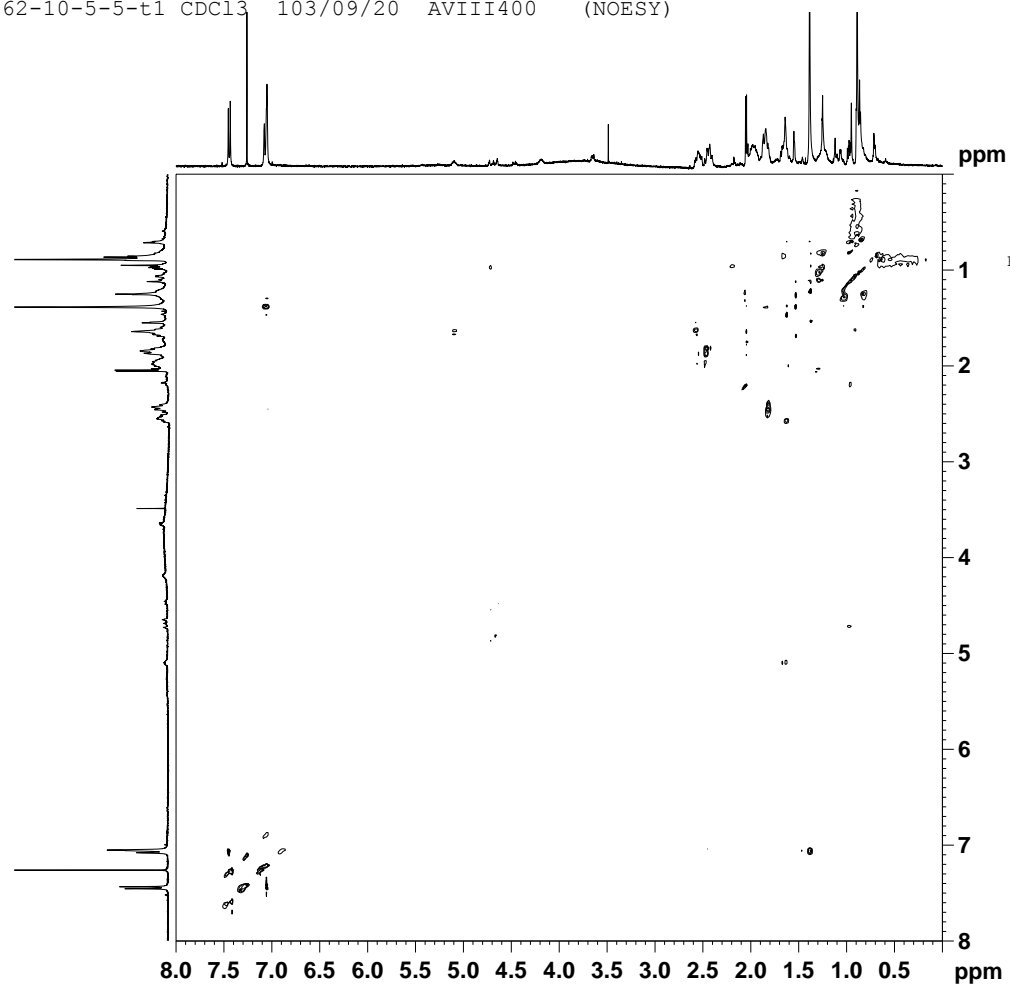

FP-62-10-5-5-t1 CDC13 103/09/20 AVIII400 (NOESY)

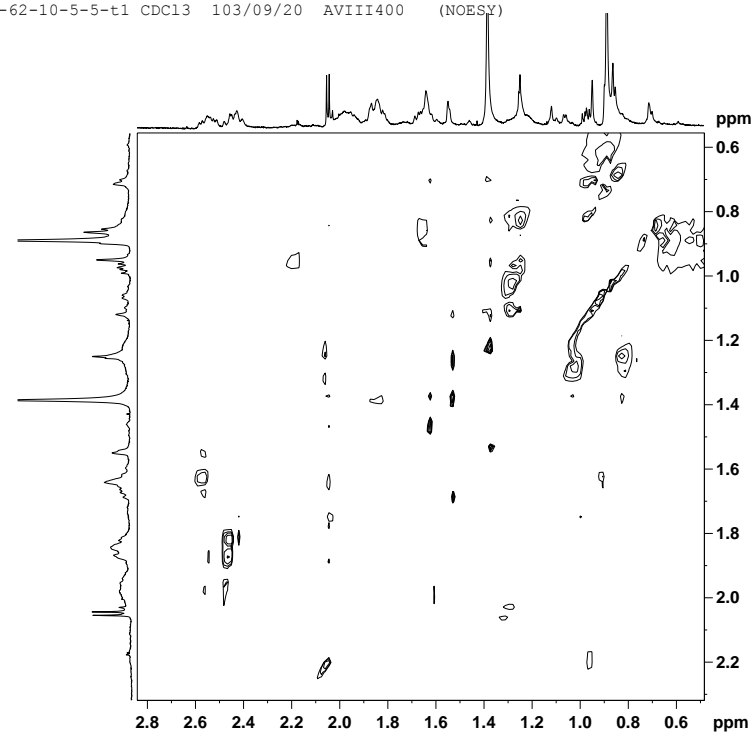

**S 64 HSQC spectrum and key of HSQC spectrum of fomitopin-J (10).**

FP-62-10-5-5-t1 CDC13 103/09/20 AVIII400 (HSQC)

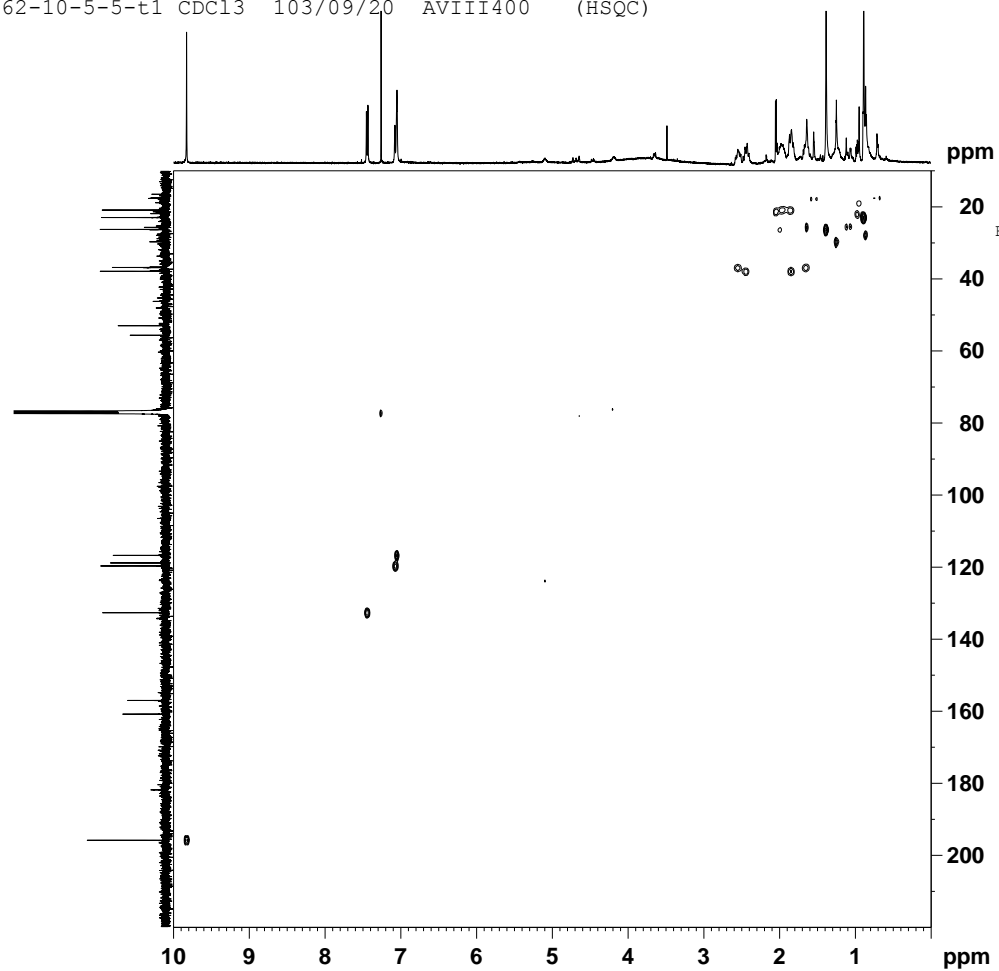

FP-62-10-5-5-t1 CDC13 103/09/20 AVIII400 (HSQC)

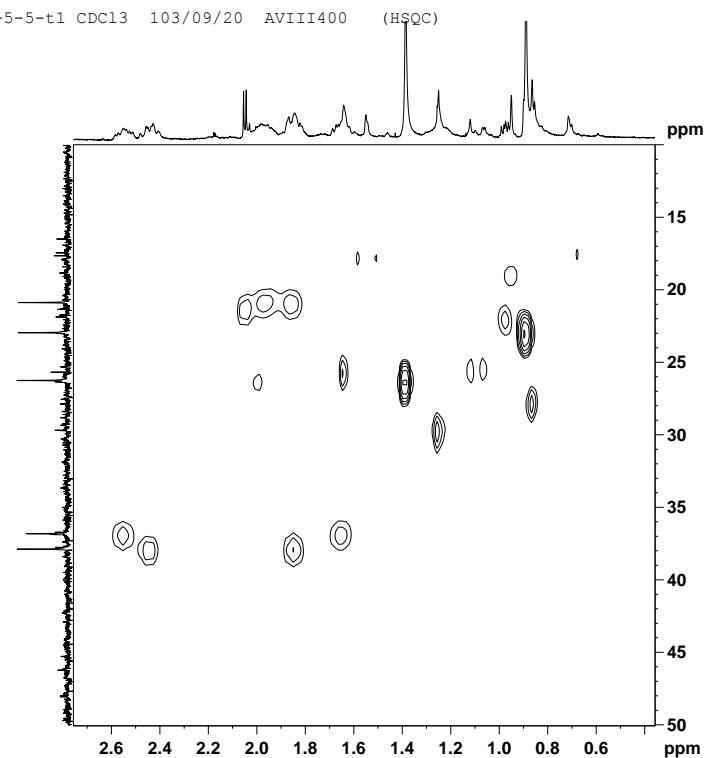

**S 65 HMBC spectrum of fomitopin-J (10).**

FP-62-10-5-5-t1 CDC13 103/09/20 AVIII400 (HMBC)

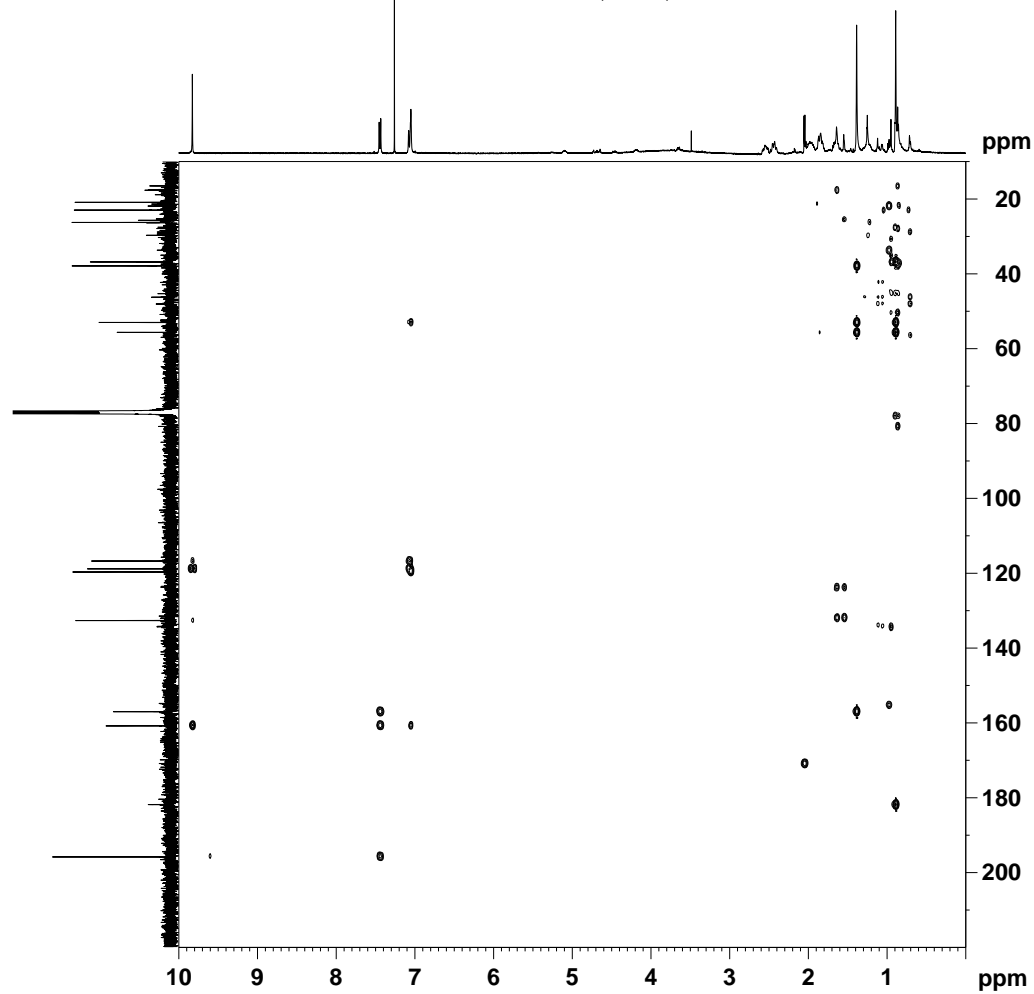

FP-62-10-5-5-t1 CDC13 103/09/20 AVIII400 (HMBC)

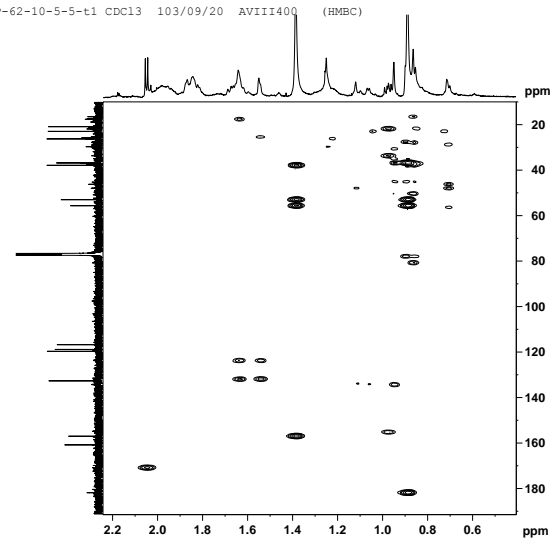

FP-62-10-5-5-t1 CDC13 103/09/20 AVIII400 (HMBC)

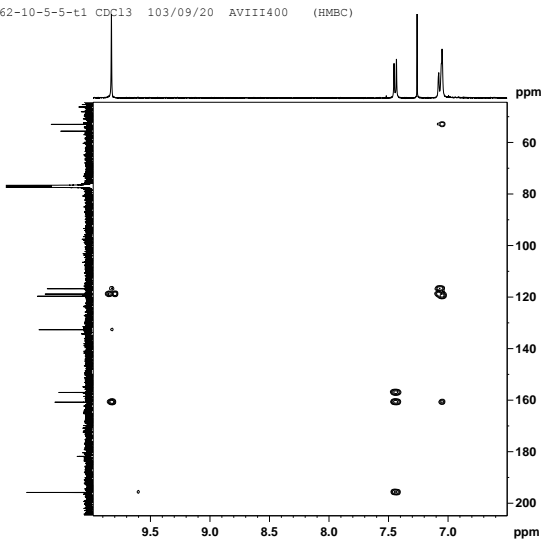

S 66 ECD spectrum of fomitopin-J (10).

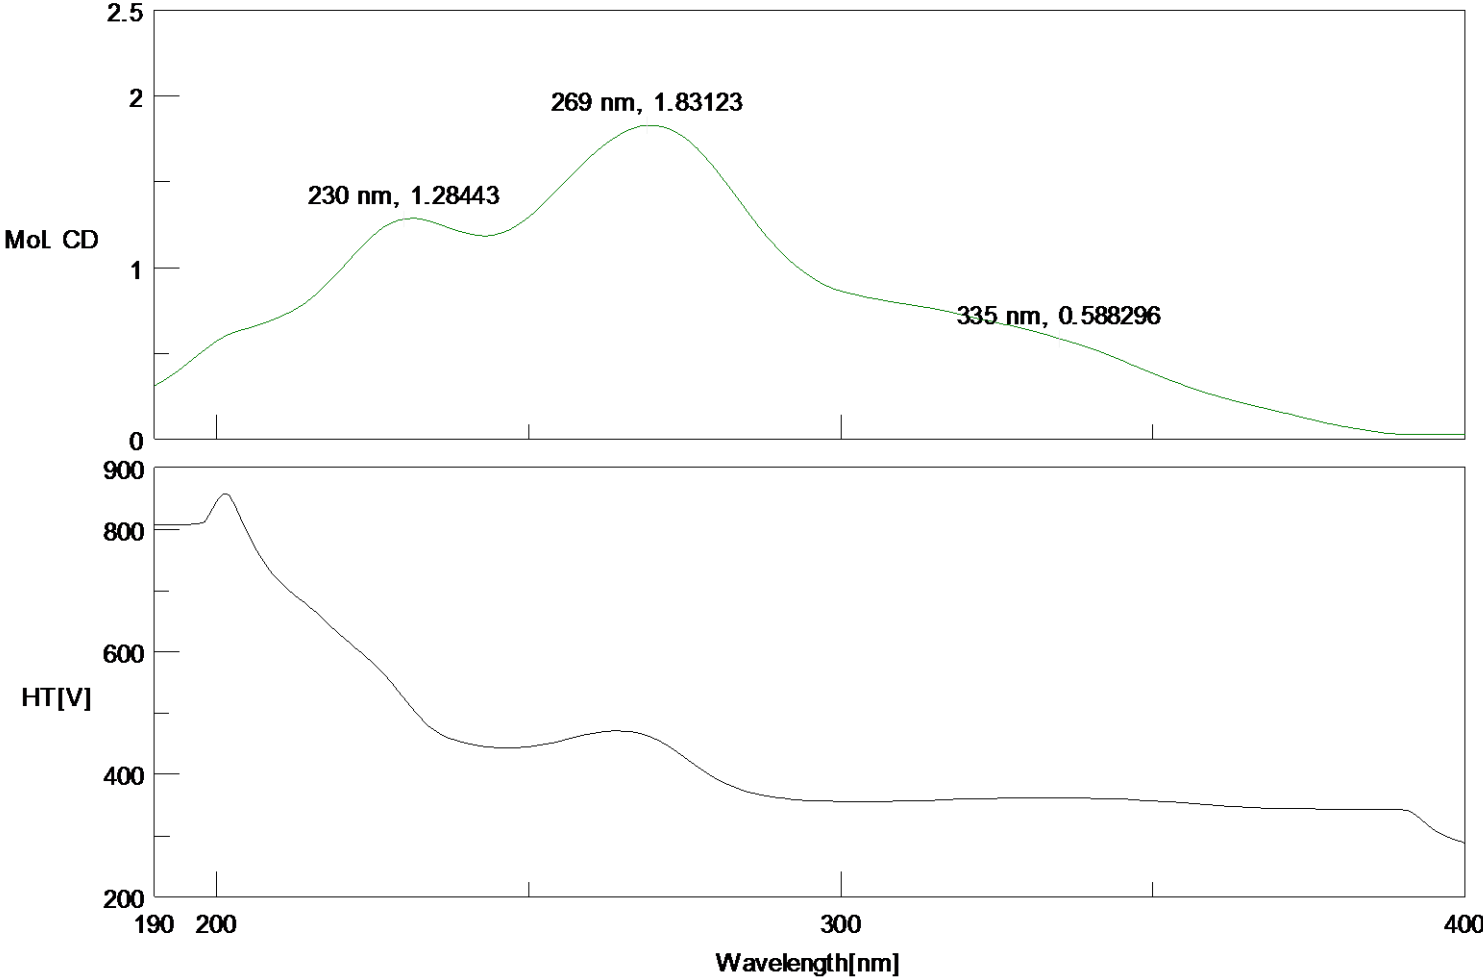



S 67 <sup>1</sup>H NMR (400 MHz, Acetone-d<sub>6</sub>) spectrum of fomitopin-K (11).

FP-5-13-8-2C Acetone 102/12/15 AVIII400 (H1)

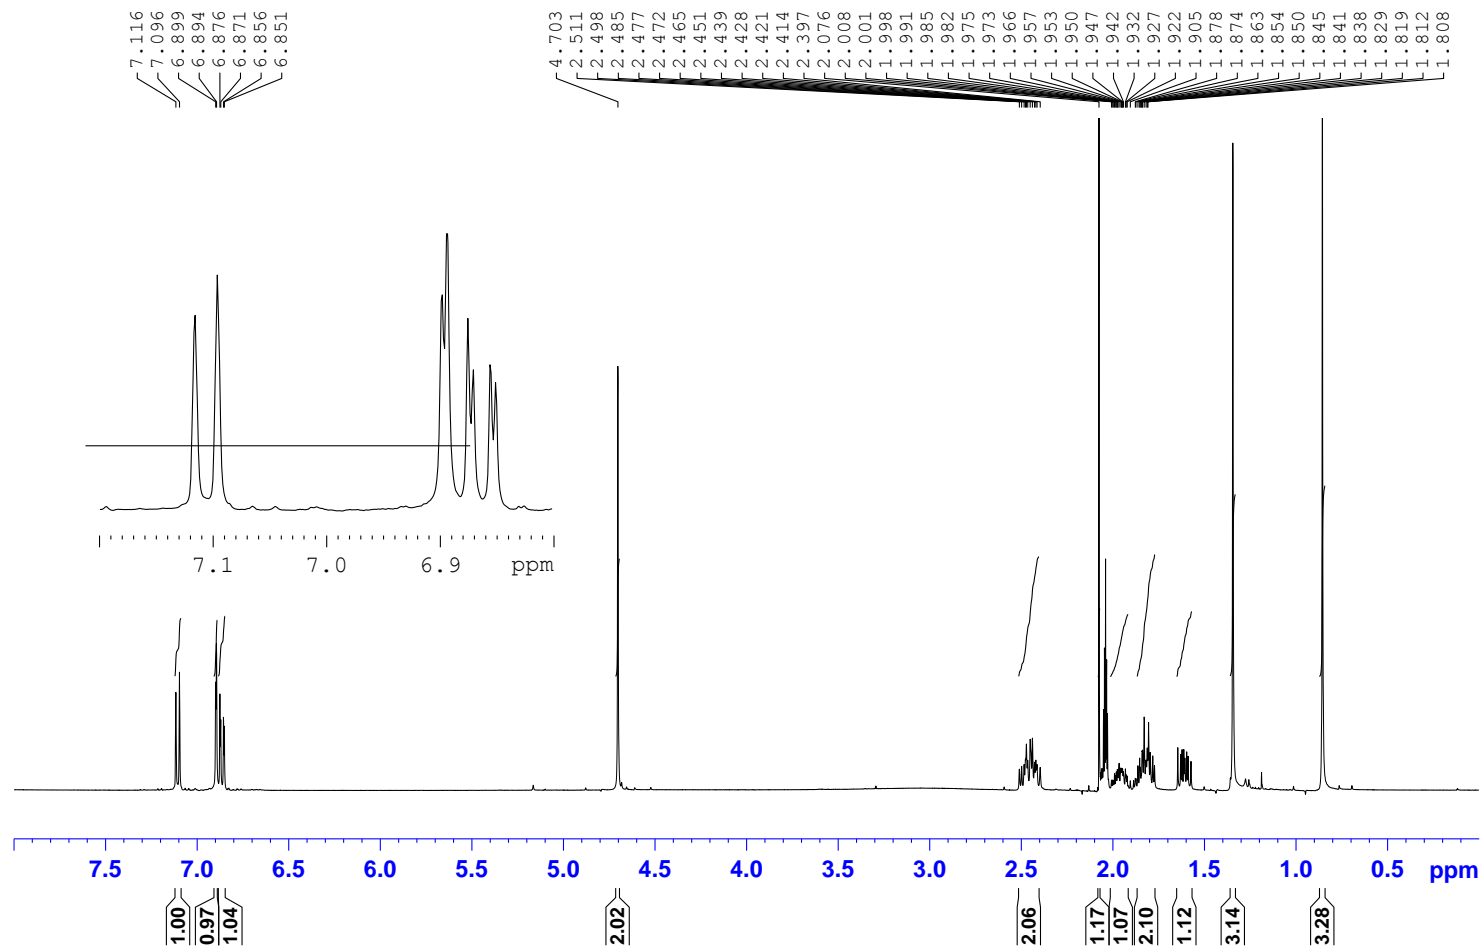

**S 68 <sup>13</sup>C NMR (100 MHz, Acetone-d<sub>6</sub>) spectrum of fomitopin-K (11).**

FP-5-13-8-2C Acetone 102/12/15 AVIII400 (C13)

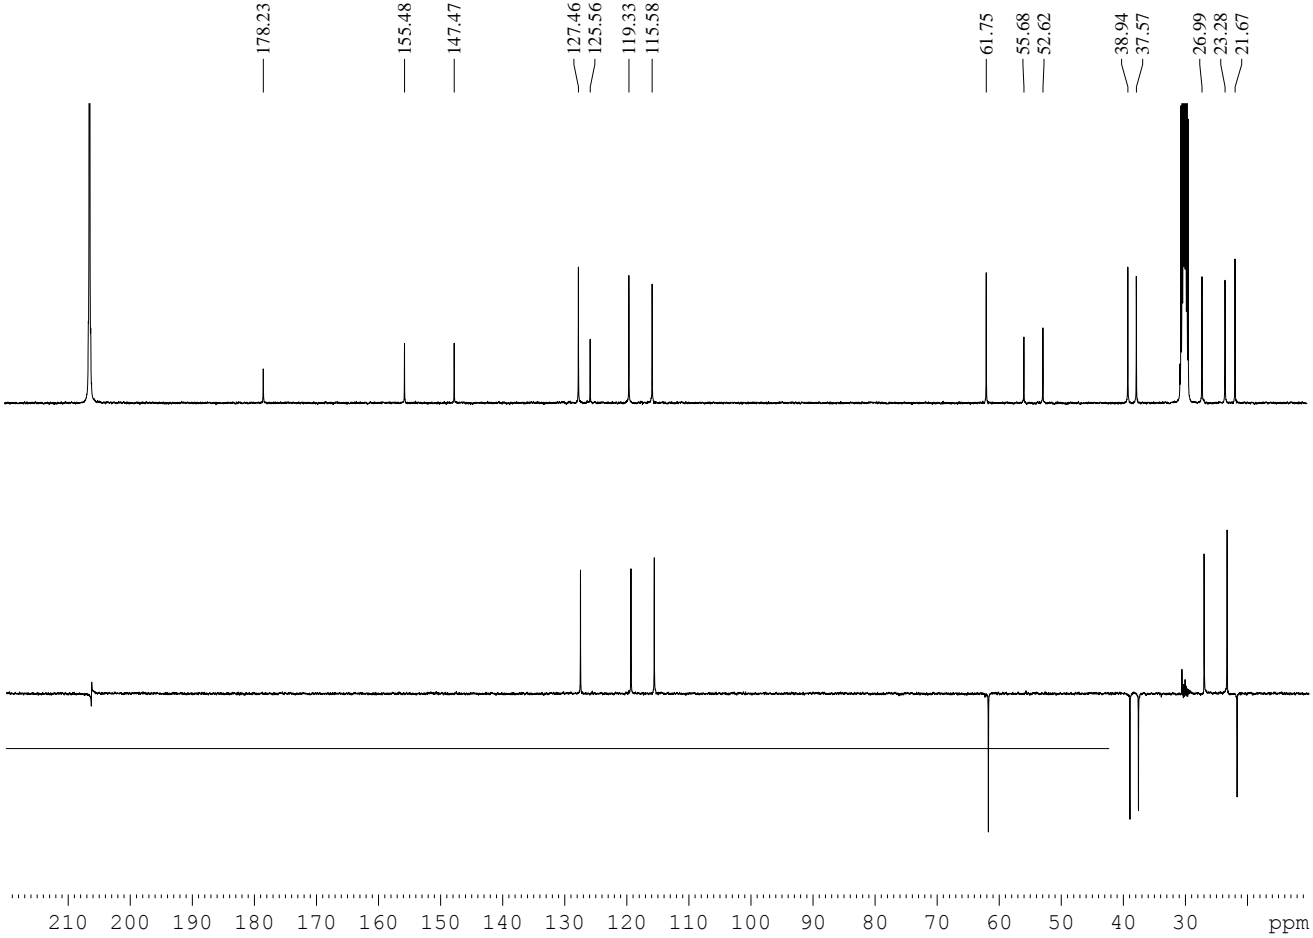

# S 69 COSY spectrum of fomitopin-K (11).

FP-5-13-8-2C Acetone 102/12/15 AVIII400 (COSY90)

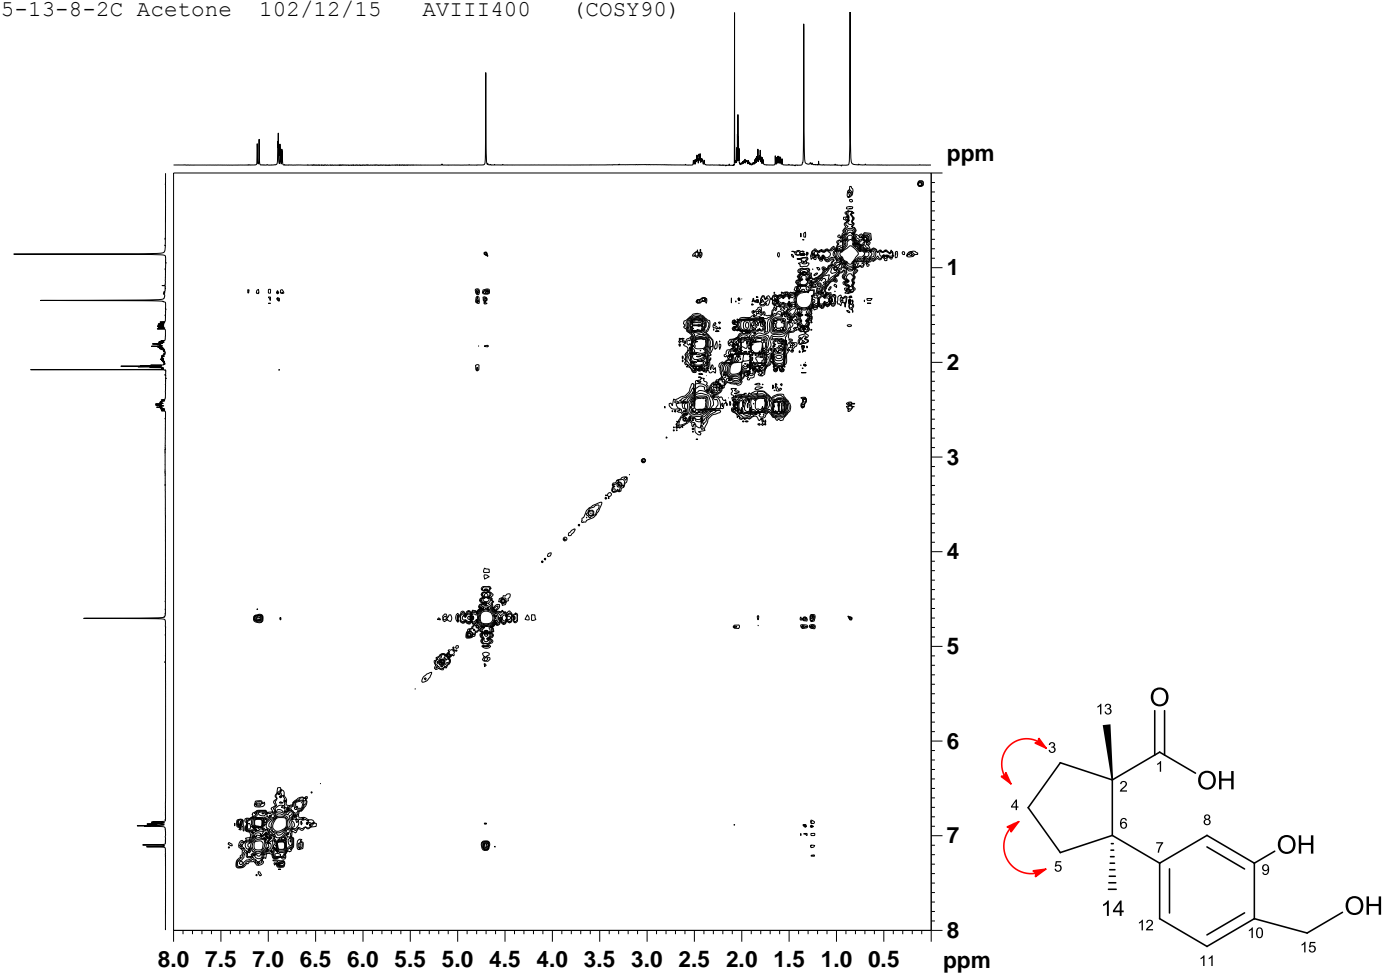

**S 70 HSQC spectrum and key of HSQC spectrum of fomitopin-K (11).**

FP-5-13-8-2C Acetone 102/12/15 AVIII400 (HSQC)

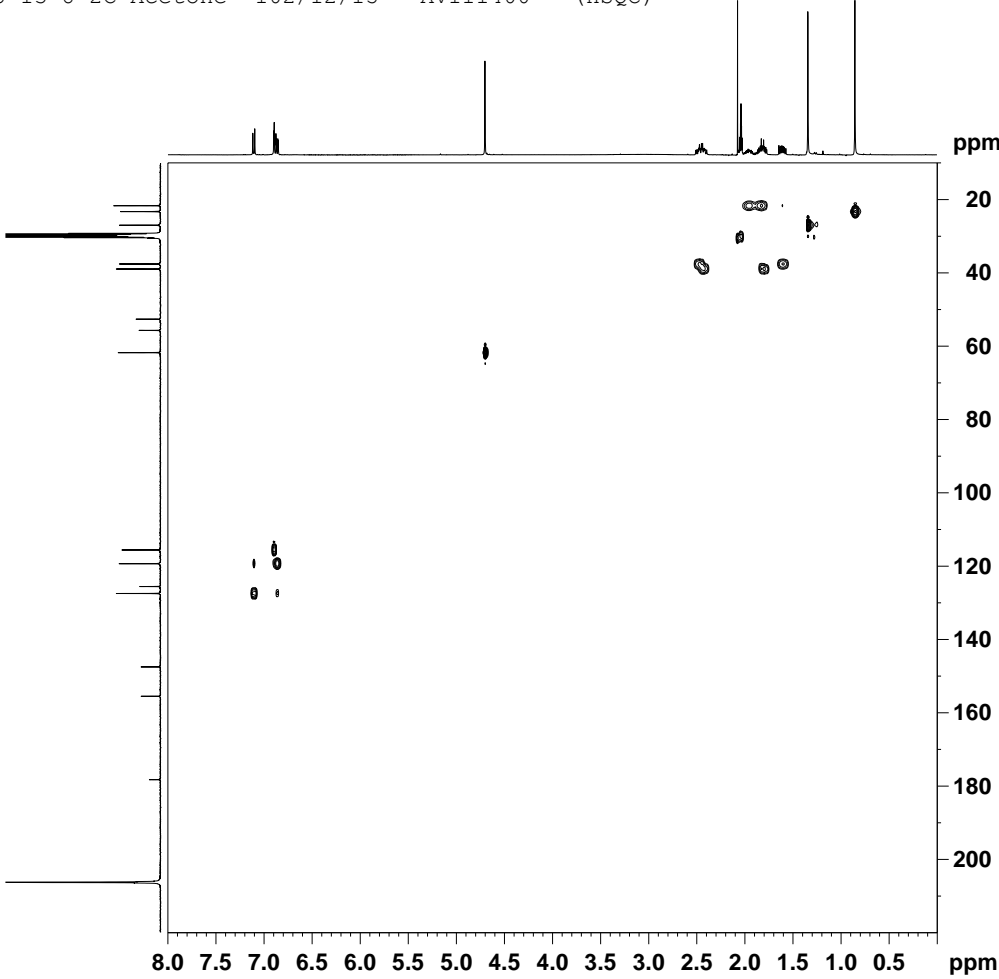

# S 71 HMBC spectrum of fomitopin-K (11).

FP-5-13-8-2C Acetone 102/12/15 AVIII400 (HMBC)

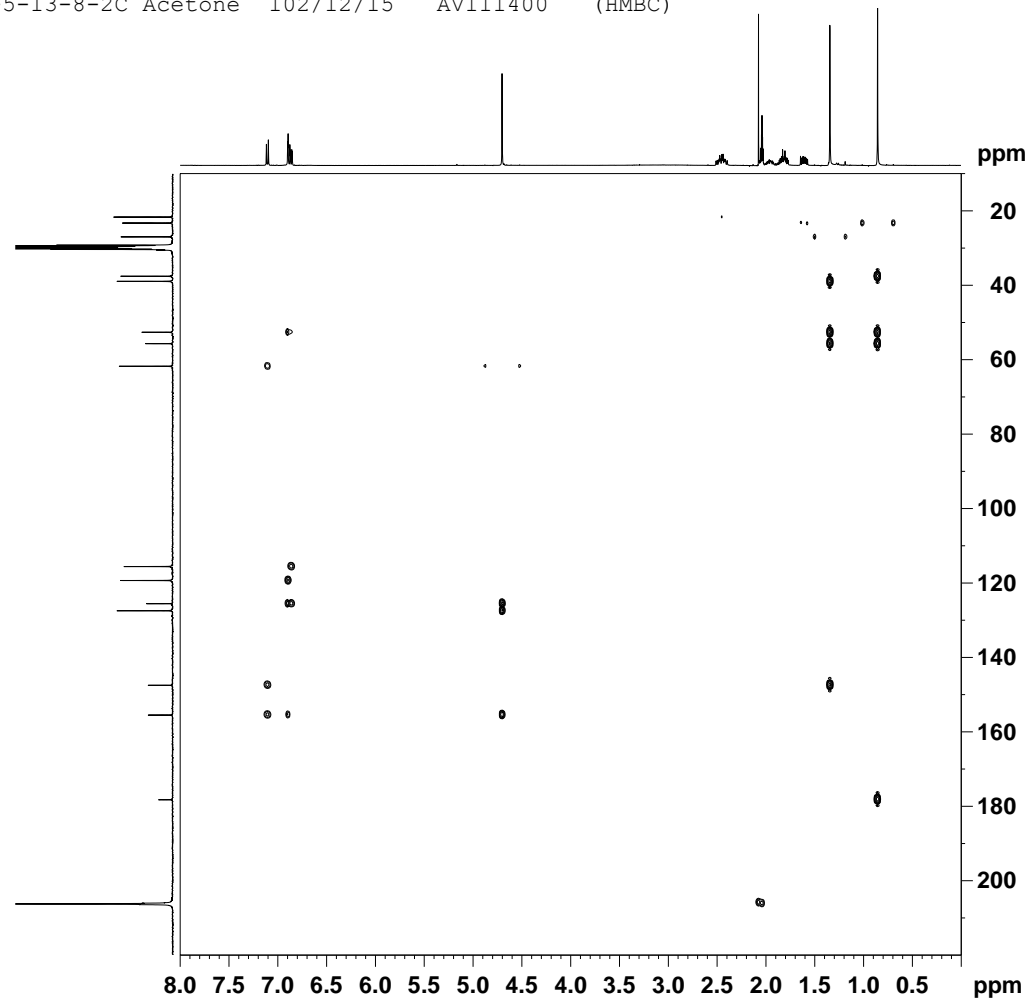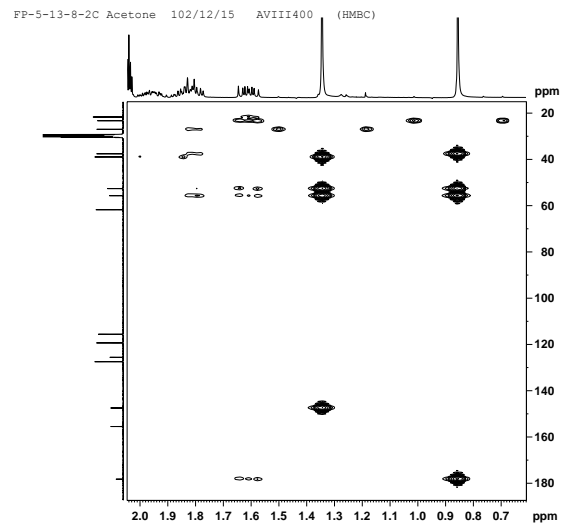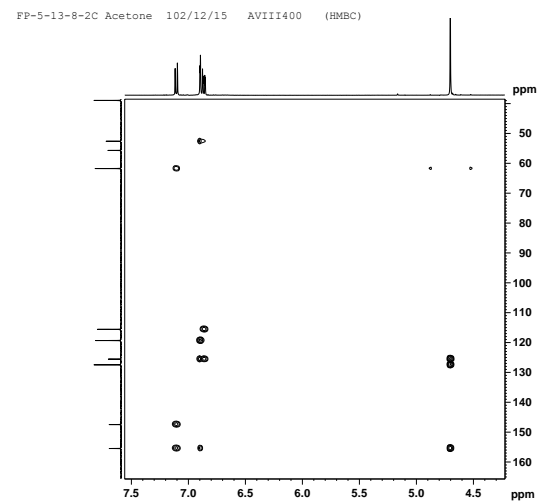

S 72 ECD spectrum of fomitopin-K (11).

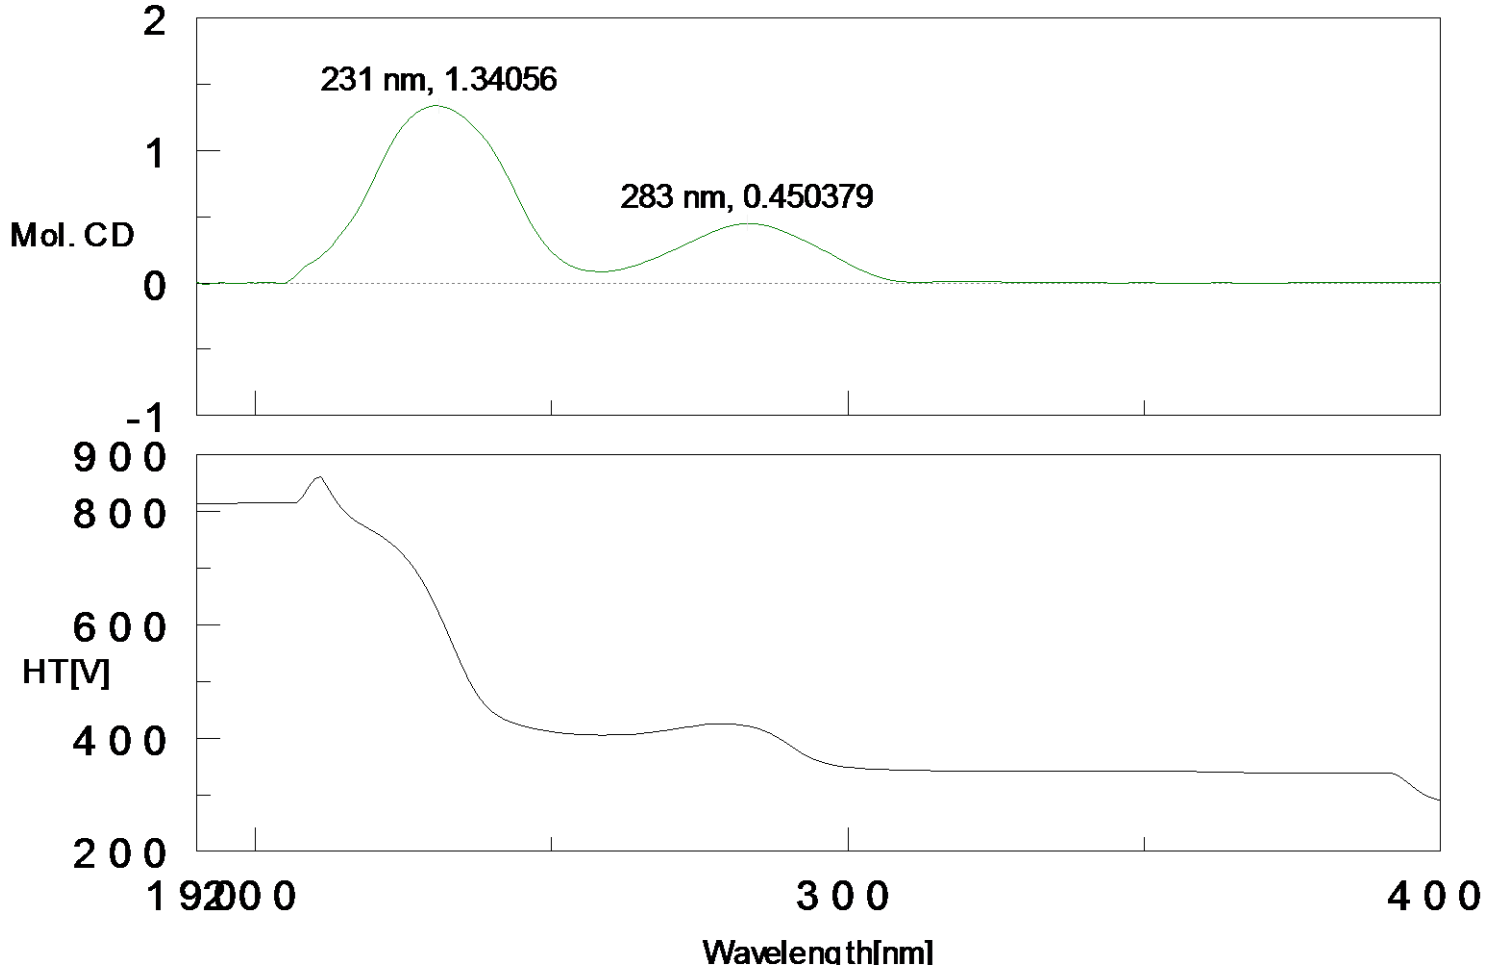

**S 69 <sup>1</sup>H NMR (400 MHz, CDCl<sub>3</sub>) spectrum of fomitopin-L (12).**

FP-6256-t1-t2 CDCl<sub>3</sub> 103/08/18 AVIII400 (H1)

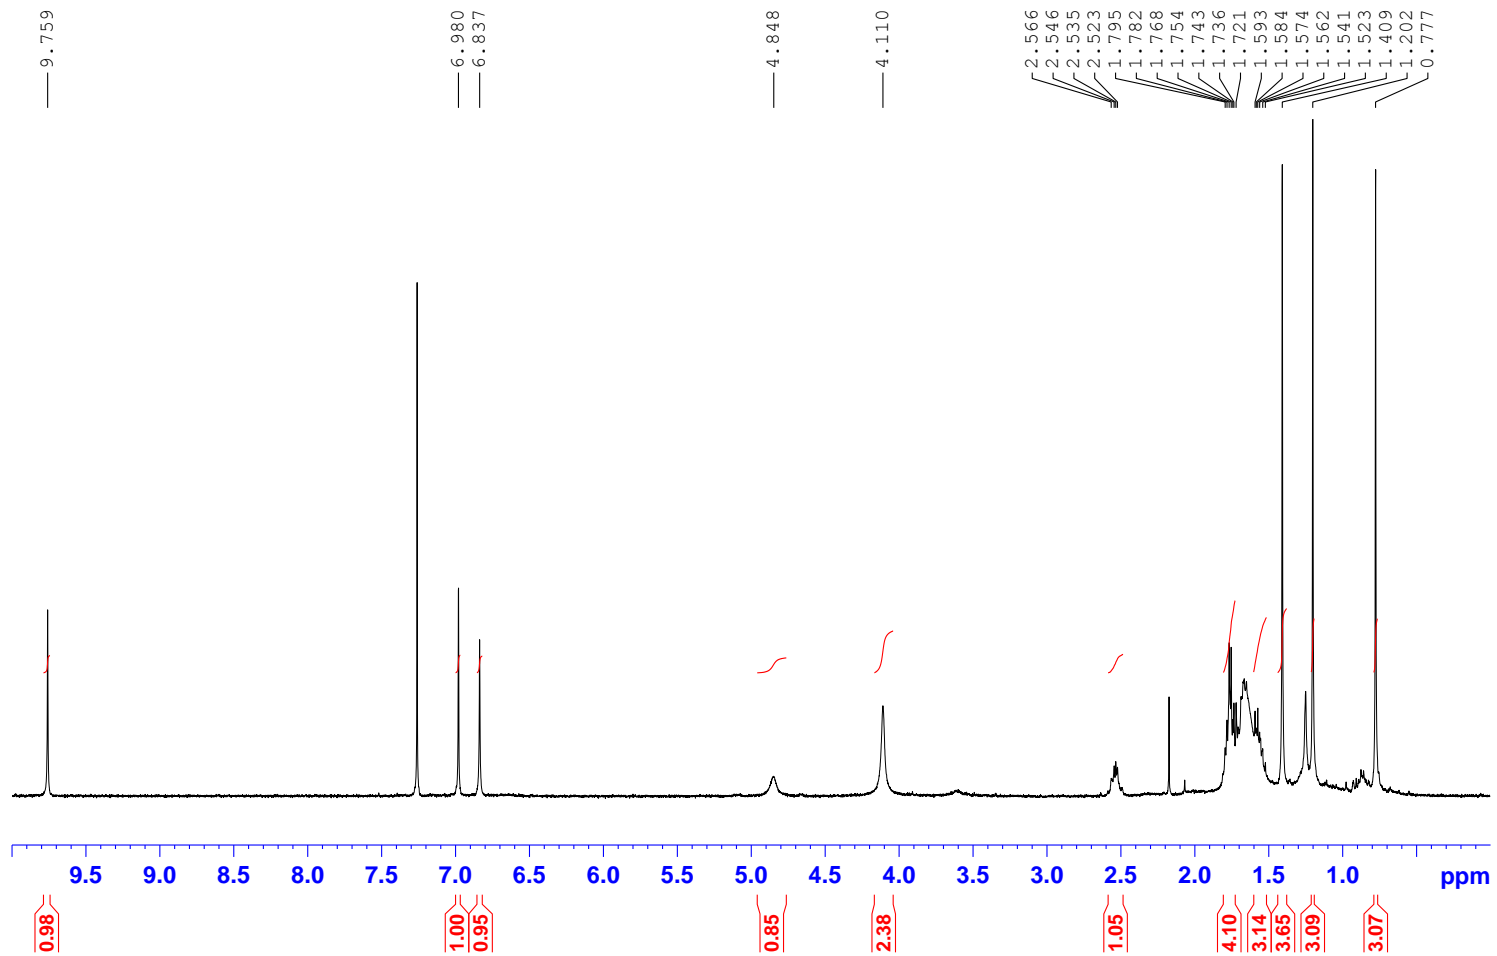

S 70 <sup>13</sup>C NMR (100 MHz, CDCl<sub>3</sub>) spectrum of fomitopin-L (12).

FP-6256-t1-t2 CDC13 103/08/18 AVIII400 (C13)

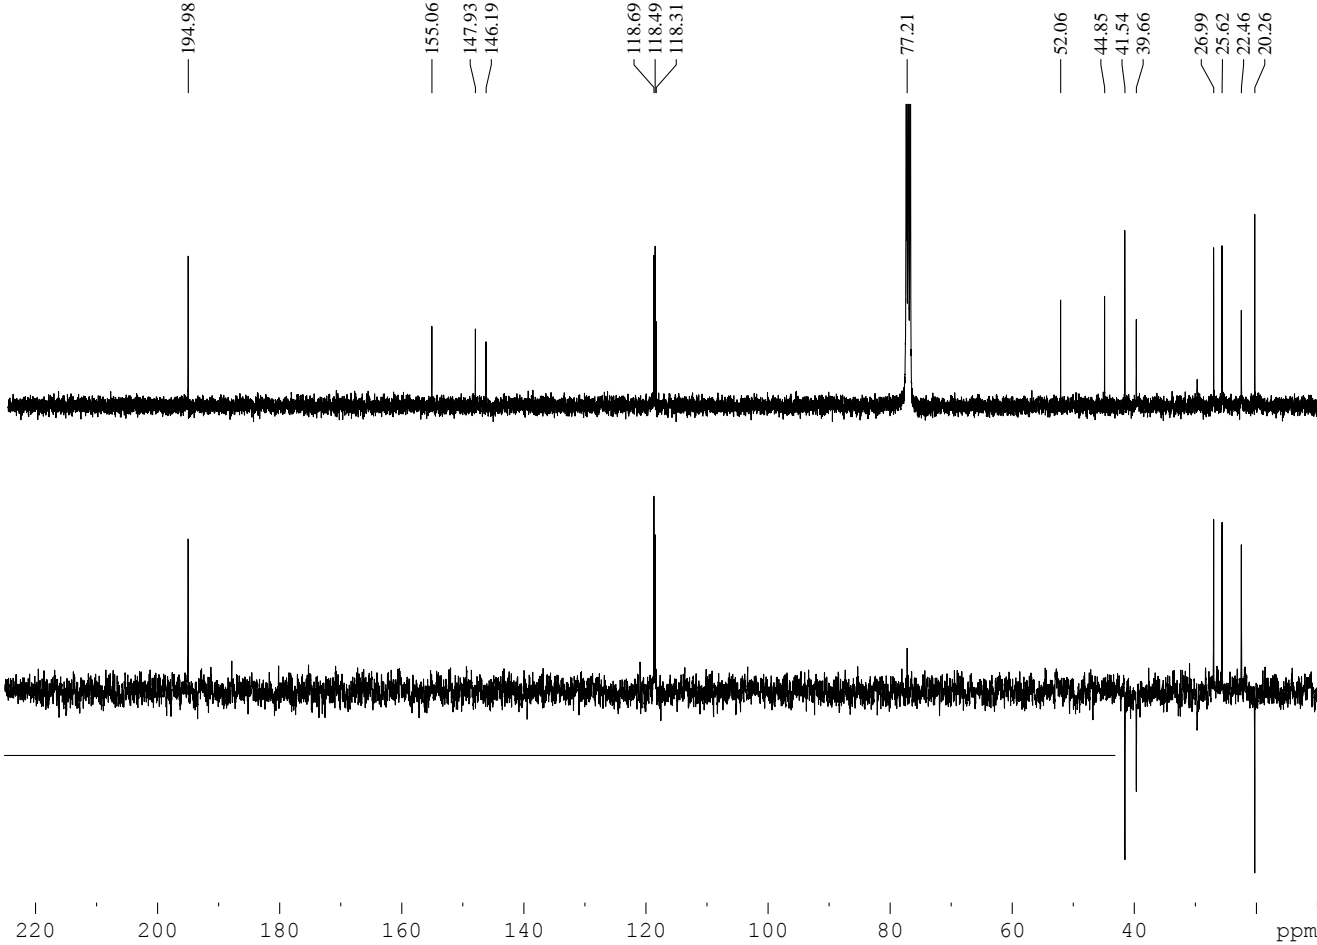



# S 71 COSY spectrum of fomitopin-L (12).

FP-6256-t1-t2 CDC13 103/08/18 AVIII400 (COSY90)

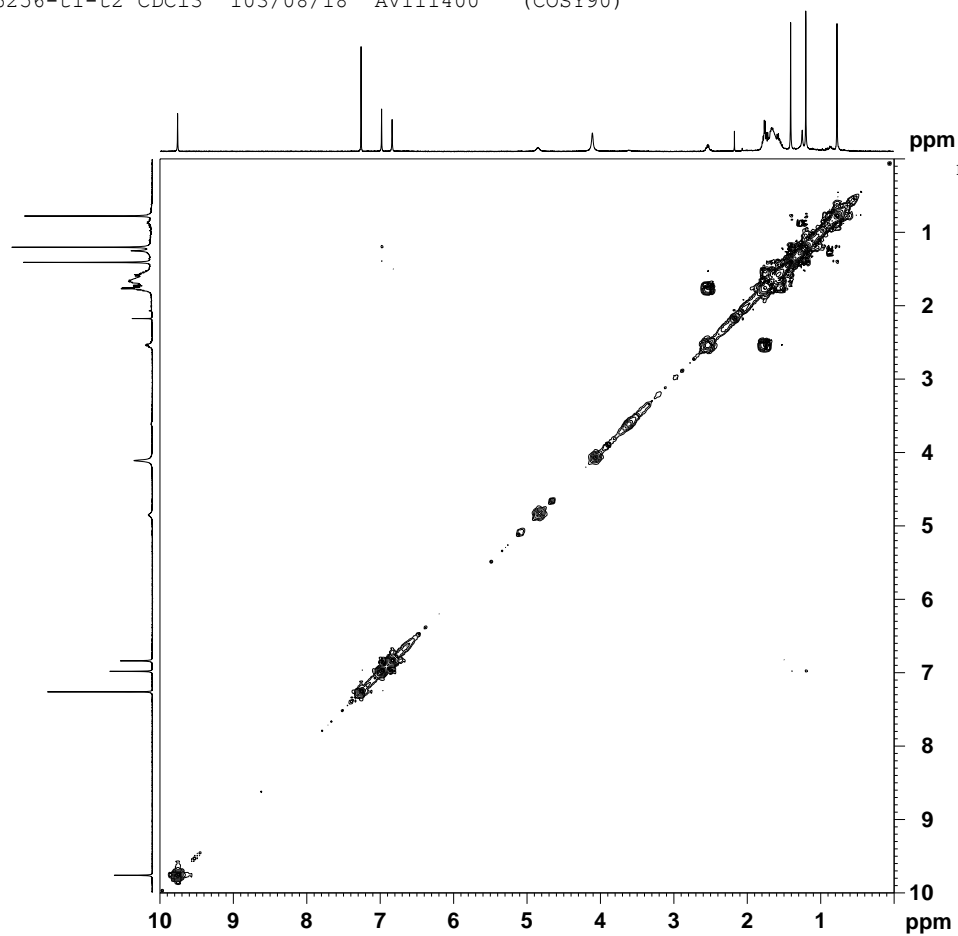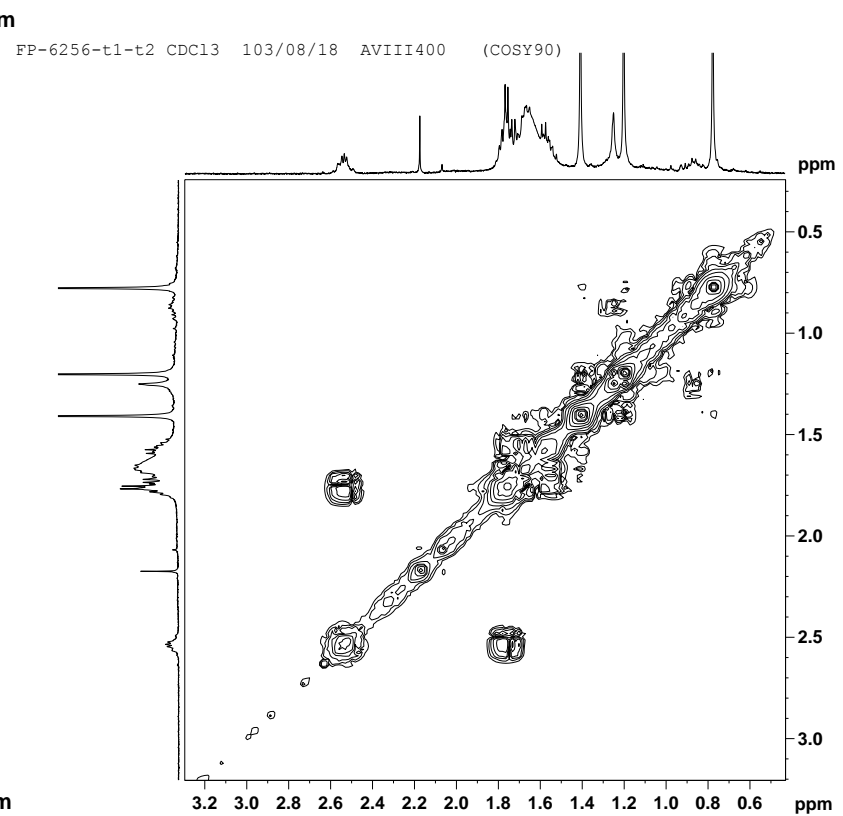

# S 72 HSQC spectrum and key of HSQC spectrum of fomitopin-L (12).

FP-6256-t1-t2 CDC13 103/08/18 AVIII400 (HSQC)

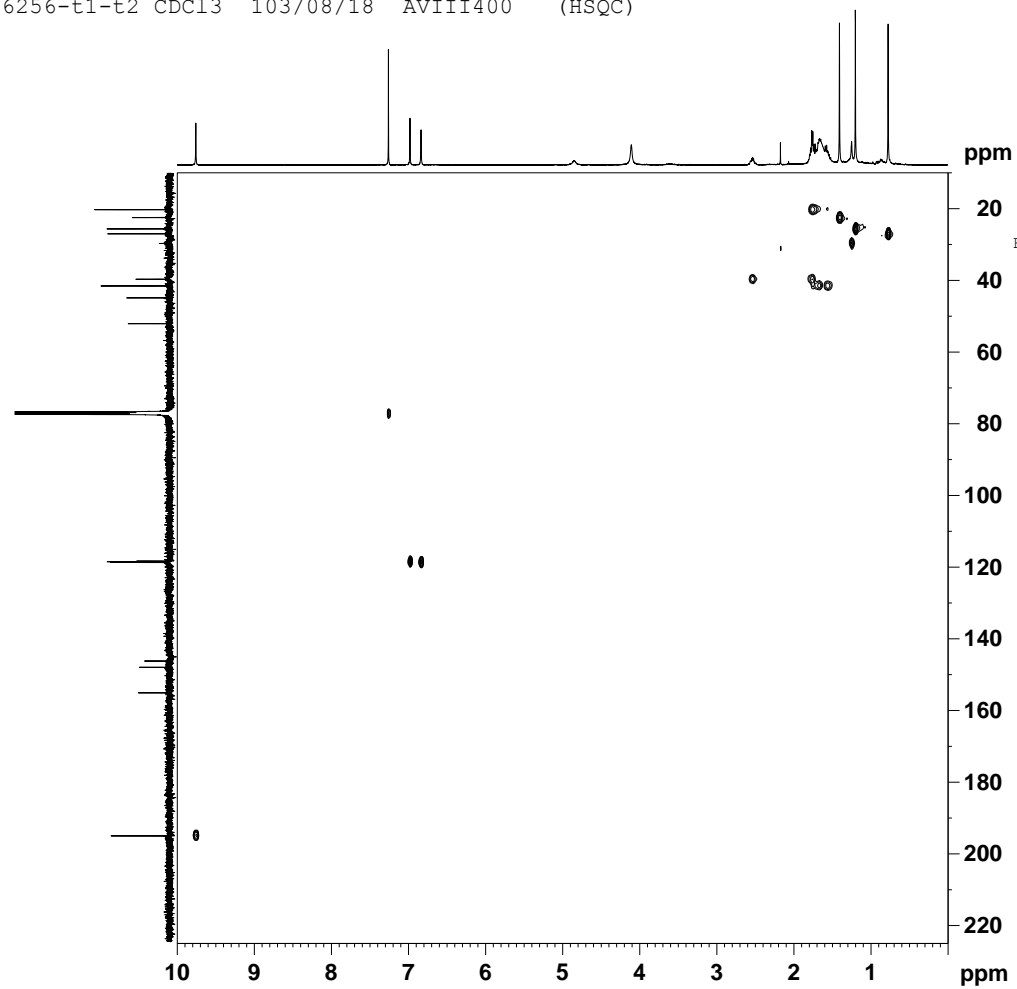

FP-6256-t1-t2 CDC13 103/08/18 AVIII400 (HSQC)

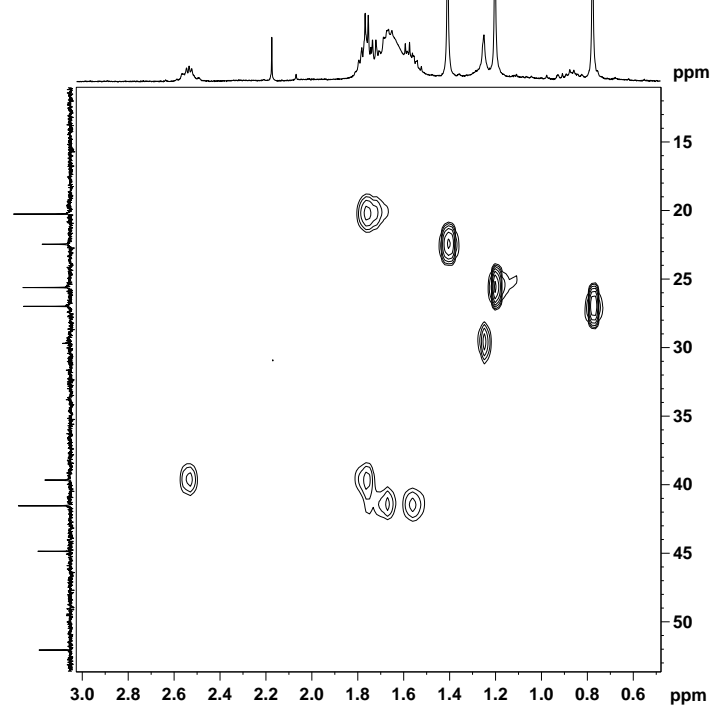

# S 73 HMBC spectrum of fomitopin-L (12).

FP-6256-t1-t2 CDCl3 103/08/18 AVIII400 (HMBC)

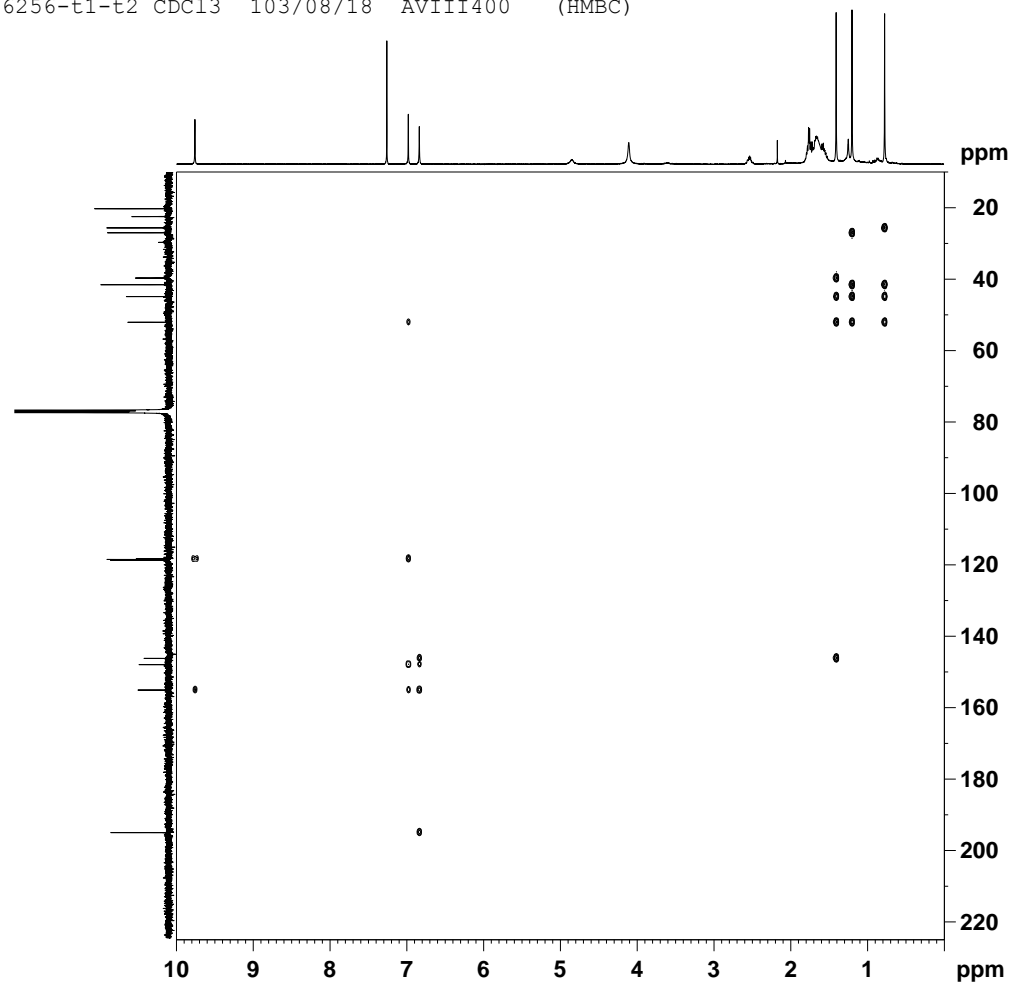

FP-6256-t1-t2 CDCl3 103/08/18 AVIII400 (HMBC)

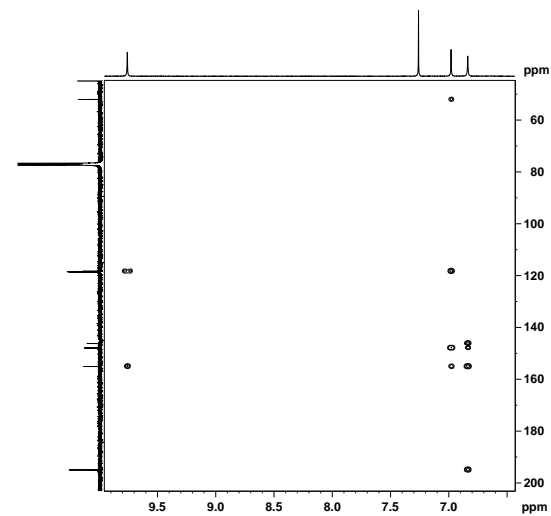

FP-6256-t1-t2 CDCl3 103/08/18 AVIII400 (HMBC)

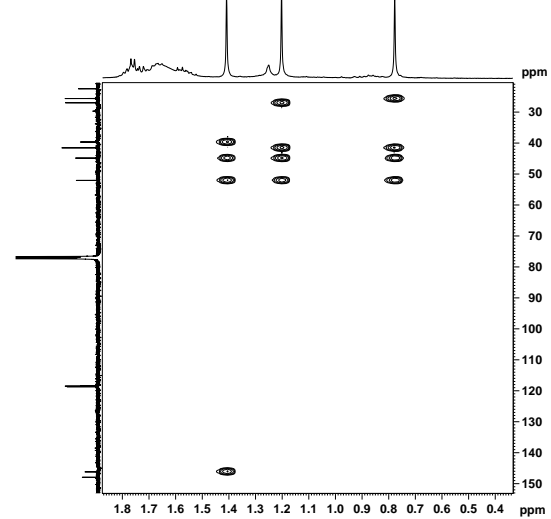

S 74 ECD spectrum of fomitopin-L (12).

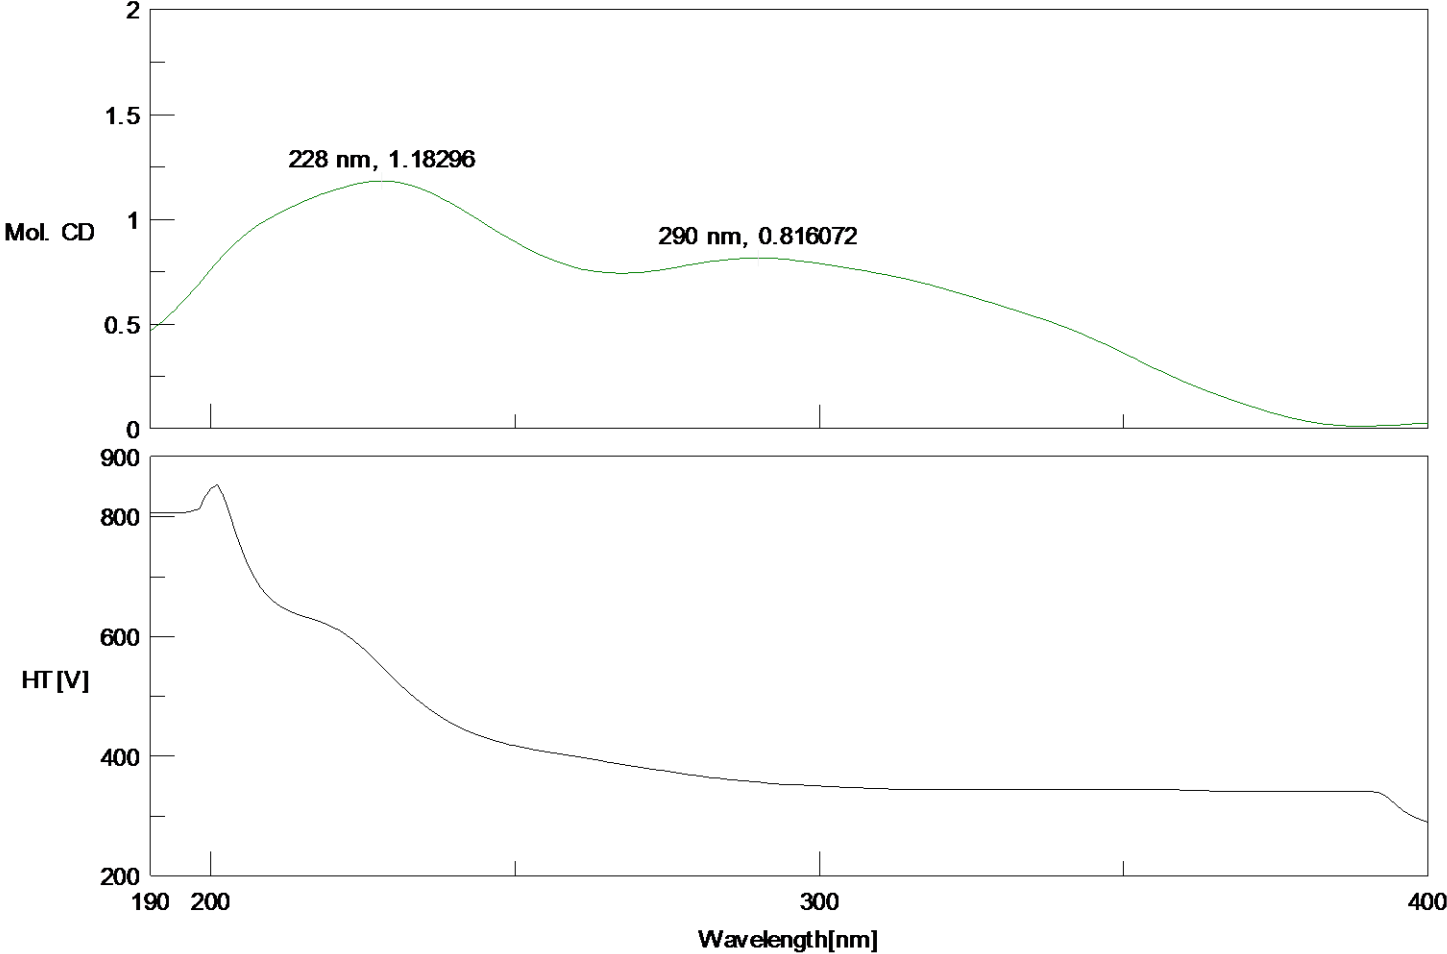

**S 75 Anti-inflammatory activity of *Fomitopsis pinicola* fractions.**

| Fraction | Superoxide anion                   |              |     | Fraction | Elastase release                   |              |     |
|----------|------------------------------------|--------------|-----|----------|------------------------------------|--------------|-----|
|          | IC <sub>50</sub> (μM) <sup>a</sup> | Inh %        |     |          | IC <sub>50</sub> (μM) <sup>a</sup> | Inh %        |     |
| FP 1     | >10                                | 16.45 ± 1.75 | *** | FP 1     | >10                                | 16.10 ± 5.06 | *   |
| FP 2     | >10                                | 19.68 ± 1.91 | *** | FP 2     | >10                                | 17.05 ± 3.73 | *   |
| FP 3     | 2.52 ± 0.24                        | 68.55 ± 1.61 | *** | FP 3     | >10                                | 17.59 ± 3.48 | **  |
| FP 4     | 2.22 ± 0.17                        | 68.73 ± 1.20 | *** | FP 4     | 1.88 ± 0.26                        | 94.52 ± 5.55 | *** |
| FP 5     | 1.64 ± 0.01                        | 90.26 ± 0.68 | *** | FP 5     | 2.85 ± 0.66                        | 95.39 ± 6.53 | *** |
| FP 6     | 4.06 ± 0.24                        | 84.46 ± 2.07 | *** | FP 6     | 3.38 ± 0.89                        | 89.15 ± 8.91 | *** |

Percentage of inhibition (Inh %) at 10 μM concentration.

\* $P < 0.05$ , \*\* $P < 0.01$  compared with the control value.

<sup>a</sup>Concentration necessary for 50 % inhibition(IC<sub>50</sub>)

**Table 1. Crystal data and structure refinement for Fomitopin A.**

|                                 |                                                                                                   |
|---------------------------------|---------------------------------------------------------------------------------------------------|
| Identification code             | Fomitopin A                                                                                       |
| Empirical formula               | C <sub>15</sub> H <sub>18</sub> O <sub>4</sub>                                                    |
| Formula weight                  | 262.29                                                                                            |
| Temperature                     | 150(2) K                                                                                          |
| Wavelength                      | 1.54178 Å                                                                                         |
| Crystal system                  | Orthorhombic                                                                                      |
| Space group                     | P 21 21 21                                                                                        |
| Unit cell dimensions            | a = 6.6564(2) Å      a = 90°.<br>b = 10.3704(3) Å      b = 90°.<br>c = 17.9622(6) Å      g = 90°. |
| Volume                          | 1239.92(7) Å <sup>3</sup>                                                                         |
| Z                               | 4                                                                                                 |
| Density (calculated)            | 1.405 Mg/m <sup>3</sup>                                                                           |
| Absorption coefficient          | 0.831 mm <sup>-1</sup>                                                                            |
| F(000)                          | 560                                                                                               |
| Crystal size                    | 0.45 x 0.36 x 0.32 mm <sup>3</sup>                                                                |
| Theta range for data collection | 4.92 to 72.19°.                                                                                   |
| Index ranges                    | -7<=h<=5, -12<=k<=12, -21<=l<=21                                                                  |
| Reflections collected           | 4664                                                                                              |
| Independent reflections         | 2382 [R(int) = 0.0183]                                                                            |
| Completeness to theta = 72.19°  | 98.3 %                                                                                            |
| Absorption correction           | Semi-empirical from equivalents                                                                   |

|                                   |                                             |
|-----------------------------------|---------------------------------------------|
| Max. and min. transmission        | 1.00000 and 0.96185                         |
| Refinement method                 | Full-matrix least-squares on F <sup>2</sup> |
| Data / restraints / parameters    | 2382 / 0 / 180                              |
| Goodness-of-fit on F <sup>2</sup> | 1.022                                       |
| Final R indices [I>2sigma(I)]     | R1 = 0.0375, wR2 = 0.0975                   |
| R indices (all data)              | R1 = 0.0407, wR2 = 0.1000                   |
| Absolute structure parameter      | 0.0(2)                                      |
| Largest diff. peak and hole       | 0.216 and -0.192 e.Å <sup>-3</sup>          |
